# Supplementary material for: Antibacterial Polyketides from the Deep-Sea Cold-Seep-Derived Fungus Talaromyces sp. CS-258
Source: MDPI journal article supplement (doi:10.3390/md22050204), 2024-04-28
Supplement: s1 [file s1]

# Supplementary Information

## Antibacterial Polyketides from the Deep-Sea Cold-Seep-Derived Fungus *Talaromyces* sp. CS-258

Zhenger Wu <sup>1,2</sup>, Xiao-Ming Li <sup>1,2</sup>, Sui-Qun Yang <sup>1,2</sup>, Bin-Gui Wang <sup>1,2,3,\*</sup> and Xin Li <sup>1,2,3,\*</sup>

<sup>1</sup> CAS and Shandong Province Key Laboratory of Experimental Marine Biology, Institute of Oceanology, Chinese Academy of Sciences, Nanhai Road 7, Qingdao 266071, China

<sup>2</sup> University of Chinese Academy of Sciences, Yuquan Road 19A, Beijing 100049, China

<sup>3</sup> Laboratory for Marine Biology and Biotechnology, Qingdao Marine Science and Technology Center, Wenhai Road 1, Qingdao 266237, China

\* Correspondence: wangbg@ms.qdio.ac.cn (B.-G.W.); lixin@qdio.ac.cn (X.L.)

# Content

|                                                                                                                                                       |    |
|-------------------------------------------------------------------------------------------------------------------------------------------------------|----|
| Figure S1. Chemical structure of compounds <b>1–32</b> .....                                                                                          | 7  |
| Figure S2. The Chiral HPLC separation of compound <b>11</b> with Chiralcel IG column (hexane:<br>isopropanol= 80:20, flow rate of 1 mL/minutes) ..... | 7  |
| Table S1. The antibacterial activity of isolated compounds (MIC, µg/mL).....                                                                          | 8  |
| Table S2. The antifungal activity of isolated compounds .....                                                                                         | 8  |
| Figure S3. HRESIMS spectrum of (3 <i>R</i> ,5' <i>R</i> )-5-hydroxytalaroflavone ( <b>1</b> ) .....                                                   | 9  |
| Figure S4. <sup>1</sup> H NMR spectrum (500 MHz, DMSO) of (3 <i>R</i> ,5' <i>R</i> )-5-hydroxytalaroflavone ( <b>1</b> ).....                         | 9  |
| Figure S5. <sup>13</sup> C NMR spectrum (125 MHz, DMSO) of (3 <i>R</i> ,5' <i>R</i> )-5-hydroxytalaroflavone ( <b>1</b> ).....                        | 10 |
| Figure S6. <sup>1</sup> H- <sup>1</sup> H COSY spectrum of (3 <i>R</i> ,5' <i>R</i> )-5-hydroxytalaroflavone ( <b>1</b> ) .....                       | 10 |
| Figure S7. HSQC spectrum of (3 <i>R</i> ,5' <i>R</i> )-5-hydroxytalaroflavone ( <b>1</b> ).....                                                       | 11 |
| Figure S8. HMBC spectrum of (3 <i>R</i> ,5' <i>R</i> )-5-hydroxytalaroflavone ( <b>1</b> ).....                                                       | 11 |
| Figure S9. NOESY spectrum of (3 <i>R</i> ,5' <i>R</i> )-5-hydroxytalaroflavone ( <b>1</b> ).....                                                      | 12 |
| Figure S10. UV spectrum of (3 <i>R</i> ,5' <i>R</i> )-5-hydroxytalaroflavone ( <b>1</b> ).....                                                        | 12 |
| Figure S11. HRESIMS spectrum of talaroisochromenol A ( <b>3</b> ).....                                                                                | 13 |
| Figure S12. <sup>1</sup> H NMR spectrum (400 MHz, DMSO) of talaroisochromenol A ( <b>3</b> ) .....                                                    | 13 |
| Figure S13. <sup>13</sup> C NMR spectrum (100 MHz, DMSO) of talaroisochromenol A ( <b>3</b> ) .....                                                   | 14 |
| Figure S14. <sup>1</sup> H- <sup>1</sup> H COSY spectrum of talaroisochromenol A ( <b>3</b> ) .....                                                   | 14 |
| Figure S15. HSQC spectrum of talaroisochromenol A ( <b>3</b> ) .....                                                                                  | 15 |
| Figure S16. HMBC spectrum of talaroisochromenol A ( <b>3</b> ) .....                                                                                  | 15 |
| Figure S17. UV spectrum of talaroisochromenol A ( <b>3</b> ).....                                                                                     | 16 |
| Figure S18. HRESIMS spectrum of talaroisochromenol B ( <b>5</b> ).....                                                                                | 16 |
| Figure S19. <sup>1</sup> H NMR spectrum (500 MHz, DMSO) of talaroisochromenol B ( <b>5</b> ) .....                                                    | 17 |
| Figure S20. <sup>13</sup> C NMR spectrum (125 MHz, DMSO) of talaroisochromenol B ( <b>5</b> ) .....                                                   | 17 |
| Figure S21. <sup>1</sup> H- <sup>1</sup> H COSY spectrum of talaroisochromenol B ( <b>5</b> ).....                                                    | 18 |
| Figure S22. HSQC spectrum of talaroisochromenol B ( <b>5</b> ) .....                                                                                  | 18 |
| Figure S23. HMBC spectrum of talaroisochromenol B ( <b>5</b> ) .....                                                                                  | 19 |
| Figure S24. NOESY spectrum of talaroisochromenol B ( <b>5</b> ).....                                                                                  | 19 |
| Figure S25. UV spectrum of talaroisochromenol B ( <b>5</b> ) .....                                                                                    | 20 |
| Figure S26. HRESIMS spectrum of talaroisochromenol C ( <b>11</b> ).....                                                                               | 20 |
| Figure S27. <sup>1</sup> H NMR spectrum (500 MHz, DMSO) of talaroisochromenol C ( <b>11</b> ).....                                                    | 21 |
| Figure S28. <sup>13</sup> C NMR spectrum (125 MHz, DMSO) of talaroisochromenol C ( <b>11</b> ) .....                                                  | 21 |
| Figure S29. <sup>1</sup> H- <sup>1</sup> H COSY spectrum of talaroisochromenol C ( <b>11</b> ).....                                                   | 22 |
| Figure S30. HSQC spectrum of talaroisochromenol C ( <b>11</b> ) .....                                                                                 | 22 |

|                                                                                                                                            |    |
|--------------------------------------------------------------------------------------------------------------------------------------------|----|
| Figure S31. HMBC spectrum of talaroisochromenol C ( <b>11</b> ) .....                                                                      | 23 |
| Figure S32. NOESY spectrum of talaroisochromenol C ( <b>11</b> ).....                                                                      | 23 |
| Figure S33. UV spectrum of talaroisochromenol C ( <b>11</b> ) .....                                                                        | 24 |
| Figure S34. HRESIMS spectrum of (8 <i>R</i> ,9 <i>R</i> ,10 <i>aR</i> )-5-hydroxyaltenuene ( <b>13</b> ) .....                             | 24 |
| Figure S35. <sup>1</sup> H NMR spectrum (500 MHz, DMSO) of (8 <i>R</i> ,9 <i>R</i> ,10 <i>aR</i> )-5-hydroxyaltenuene ( <b>13</b> ) ...    | 25 |
| Figure S36. <sup>13</sup> C NMR spectrum (125 MHz, DMSO) of (8 <i>R</i> ,9 <i>R</i> ,10 <i>aR</i> )-5-hydroxyaltenuene ( <b>13</b> ) ..    | 25 |
| Figure S37. <sup>1</sup> H- <sup>1</sup> H COSY spectrum of (8 <i>R</i> ,9 <i>R</i> ,10 <i>aR</i> )-5-hydroxyaltenuene ( <b>13</b> ) ..... | 26 |
| Figure S38. HSQC spectrum of (8 <i>R</i> ,9 <i>R</i> ,10 <i>aR</i> )-5-hydroxyaltenuene ( <b>13</b> ).....                                 | 26 |
| Figure S39. HMBC spectrum of (8 <i>R</i> ,9 <i>R</i> ,10 <i>aR</i> )-5-hydroxyaltenuene ( <b>13</b> ).....                                 | 27 |
| Figure S40. NOESY spectrum of (8 <i>R</i> ,9 <i>R</i> ,10 <i>aR</i> )-5-hydroxyaltenuene ( <b>13</b> ) .....                               | 27 |
| Figure S41. UV spectrum of (8 <i>R</i> ,9 <i>R</i> ,10 <i>aR</i> )-5-hydroxyaltenuene ( <b>13</b> ).....                                   | 28 |
| Figure S42. HRESIMS spectrum of (8 <i>R</i> ,9 <i>R</i> ,10 <i>aS</i> )-5-hydroxyaltenuene ( <b>14</b> ).....                              | 28 |
| Figure S43. <sup>1</sup> H NMR spectrum (500 MHz, DMSO) of (8 <i>R</i> ,9 <i>R</i> ,10 <i>aS</i> )-5-hydroxyaltenuene ( <b>14</b> )....    | 29 |
| Figure S44. <sup>13</sup> C NMR spectrum (125 MHz, DMSO) of (8 <i>R</i> ,9 <i>R</i> ,10 <i>aS</i> )-5-hydroxyaltenuene ( <b>14</b> ) ..    | 29 |
| Figure S45. <sup>1</sup> H- <sup>1</sup> H COSY spectrum of (8 <i>R</i> ,9 <i>R</i> ,10 <i>aS</i> )-5-hydroxyaltenuene ( <b>14</b> ).....  | 30 |
| Figure S46. HSQC spectrum of (8 <i>R</i> ,9 <i>R</i> ,10 <i>aS</i> )-5-hydroxyaltenuene ( <b>14</b> ) .....                                | 30 |
| Figure S47. HMBC spectrum of (8 <i>R</i> ,9 <i>R</i> ,10 <i>aS</i> )-5-hydroxyaltenuene ( <b>14</b> ) .....                                | 31 |
| Figure S48. NOESY spectrum of (8 <i>R</i> ,9 <i>R</i> ,10 <i>aS</i> )-5-hydroxyaltenuene ( <b>14</b> ).....                                | 31 |
| Figure S49. UV spectrum of (8 <i>R</i> ,9 <i>R</i> ,10 <i>aS</i> )-5-hydroxyaltenuene ( <b>14</b> ) .....                                  | 32 |
| Figure S50. HRESIMS spectrum of (8 <i>R</i> ,9 <i>S</i> ,10 <i>aR</i> )-5-hydroxyaltenuene ( <b>15</b> ).....                              | 32 |
| Figure S51. <sup>1</sup> H NMR spectrum (500 MHz, DMSO) of (8 <i>R</i> ,9 <i>S</i> ,10 <i>aR</i> )-5-hydroxyaltenuene ( <b>15</b> )....    | 33 |
| Figure S52. <sup>13</sup> C NMR spectrum (125 MHz, DMSO) of (8 <i>R</i> ,9 <i>S</i> ,10 <i>aR</i> )-5-hydroxyaltenuene ( <b>15</b> ) ..    | 33 |
| Figure S53. <sup>1</sup> H- <sup>1</sup> H COSY spectrum of (8 <i>R</i> ,9 <i>S</i> ,10 <i>aR</i> )-5-hydroxyaltenuene ( <b>15</b> ).....  | 34 |
| Figure S54. HSQC spectrum of (8 <i>R</i> ,9 <i>S</i> ,10 <i>aR</i> )-5-hydroxyaltenuene ( <b>15</b> ) .....                                | 34 |
| Figure S55. HMBC spectrum of (8 <i>R</i> ,9 <i>S</i> ,10 <i>aR</i> )-5-hydroxyaltenuene ( <b>15</b> ) .....                                | 35 |
| Figure S56. NOESY spectrum of (8 <i>R</i> ,9 <i>S</i> ,10 <i>aR</i> )-5-hydroxyaltenuene ( <b>15</b> ).....                                | 35 |
| Figure S57. UV spectrum of (8 <i>R</i> ,9 <i>S</i> ,10 <i>aR</i> )-5-hydroxyaltenuene ( <b>15</b> ) .....                                  | 36 |
| Figure S58. HRESIMS spectrum of nemanecin D ( <b>25</b> ).....                                                                             | 36 |
| Figure S59. <sup>1</sup> H NMR spectrum (500 MHz, DMSO) of nemanecin D ( <b>25</b> ).....                                                  | 37 |
| Figure S60. <sup>13</sup> C NMR spectrum (125 MHz, DMSO) of nemanecin D ( <b>25</b> ).....                                                 | 37 |
| Figure S61. <sup>1</sup> H- <sup>1</sup> H COSY spectrum of nemanecin D ( <b>25</b> ) .....                                                | 38 |
| Figure S62. HSQC spectrum of nemanecin D ( <b>25</b> ).....                                                                                | 38 |
| Figure S63. HMBC spectrum of nemanecin D ( <b>25</b> ).....                                                                                | 39 |
| Figure S64. NOESY spectrum of nemanecin D ( <b>25</b> ).....                                                                               | 39 |
| Figure S65. <sup>1</sup> H NMR spectrum of ( <i>S</i> )-MTPA ester ( <b>25a</b> ).....                                                     | 40 |

|                                                                                                            |    |
|------------------------------------------------------------------------------------------------------------|----|
| Figure S66. $^1\text{H}$ - $^1\text{H}$ COSY spectrum of ( <i>S</i> )-MTPA ester ( <b>25a</b> ).....       | 40 |
| Figure S67. HRMS spectrum of ( <i>S</i> )-MTPA ester ( <b>25a</b> ).....                                   | 41 |
| Figure S68. $^1\text{H}$ NMR spectrum of ( <i>R</i> )-MTPA ester ( <b>25b</b> ).....                       | 41 |
| Figure S69. $^1\text{H}$ - $^1\text{H}$ COSY spectrum of ( <i>R</i> )-MTPA ester ( <b>25b</b> ).....       | 42 |
| Figure S70. HRMS spectrum of ( <i>R</i> )-MTPA ester ( <b>25b</b> ).....                                   | 42 |
| Figure S71. UV spectrum of nemanecin D ( <b>25</b> ).....                                                  | 43 |
| Figure S72. HRESIMS spectrum of nemanecin E ( <b>26</b> ) .....                                            | 43 |
| Figure S73. $^1\text{H}$ NMR spectrum (500 MHz, DMSO) of nemanecin E ( <b>26</b> ) .....                   | 44 |
| Figure S74. $^{13}\text{C}$ NMR spectrum (125 MHz, DMSO) of nemanecin E ( <b>26</b> ) .....                | 44 |
| Figure S75. $^1\text{H}$ - $^1\text{H}$ COSY spectrum of nemanecin E ( <b>26</b> ) .....                   | 45 |
| Figure S76. HSQC spectrum of nemanecin E ( <b>26</b> ) .....                                               | 45 |
| Figure S77. HMBC spectrum of nemanecin E ( <b>26</b> ) .....                                               | 46 |
| Figure S78. NOESY spectrum of nemanecin E ( <b>26</b> ) .....                                              | 46 |
| Figure S79. $^1\text{H}$ NMR spectrum of ( <i>S</i> )-MTPA Ester ( <b>26a</b> ) .....                      | 47 |
| Figure S80. $^1\text{H}$ - $^1\text{H}$ COSY spectrum of ( <i>S</i> )-MTPA Ester ( <b>26a</b> ).....       | 47 |
| Figure S81. HRMS spectrum of ( <i>S</i> )-MTPA Ester ( <b>26a</b> ).....                                   | 48 |
| Figure S82. $^1\text{H}$ NMR spectrum of ( <i>R</i> )-MTPA Ester ( <b>26b</b> ) .....                      | 48 |
| Figure S83. $^1\text{H}$ - $^1\text{H}$ COSY spectrum of ( <i>R</i> )-MTPA Ester ( <b>26b</b> ) .....      | 49 |
| Figure S84. HRMS spectrum of ( <i>R</i> )-MTPA Ester ( <b>26b</b> ) .....                                  | 49 |
| Figure S85. UV spectrum of nemanecin E ( <b>26</b> ) .....                                                 | 50 |
| Figure S86. HRESIMS spectrum of 2,5-dimethy-8-iodochromone ( <b>27</b> ) .....                             | 50 |
| Figure S87. $^1\text{H}$ NMR spectrum (500 MHz, DMSO) of 2,5-dimethy-8-iodochromone ( <b>27</b> ).....     | 51 |
| Figure S88. $^{13}\text{C}$ NMR spectrum (125 MHz, DMSO) of 2,5-dimethy-8-iodochromone ( <b>27</b> ).....  | 51 |
| Figure S89. $^1\text{H}$ - $^1\text{H}$ COSY spectrum of 2,5-dimethy-8-iodochromone ( <b>27</b> ) .....    | 52 |
| Figure S90. HSQC spectrum of 2,5-dimethy-8-iodochromone ( <b>27</b> ).....                                 | 52 |
| Figure S91. HMBC spectrum of 2,5-dimethy-8-iodochromone ( <b>27</b> ).....                                 | 53 |
| Figure S92. UV spectrum of 2,5-dimethy-8-iodochromone ( <b>27</b> ).....                                   | 53 |
| Figure S93. HRESIMS spectrum of 6-hydroxy-4-methoxycoumarin ( <b>28</b> ).....                             | 54 |
| Figure S94. $^1\text{H}$ NMR spectrum (400 MHz, DMSO) of 6-hydroxy-4-methoxycoumarin ( <b>28</b> ).....    | 54 |
| Figure S95. $^{13}\text{C}$ NMR spectrum (100 MHz, DMSO) of 6-hydroxy-4-methoxycoumarin ( <b>28</b> )..... | 55 |
| Figure S96. $^1\text{H}$ - $^1\text{H}$ COSY spectrum of 6-hydroxy-4-methoxycoumarin ( <b>28</b> ).....    | 55 |
| Figure S97. HSQC spectrum of 6-hydroxy-4-methoxycoumarin ( <b>28</b> ).....                                | 56 |
| Figure S98. HMBC spectrum of 6-hydroxy-4-methoxycoumarin ( <b>28</b> ).....                                | 56 |
| Figure S100. HRESIMS spectrum of talarofurolactone A ( <b>29</b> ) .....                                   | 57 |
| Figure S101. $^1\text{H}$ NMR spectrum (500 MHz, DMSO) of talarofurolactone A ( <b>29</b> ).....           | 58 |



|                                                                                                                                                            |    |
|------------------------------------------------------------------------------------------------------------------------------------------------------------|----|
| Figure S102. <sup>13</sup> C NMR spectrum (125 MHz, DMSO) of talarofurolactone A ( <b>29</b> ).....                                                        | 58 |
| Figure S103. <sup>1</sup> H- <sup>1</sup> H COSY spectrum of talarofurolactone A ( <b>29</b> ).....                                                        | 59 |
| Figure S104. HSQC spectrum of talarofurolactone A ( <b>29</b> ).....                                                                                       | 59 |
| Figure S105. HMBC spectrum of talarofurolactone A ( <b>20</b> ).....                                                                                       | 60 |
| Figure S106. NOESY spectrum of talarofurolactone A ( <b>29</b> ) .....                                                                                     | 60 |
| Figure S107. UV spectrum of talarofurolactone A ( <b>29</b> ).....                                                                                         | 61 |
| Table S3. Energy analysis for the conformers of (3 <i>R</i> ,5' <i>R</i> )-5-hydroxytalaroflavone ( <b>1</b> ) .....                                       | 61 |
| Figure S108. B3LYP/6-31G(d) optimized low-energy conformers of (3 <i>R</i> ,5' <i>R</i> )-5-hydroxytalaroflavone ( <b>1</b> ).....                         | 61 |
| Table S4. Energy analysis for the conformers of (9 <i>aS</i> )-talaroisochromenol A ( <b>3</b> ) .....                                                     | 61 |
| Figure S109. B3LYP/6-31G(d) optimized low-energy conformers of (9 <i>aS</i> )-talaroisochromenol A ( <b>3</b> ).....                                       | 62 |
| Table S5. Energy analysis for the conformers of (7 <i>R</i> ,8 <i>S</i> ,9 <i>R</i> )-talaroisochromenol B ( <b>5</b> ) .....                              | 62 |
| Figure S110. B3LYP/6-31G(d) optimized low-energy conformers of (7 <i>R</i> ,8 <i>S</i> ,9 <i>R</i> )-talaroisochromenol B ( <b>5</b> ) .....               | 63 |
| Table S6. Energy analysis for the conformers of (3 <i>aS</i> , 9 <i>bS</i> )-talaroisochromenol C ( <b>11</b> ) .....                                      | 63 |
| Figure S111. B3LYP/6-31G(d) optimized low-energy conformers of (3 <i>aS</i> , 9 <i>bS</i> )-talaroisochromenol C ( <b>11</b> ) .....                       | 63 |
| Table S7. Energy analysis for the conformers of (8 <i>R</i> ,9 <i>R</i> ,10 <i>aR</i> )-5-hydroxyaltenuene ( <b>13</b> ).....                              | 63 |
| Figure S112. B3LYP/6-31G(d) optimized low-energy conformers of (8 <i>R</i> ,9 <i>R</i> ,10 <i>aR</i> )-5-hydroxyaltenuene ( <b>13</b> ) .....              | 64 |
| Table S8. Energy analysis for the conformers of (8 <i>S</i> ,9 <i>S</i> ,10 <i>aR</i> )-5-hydroxyaltenuene ( <i>ent</i> - <b>14</b> ) .....                | 64 |
| Figure S113. B3LYP/6-31G(d) optimized low-energy conformers of (8 <i>S</i> ,9 <i>S</i> ,10 <i>aR</i> )-5-hydroxyaltenuene ( <i>ent</i> - <b>14</b> ) ..... | 64 |
| Table S9. Energy analysis for the conformers of (8 <i>R</i> ,9 <i>S</i> ,10 <i>aR</i> )-5-hydroxyaltenuene ( <b>15</b> ).....                              | 65 |
| Figure S114. B3LYP/6-31G(d) optimized low-energy conformers of (8 <i>R</i> ,9 <i>S</i> ,10 <i>aR</i> )-5-hydroxyaltenuene ( <b>15</b> ) .....              | 65 |
| Table S10. Energy analysis for the conformers of (7 <i>S</i> ,8 <i>R</i> ,8 <i>aR</i> ,10 <i>S</i> )-nemanecin D ( <b>25a</b> ).....                       | 65 |
| Figure S115. B3LYP/6-31G(d) optimized low-energy conformers of (7 <i>S</i> ,8 <i>R</i> ,8 <i>aR</i> ,10 <i>S</i> )-nemanecin D ( <b>25a</b> ).....         | 66 |
| Table S11. Energy analysis for the conformers of (7 <i>R</i> ,8 <i>S</i> ,8 <i>aS</i> ,10 <i>S</i> )-nemanecin D ( <b>25b</b> ) .....                      | 66 |
| Figure S116. B3LYP/6-31G(d) optimized low-energy conformers of (7 <i>R</i> ,8 <i>S</i> ,8 <i>aS</i> ,10 <i>S</i> )-nemanecin D ( <b>25b</b> ).....         | 67 |
| Table S12. Energy analysis for the conformers of (7 <i>R</i> ,8 <i>S</i> ,8 <i>aS</i> ,10 <i>R</i> )-nemanecin E ( <b>26a</b> ) .....                      | 67 |

|                                                                                                                                                                             |    |
|-----------------------------------------------------------------------------------------------------------------------------------------------------------------------------|----|
| Figure S117. B3LYP/6-31G(d) optimized low-energy conformers of (7 <i>R</i> ,8 <i>S</i> ,8 <i>aS</i> ,10 <i>R</i> )-nemanecin E ( <b>26a</b> ) .....                         | 68 |
| Table S13. Energy analysis for conformers of (7 <i>S</i> ,8 <i>R</i> ,8 <i>aR</i> ,10 <i>R</i> )-nemanecin E ( <b>26b</b> ) .....                                           | 68 |
| Figure S118. B3LYP/6-31G(d) optimized low-energy conformers of (7 <i>S</i> ,8 <i>R</i> ,8 <i>aR</i> ,10 <i>R</i> )-nemanecin E ( <b>26b</b> ) .....                         | 69 |
| Table S14. Energy analysis for the conformers of (5 <i>R</i> ,3' <i>S</i> )-talarofurolactone A ( <b>29a</b> ) .....                                                        | 69 |
| Figure S119. B3LYP/6-31G(d) optimized low-energy conformers of (5 <i>R</i> ,3' <i>S</i> )-talarofurolactone A ( <b>29a</b> ).....                                           | 70 |
| Table S15. Energy analysis for the conformers of (5 <i>S</i> ,3' <i>R</i> )-talarofurolactone A ( <b>29b</b> ) .....                                                        | 70 |
| Figure S120. B3LYP/6-31G(d) optimized low-energy conformers of (5 <i>S</i> ,3' <i>R</i> )-talarofurolactone A ( <b>29b</b> ).....                                           | 71 |
| Table S16. DP4 <sup>+</sup> probability analysis of <b>15</b> (mPW1PW91/6-31+G (d, p) level).....                                                                           | 71 |
| Table S17. The experimental and calculated chemical shifts (DP4 <sup>+</sup> ) of <b>15</b> .....                                                                           | 72 |
| Table S18. The calculated shielding tensors of each conformer for isomer 1 (8 <i>R</i> <sup>*</sup> ,9 <i>S</i> <sup>*</sup> ,10 <i>aR</i> <sup>*</sup> - <b>15</b> ) ..... | 73 |
| Table S19. The calculated shielding tensors of each conformer for isomer 2 (8 <i>S</i> <sup>*</sup> ,9 <i>S</i> <sup>*</sup> ,10 <i>aR</i> <sup>*</sup> - <b>15</b> ).....  | 73 |
| Table S20. DP4 <sup>+</sup> probability analysis of <b>29</b> (mPW1PW91/6-31+G(d, p) level).....                                                                            | 74 |
| Table S21. The experimental and calculated chemical shifts (DP4 <sup>+</sup> ) of <b>29</b> .....                                                                           | 75 |
| Table S22. The calculated shielding tensors of each conformer for isomer 1 (5 <i>R</i> <sup>*</sup> ,3' <i>R</i> <sup>*</sup> - <b>29</b> ) .....                           | 76 |
| Table S23. The calculated shielding tensors of each conformer for isomer 2 (5 <i>R</i> <sup>*</sup> ,3' <i>S</i> <sup>*</sup> - <b>29</b> ). .....                          | 76 |

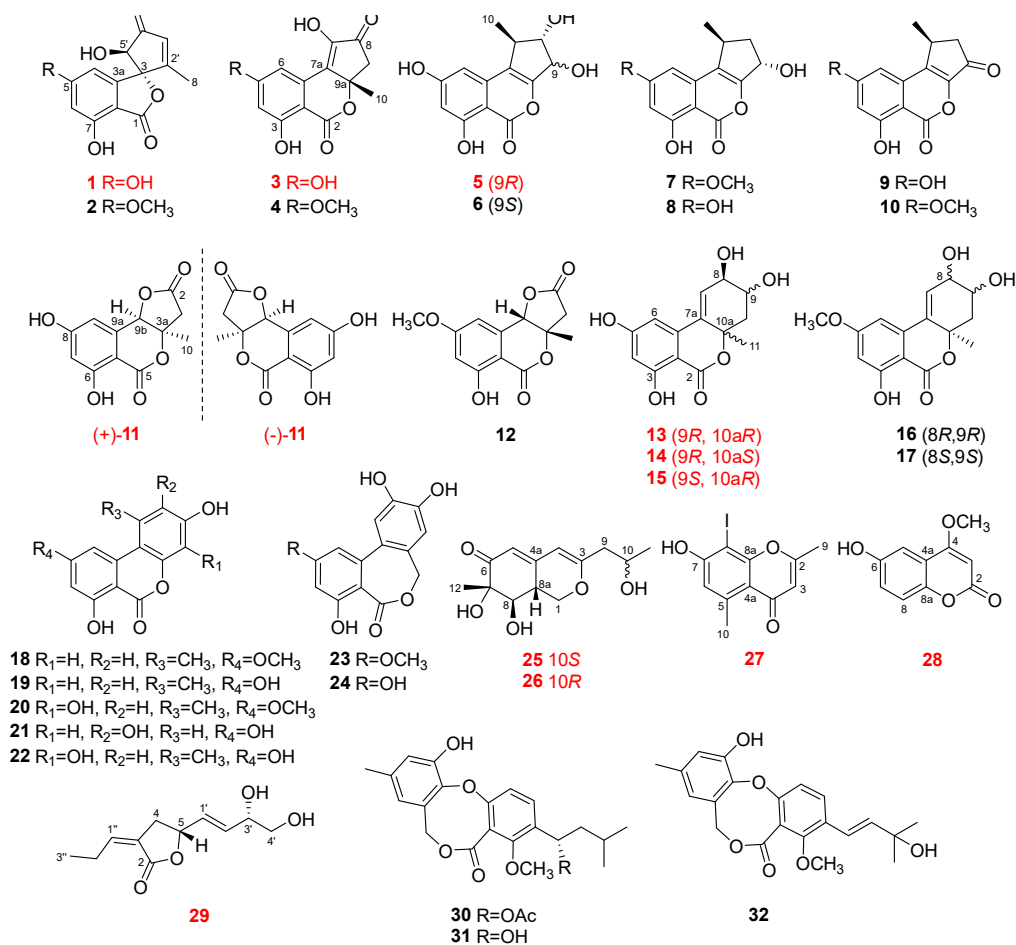

Figure S1. Chemical structure of compounds 1–32

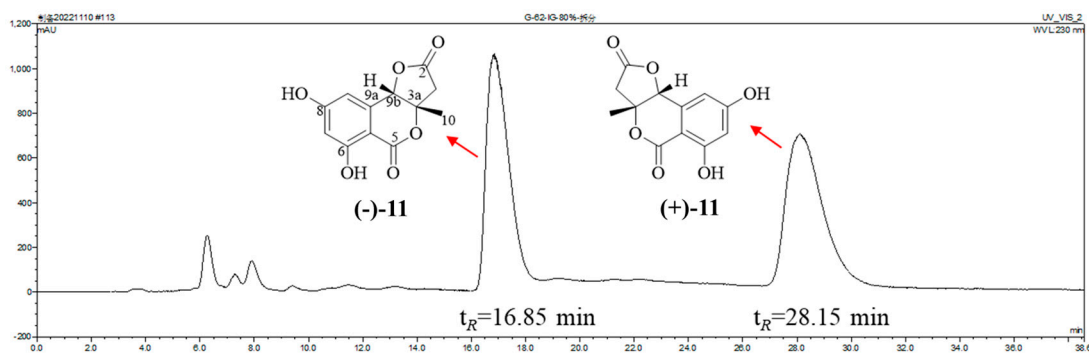

Figure S2. The Chiral HPLC separation of compound **11** with Chiralcel IG column  
(hexane: isopropanol= 80:20, flow rate of 1 mL/minutes)

Table S1. The antibacterial activity of isolated compounds (MIC, µg/mL)

| Bacteria | Compounds       |   |   |   |   |    |   |    |     |    |    |    |
|----------|-----------------|---|---|---|---|----|---|----|-----|----|----|----|
|          | chloramphenicol | 1 | 2 | 4 | 5 | 7  | 8 | 9  | 10  | 11 | 12 | 13 |
| MRSA     | 8               | - | - | - | - | 64 | - | -  | -   | -  | -  | -  |
| PA       | 4               | - | - | - | - | 16 | - | -  | 32  | -  | -  | -  |
| EC       | 0.25            | - | - | - | - | 32 | - | 32 | 0.5 | -  | -  | -  |
| KP       | 8               | - | - | - | - | 64 | - | 64 | 64  | -  | -  | -  |
| VAl      | 1               | - | - | - | - | -  | - | 64 | -   | -  | -  | -  |
| AH       | 0.5             | - | - | - | - | 32 | - | 32 | 0.5 | -  | -  | -  |
| ML       | 1               | - | - | - | - | 32 | - | 32 | -   | -  | -  | -  |
| VAn      | 1               | - | - | - | - | 64 | - | -  | -   | -  | -  | -  |
| VP       | 1               | - | - | - | - | 32 | - | 32 | 1   | -  | -  | -  |
| VV       | 4               | - | - | - | - | -  | - | 32 | 16  | -  | -  | -  |
| VH       | 2               | - | - | - | - | 32 | - | 16 | 0.5 | -  | -  | -  |

| Bacteria | Compounds       |    |    |    |    |     |    |    |    |     |    |     |    |    |
|----------|-----------------|----|----|----|----|-----|----|----|----|-----|----|-----|----|----|
|          | chloramphenicol | 14 | 15 | 16 | 17 | 18  | 19 | 20 | 21 | 22  | 23 | 24  | 30 | 31 |
| MRSA     | 8               | -  | -  | -  | -  | -   | 64 | 64 | -  | -   | -  | -   | 64 | -  |
| PA       | 4               | -  | -  | -  | -  | -   | 16 | 4  | -  | -   | -  | -   | 32 | 32 |
| EC       | 0.25            | -  | -  | -  | -  | 0.5 | 8  | 4  | 32 | 32  | -  | 8   | 4  | 64 |
| KP       | 8               | -  | -  | -  | -  | -   | 64 | 64 | -  | 64  | -  | 64  | 64 | 64 |
| VAl      | 1               | -  | -  | -  | -  | -   | 32 | 64 | 64 | 32  | -  | -   | -  | 64 |
| AH       | 0.5             | -  | -  | -  | -  | 4   | 8  | 4  | -  | 0.5 | -  | 0.5 | 8  | -  |
| ML       | 1               | -  | -  | -  | -  | -   | 8  | 4  | -  | -   | -  | -   | 8  | -  |
| VAn      | 1               | -  | -  | -  | -  | -   | 8  | 64 | -  | -   | -  | -   | 16 | -  |
| VP       | 1               | -  | -  | -  | -  | 2   | 8  | 4  | 64 | 0.5 | -  | 64  | 32 | 32 |
| VV       | 4               | -  | -  | -  | -  | -   | 8  | 4  | -  | -   | -  | -   | -  | -  |
| VH       | 2               | -  | -  | -  | -  | 32  | 16 | 8  | -  | 32  | -  | 64  | 8  | -  |

Table S2. The antifungal activity of isolated compounds

| Fungi                     | Compounds      |   |   |   |   |   |   |   |    |    |    |    |    |
|---------------------------|----------------|---|---|---|---|---|---|---|----|----|----|----|----|
|                           | amphotericin B | 1 | 2 | 4 | 5 | 7 | 8 | 9 | 10 | 11 | 12 | 13 | 14 |
| <i>C. cornigerum</i>      | < 64           | - | - | - | - | - | - | - | -  | -  | -  | -  | -  |
| <i>P. digitatum</i>       | < 64           | - | - | - | - | - | - | - | -  | -  | -  | -  | -  |
| <i>P. piricola</i>        | < 64           | - | - | - | - | - | - | - | -  | -  | -  | -  | -  |
| <i>V. mali</i>            | < 64           | - | - | - | - | - | - | - | -  | -  | -  | -  | -  |
| <i>C. gloeosporioides</i> | < 64           | - | - | - | - | - | - | - | -  | -  | -  | -  | -  |
| <i>F. oxysporum</i>       | < 64           | - | - | - | - | - | - | - | -  | -  | -  | -  | -  |

| Fungi                     | Compounds      |    |    |    |    |    |    |    |    |    |    |    |    |
|---------------------------|----------------|----|----|----|----|----|----|----|----|----|----|----|----|
|                           | amphotericin B | 15 | 16 | 17 | 18 | 19 | 20 | 21 | 22 | 23 | 24 | 30 | 31 |
| <i>C. cornigerum</i>      | < 64           | -  | -  | -  | -  | -  | -  | -  | -  | -  | -  | -  | -  |
| <i>P. digitatum</i>       | < 64           | -  | -  | -  | -  | -  | -  | -  | -  | -  | -  | -  | -  |
| <i>P. piricola</i>        | < 64           | -  | -  | -  | -  | -  | -  | -  | -  | -  | -  | -  | -  |
| <i>V. mali</i>            | < 64           | -  | -  | -  | -  | -  | -  | -  | -  | -  | -  | -  | -  |
| <i>C. gloeosporioides</i> | < 64           | -  | -  | -  | -  | -  | -  | -  | -  | -  | -  | -  | -  |
| <i>F. oxysporum</i>       | < 64           | -  | -  | -  | -  | -  | -  | -  | -  | -  | -  | -  | -  |

:- no activity.

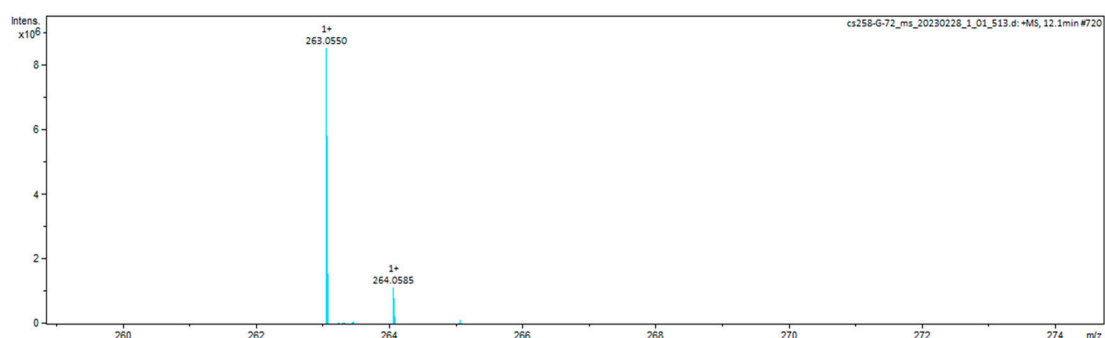

| Meas. m/z  | z | Ion Formula                                    | Score  | m/z        | err [mDa] | err [ppm] | mSigma | rdB | eConf | N-Rule | Adduct | Sum Formula                                    |
|------------|---|------------------------------------------------|--------|------------|-----------|-----------|--------|-----|-------|--------|--------|------------------------------------------------|
| 263.055012 | 1 | C <sub>13</sub> H <sub>11</sub> O <sub>6</sub> | 100.00 | 263.055014 | 0.0       | 0.0       | 8.9    | 8.5 | even  | ok     | M+H    | C <sub>13</sub> H <sub>10</sub> O <sub>6</sub> |

Figure S3. HRESIMS spectrum of (3*R*,5'*R*)-5-hydroxytalaroflavone (**1**)

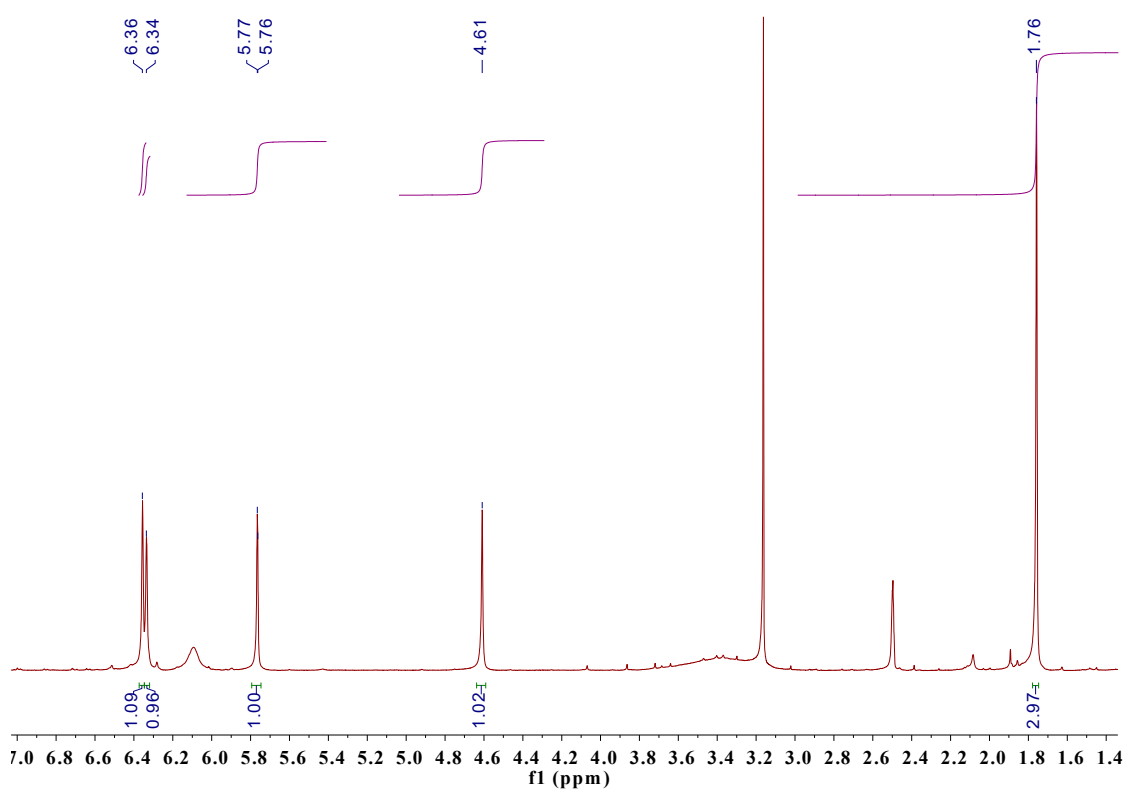

Figure S4. <sup>1</sup>H NMR spectrum (500 MHz, DMSO) of (3*R*,5'*R*)-5-hydroxytalaroflavone (**1**)

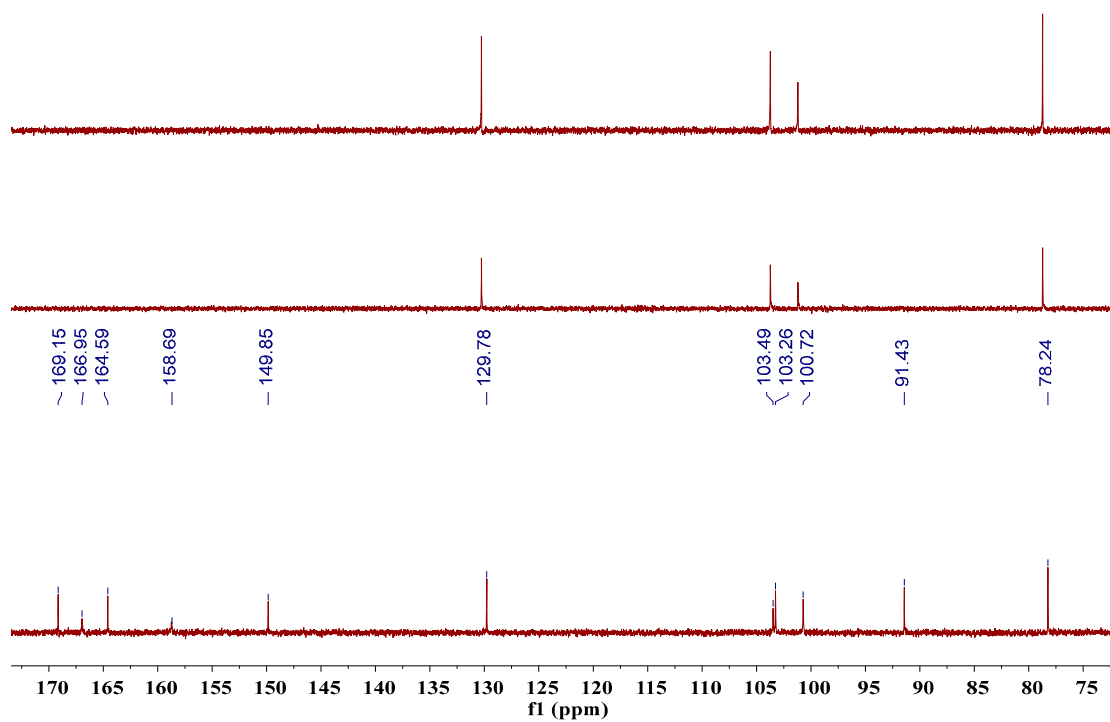

Figure S5.  $^{13}\text{C}$  NMR spectrum (125 MHz, DMSO) of (3*R*,5'*R*)-5-hydroxytalaroflavone (**1**)

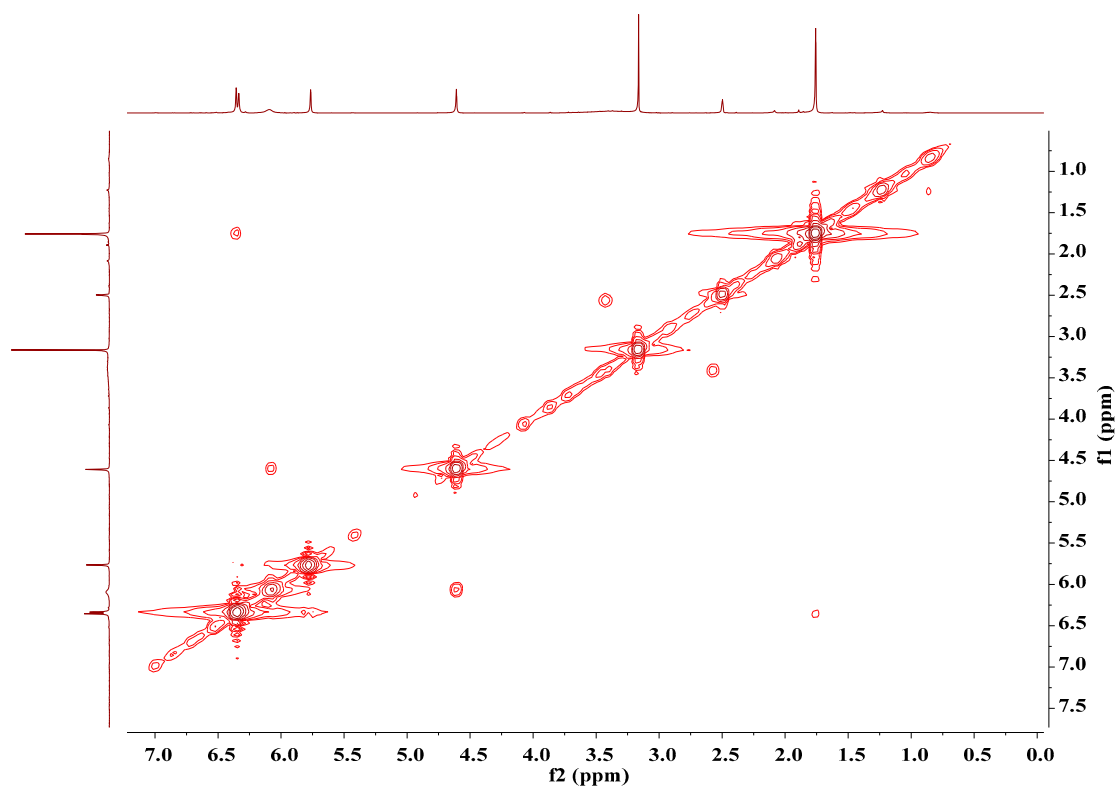

Figure S6.  $^1\text{H}$ - $^1\text{H}$  COSY spectrum of (3*R*,5'*R*)-5-hydroxytalaroflavone (**1**)

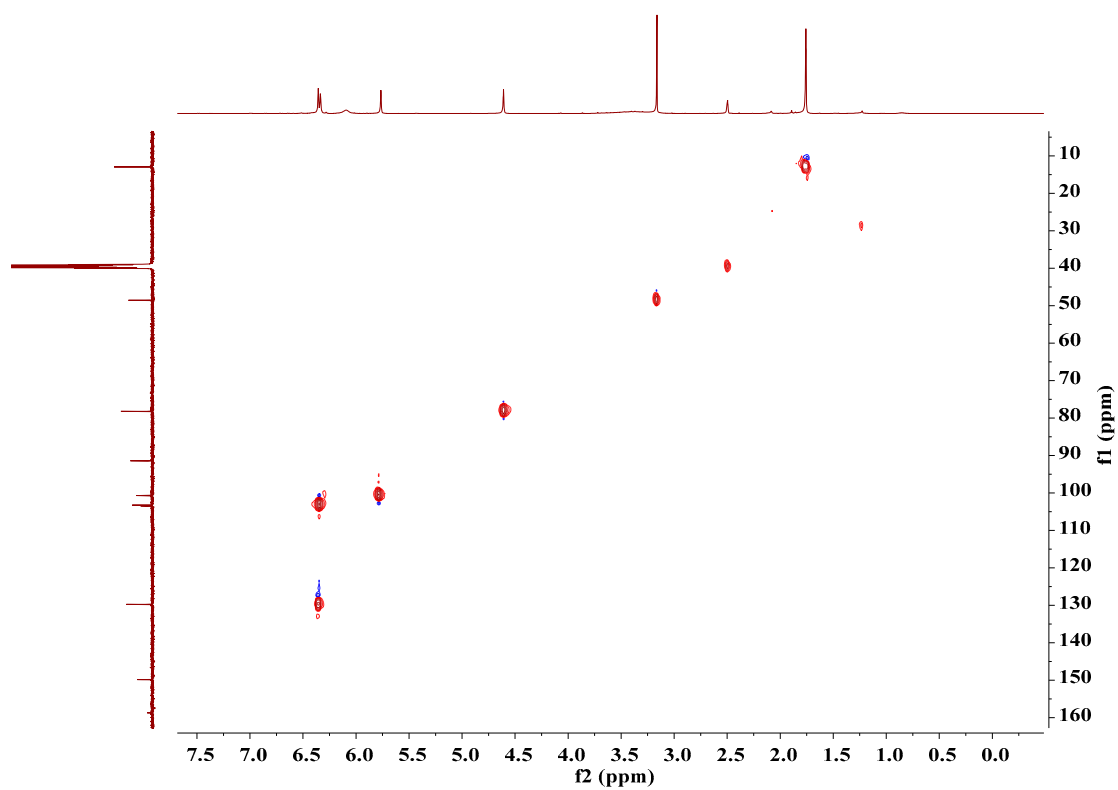

Figure S7. HSQC spectrum of (3*R*,5'*R*)-5-hydroxytalaroflavone (**1**)

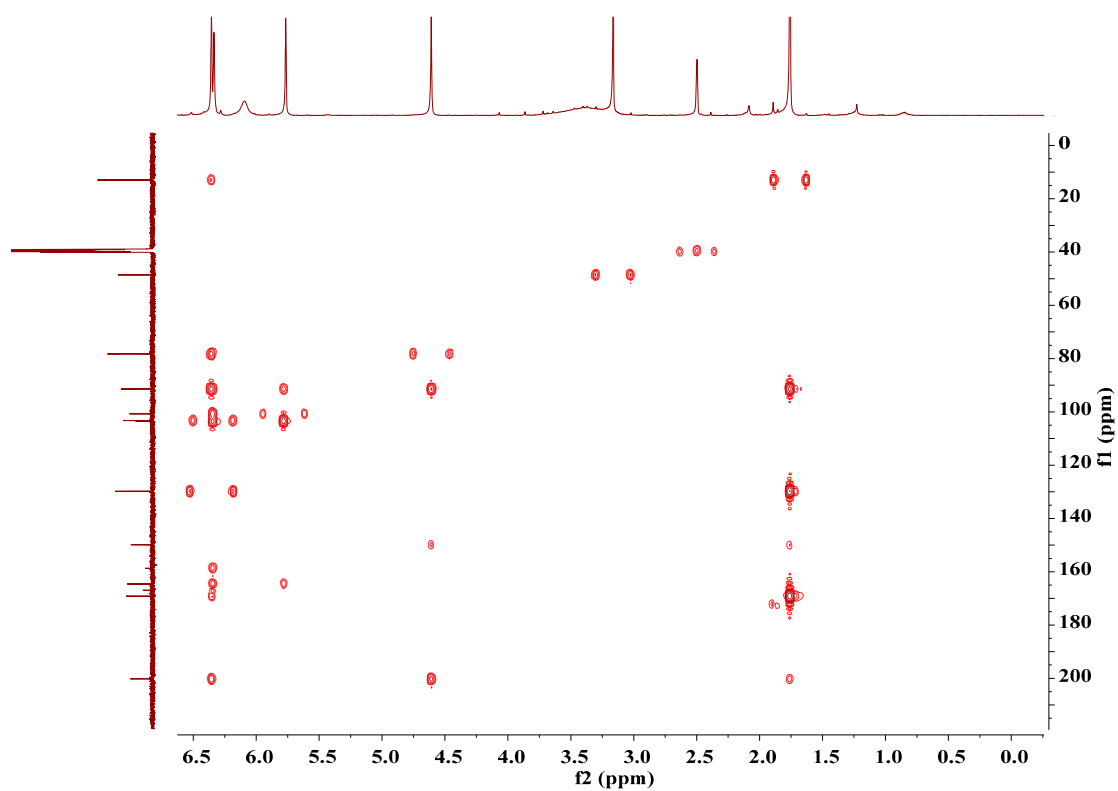

Figure S8. HMBC spectrum of (3*R*,5'*R*)-5-hydroxytalaroflavone (**1**)

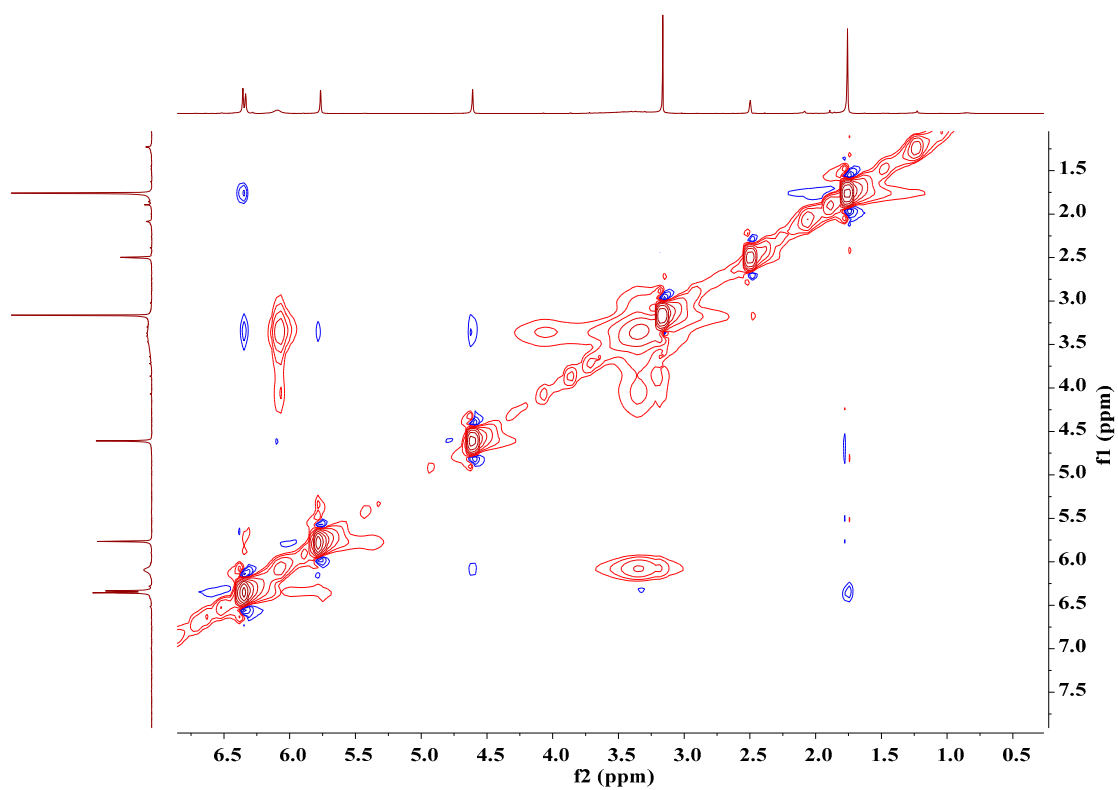

Figure S9. NOESY spectrum of (3*R*,5'*R*)-5-hydroxytalaroflavone (**1**)

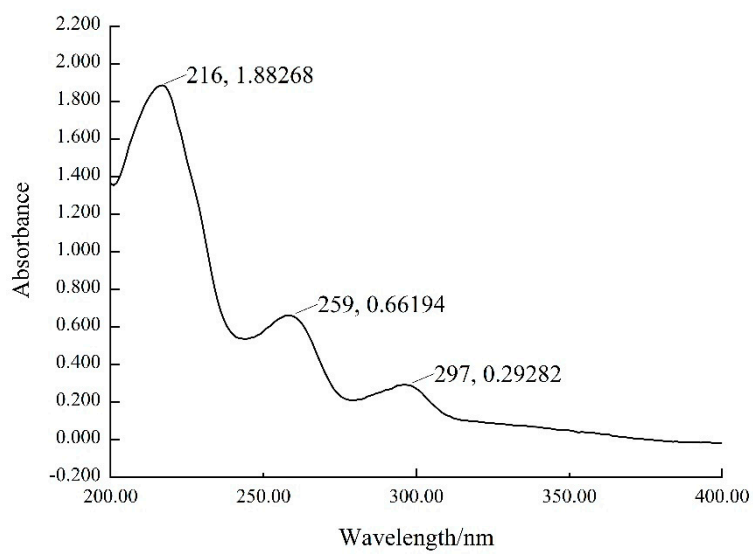

Figure S10. UV spectrum of (3*R*,5'*R*)-5-hydroxytalaroflavone (**1**)



20231016-CS258-I90A\_231017094309 #19 RT: 0.27 AV: 1 SB: 17 0.36-0.60 NL: 1.87E6  
T: FTMS - p ESI Full ms [200.00-1000.00]

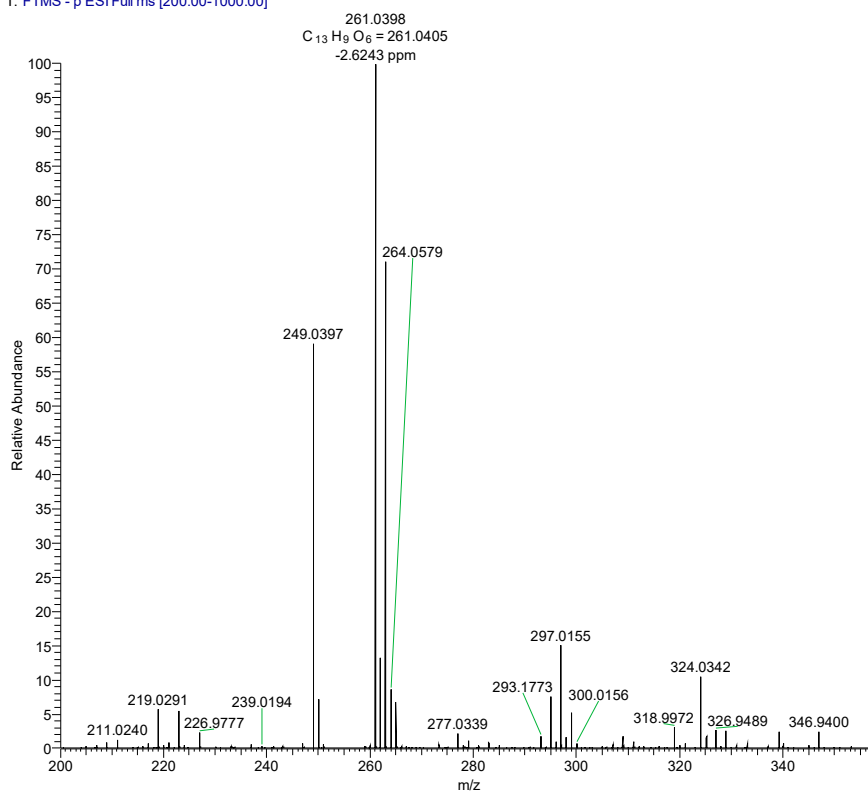

Figure S11. HRESIMS spectrum of talaroisochromenol A (**3**)

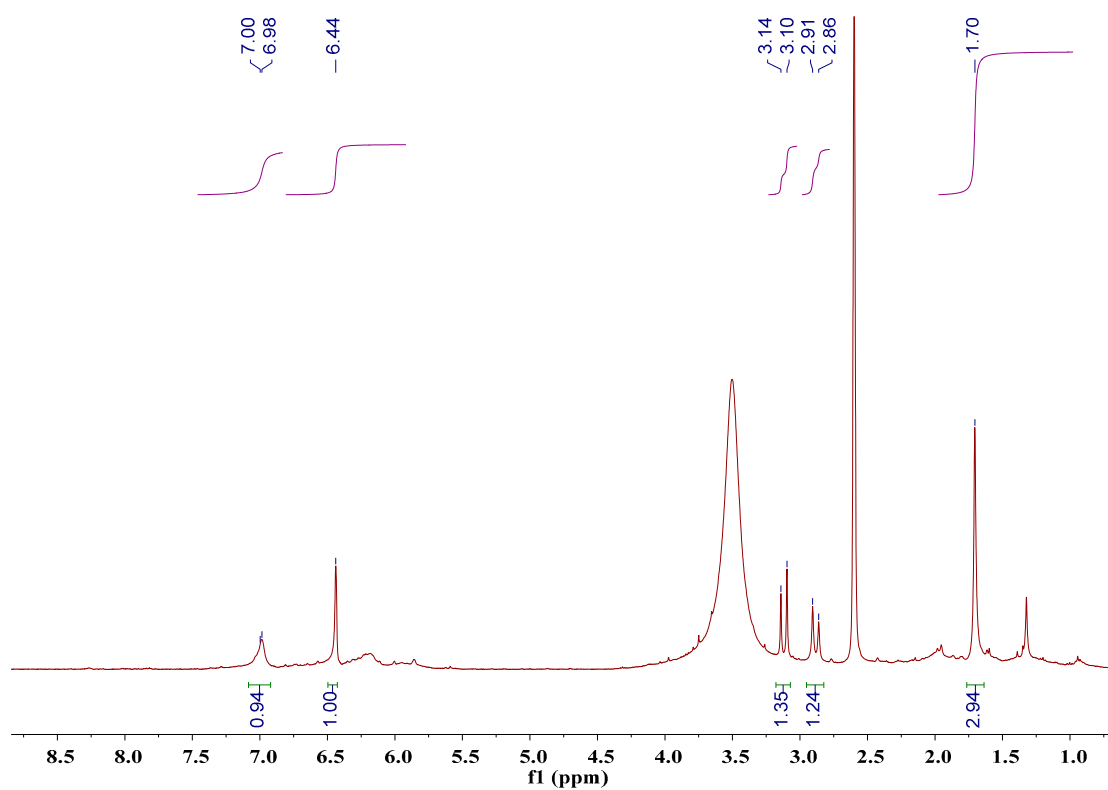

Figure S12. <sup>1</sup>H NMR spectrum (400 MHz, DMSO) of talaroisochromenol A (**3**)

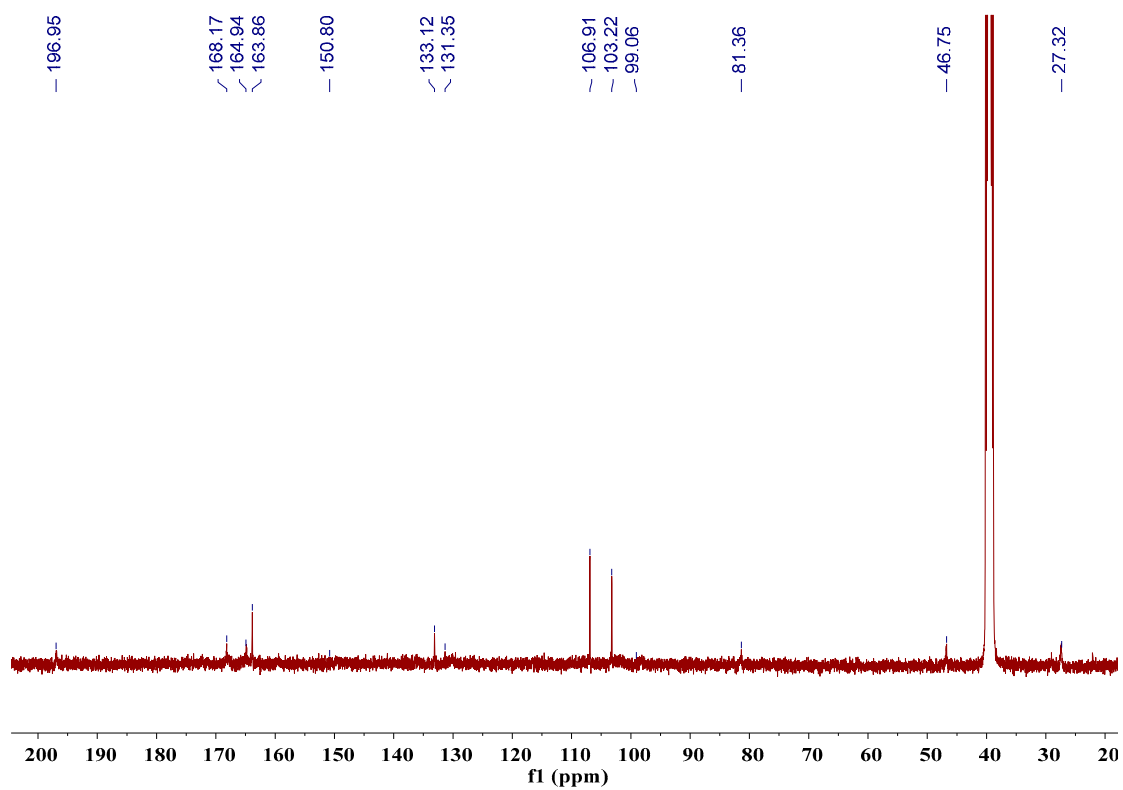

Figure S13.  $^{13}\text{C}$  NMR spectrum (100 MHz, DMSO) of talaroisochromenol A (**3**)

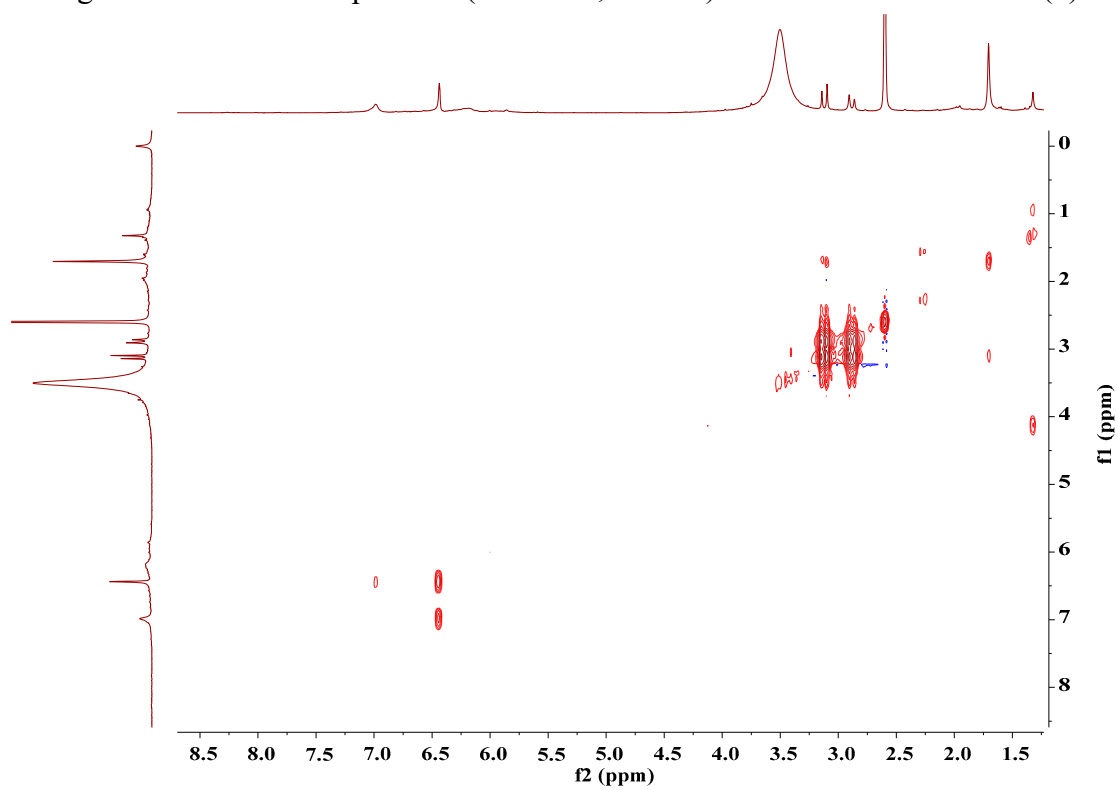

Figure S14.  $^1\text{H}$ - $^1\text{H}$  COSY spectrum of talaroisochromenol A (**3**)

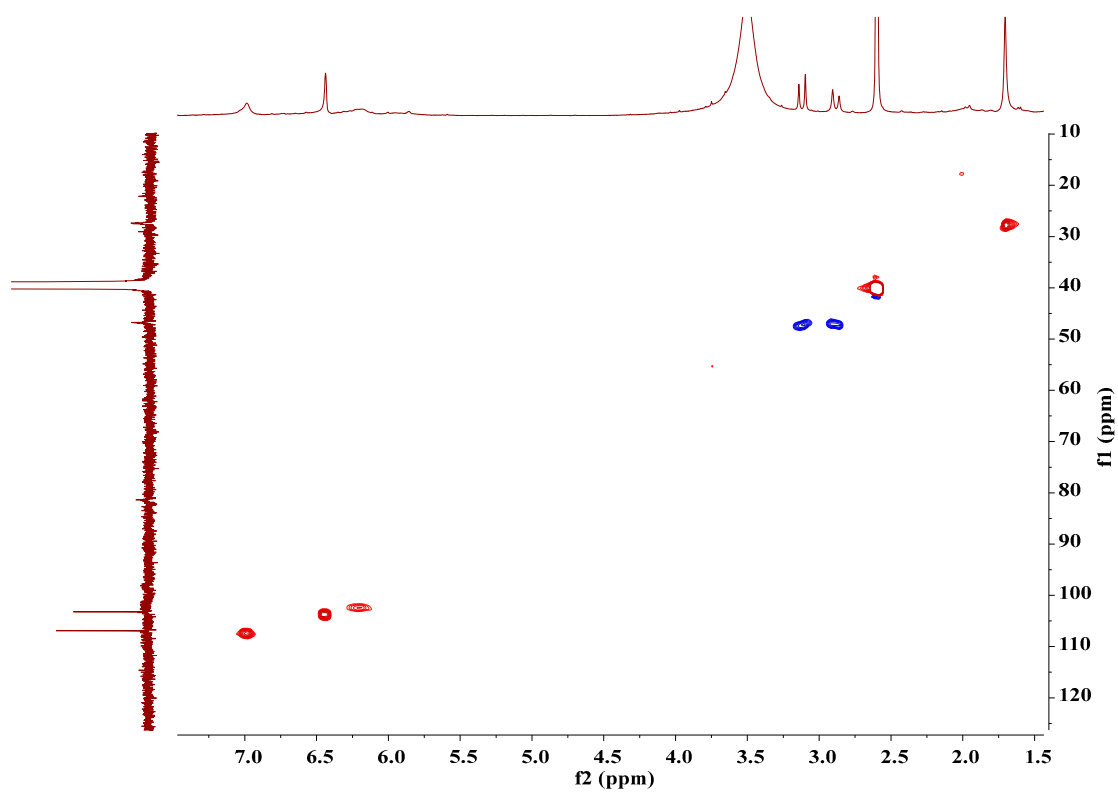

Figure S15. HSQC spectrum of talaroisochromenol A (**3**)

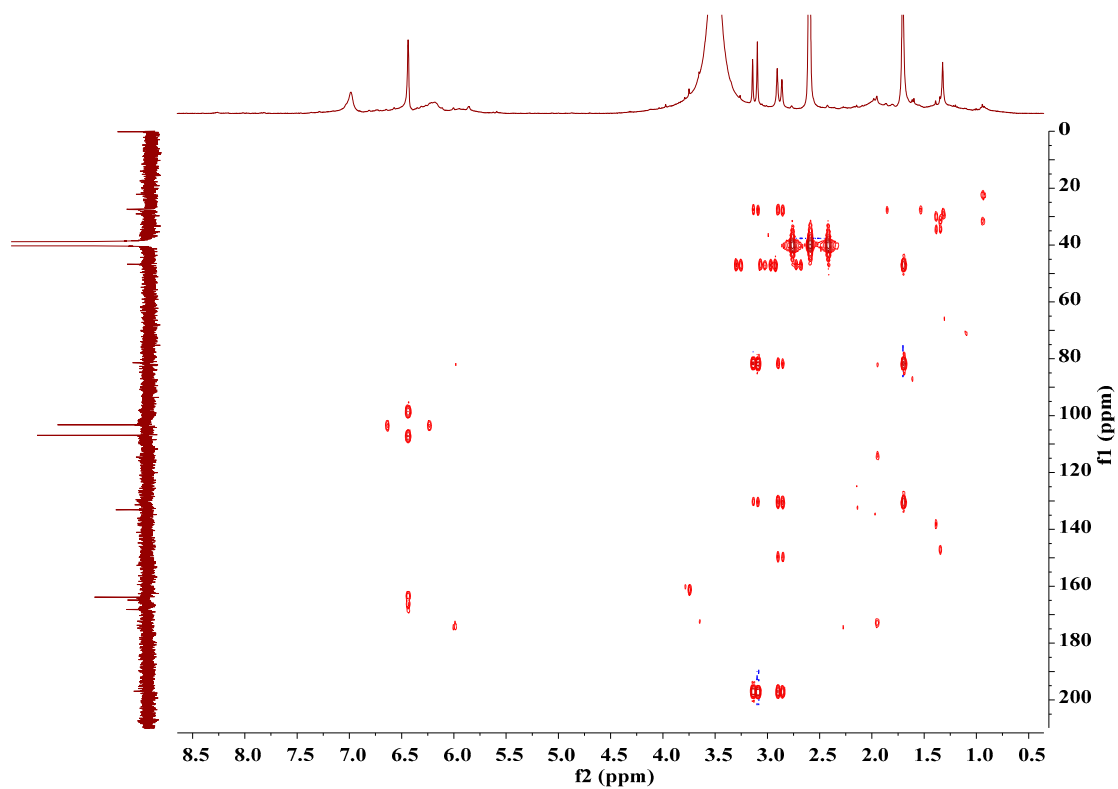

Figure S16. HMBC spectrum of talaroisochromenol A (**3**)

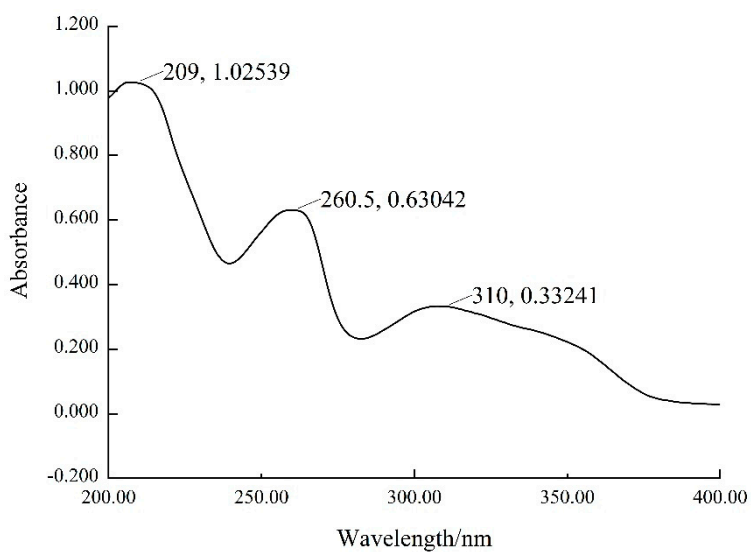

Figure S17. UV spectrum of talarisochromenol A (3)

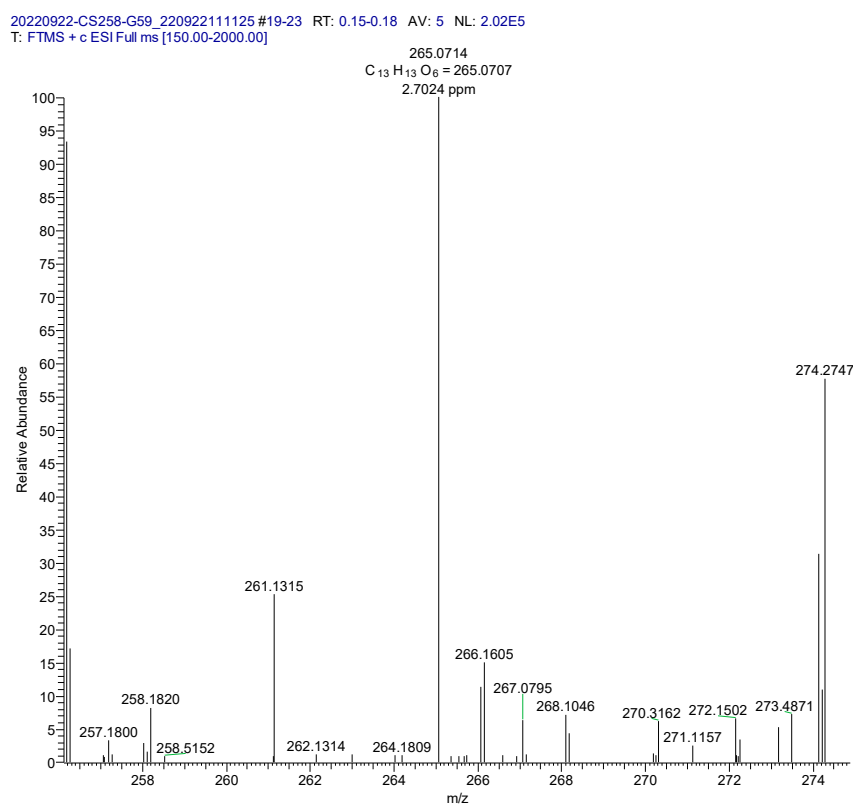

Figure S18. HRESIMS spectrum of talarisochromenol B (5)

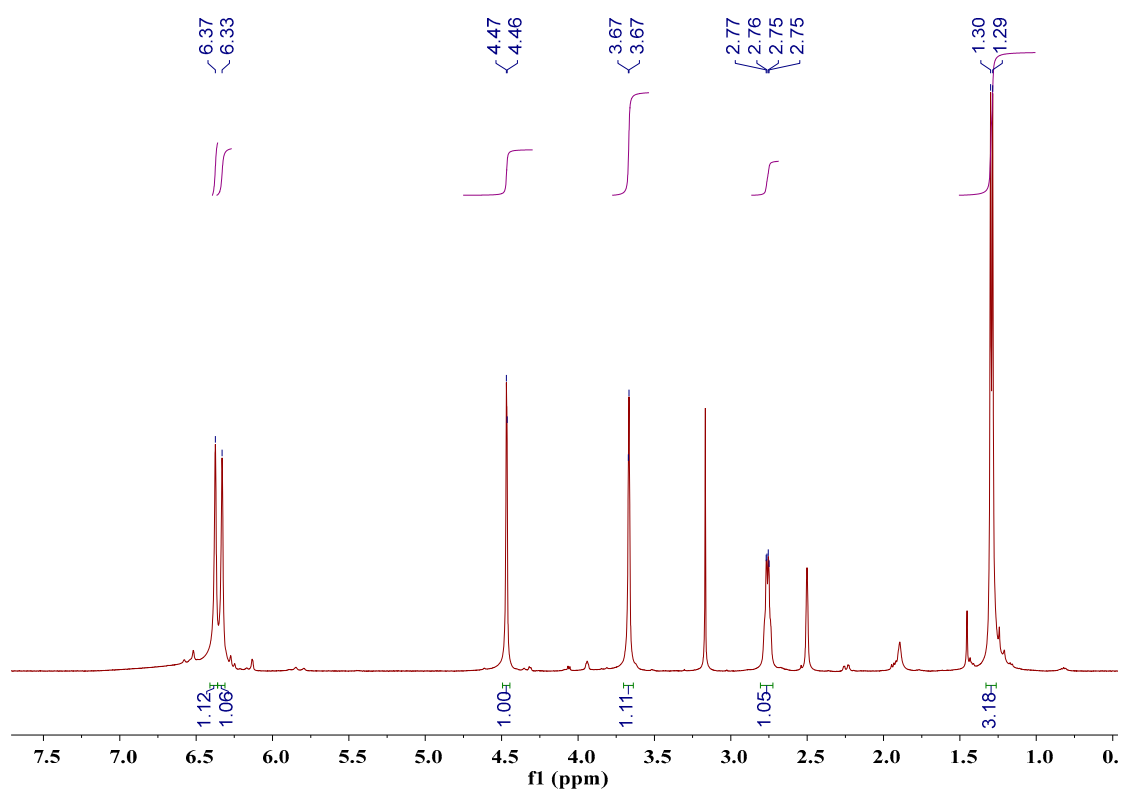

Figure S19. <sup>1</sup>H NMR spectrum (500 MHz, DMSO) of talaroisochromenol B (**5**)

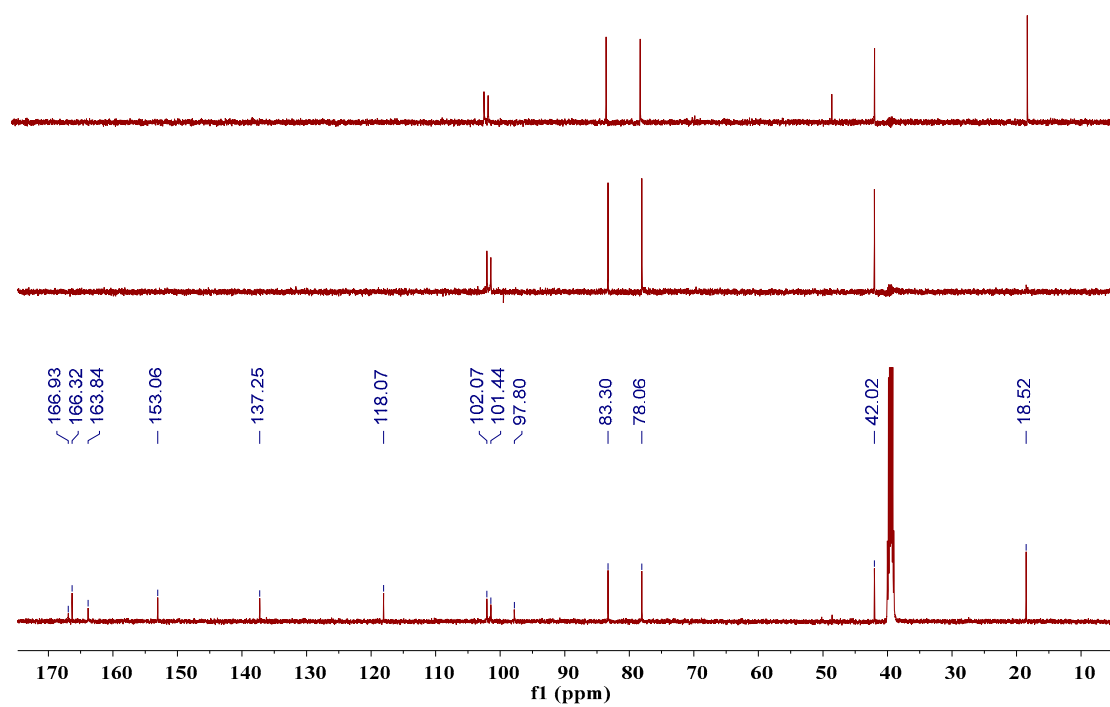

Figure S20. <sup>13</sup>C NMR spectrum (125 MHz, DMSO) of talaroisochromenol B (**5**)

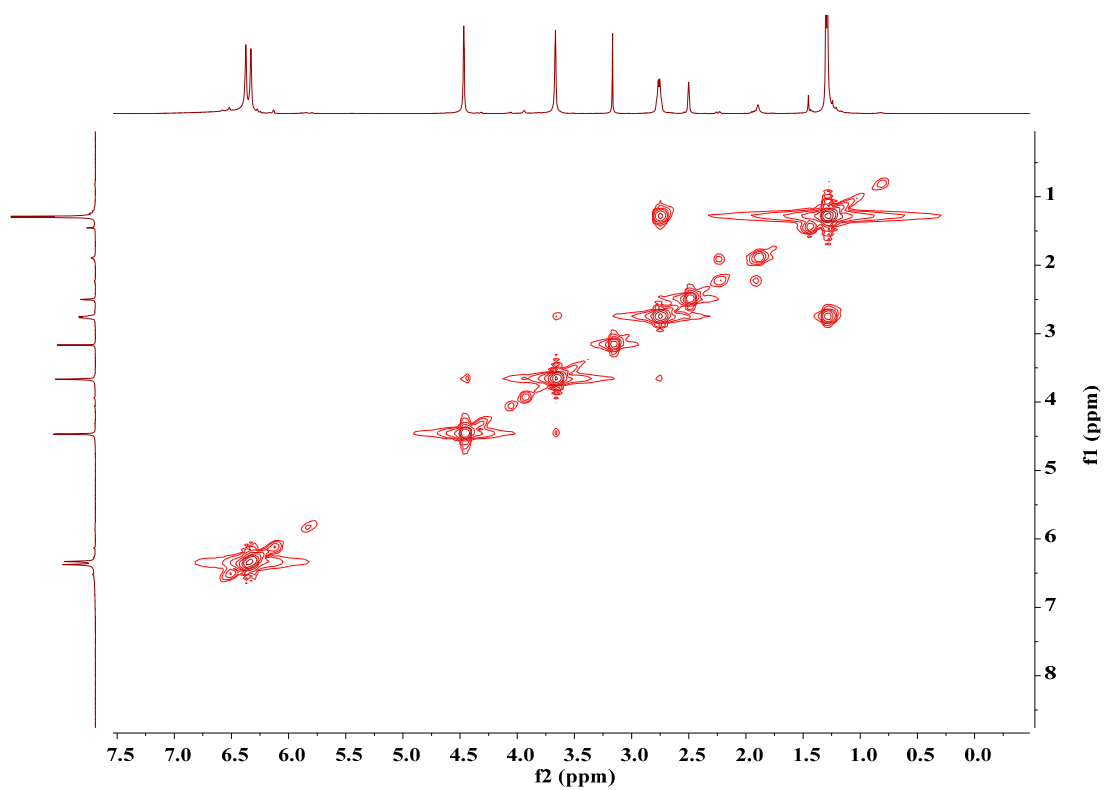

Figure S21.  $^1\text{H}$ - $^1\text{H}$  COSY spectrum of talaroisochromenol B (**5**)

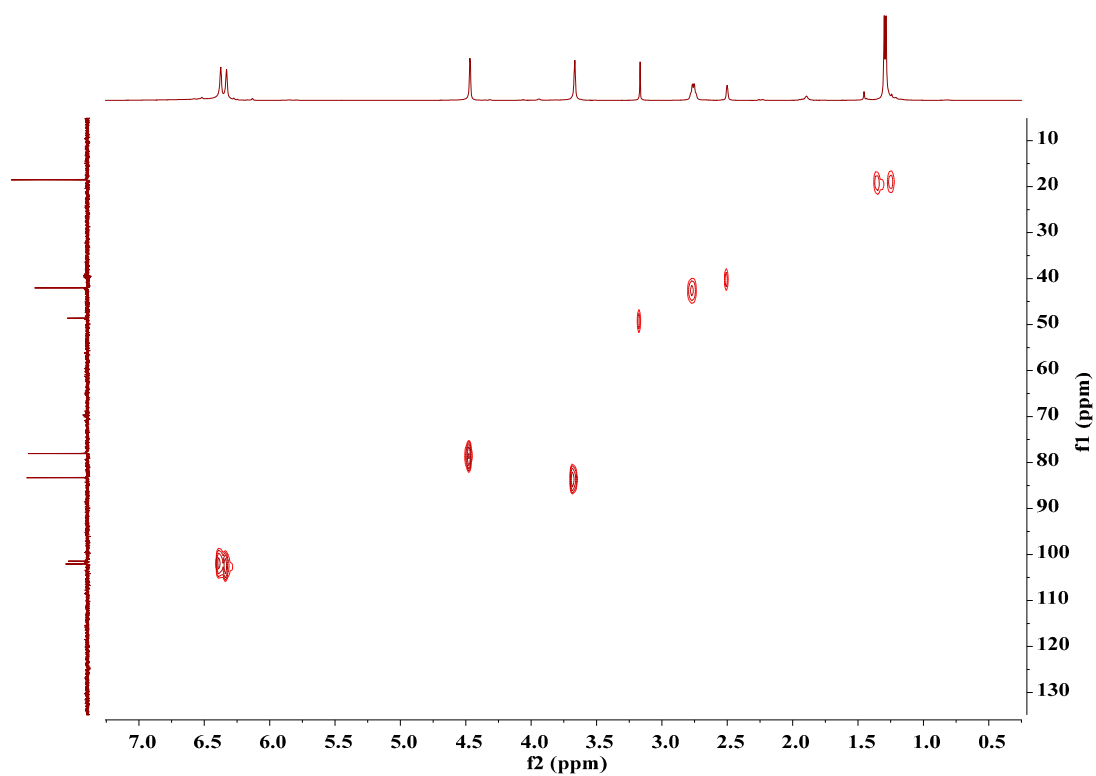

Figure S22. HSQC spectrum of talaroisochromenol B (**5**)

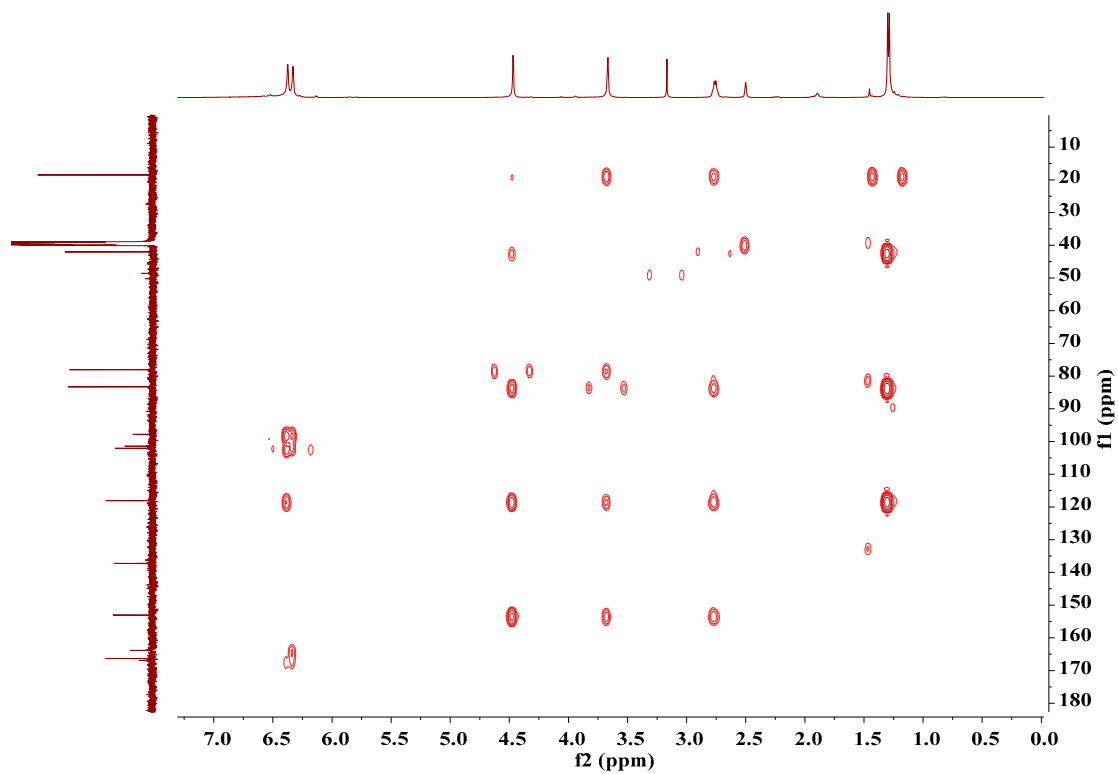

Figure S23. HMBC spectrum of talaroisochromenol B (**5**)

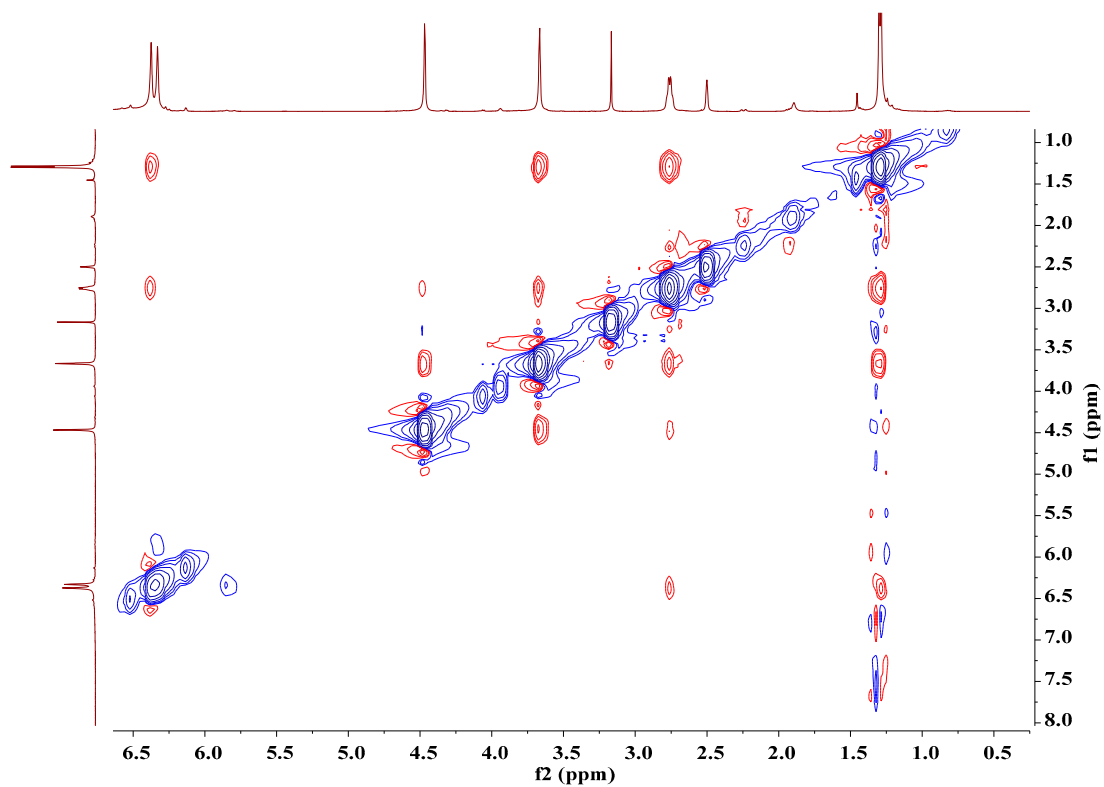

Figure S24. NOESY spectrum of talaroisochromenol B (**5**)

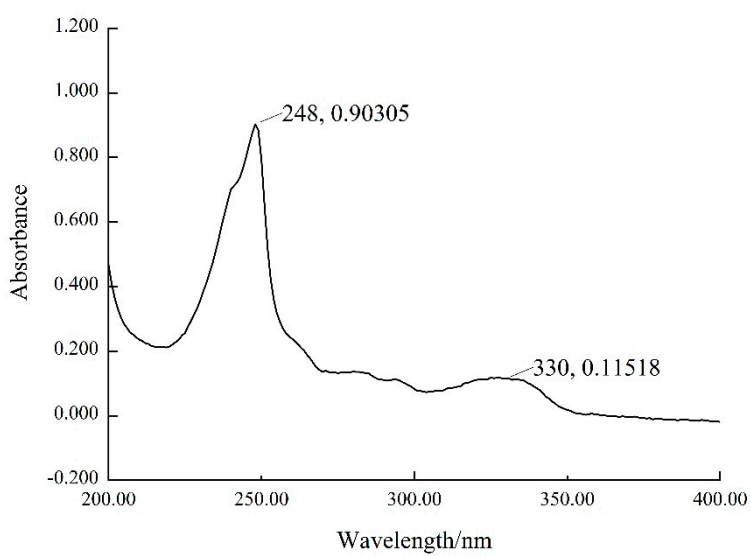

Figure S25. UV spectrum of talarisochromenol B (5)

20221102-CS258G-66\_221031091830 #77-79 RT: 0.64-0.66 AV: 3 SB: 21 0.01-0.18 NL: 8.50E4  
T: FTMS + p ESI Full ms [180.00-1000.00]

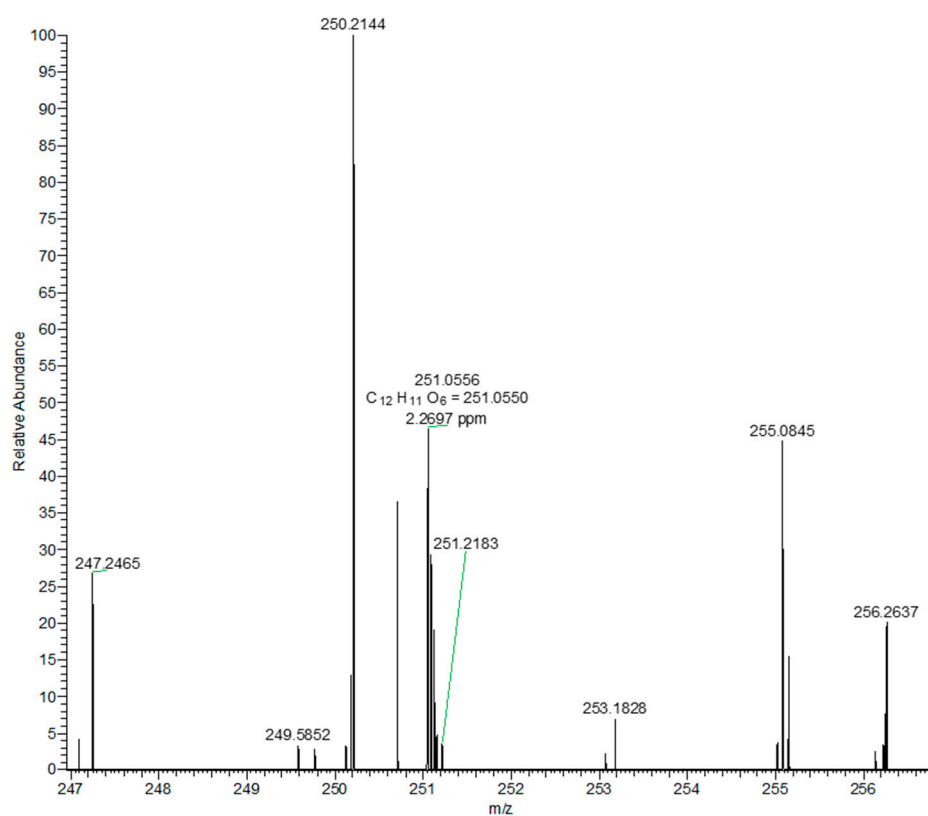

Figure S26. HRESIMS spectrum of talarisochromenol C (11)



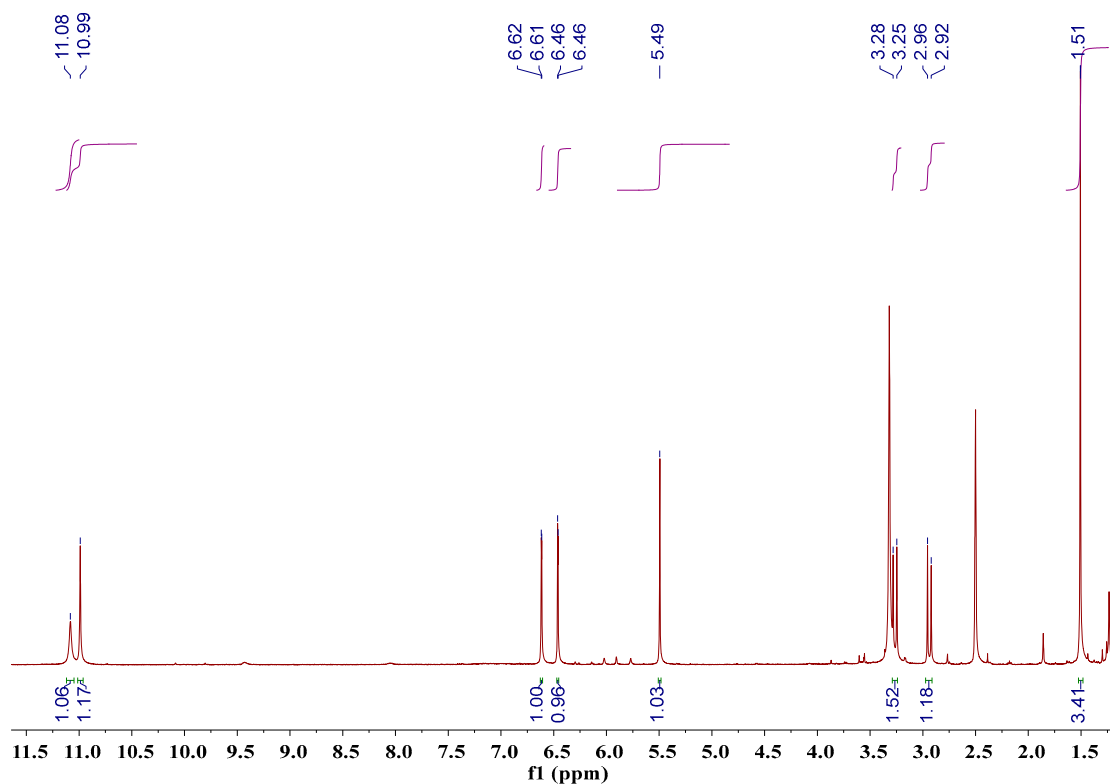

Figure S27. <sup>1</sup>H NMR spectrum (500 MHz, DMSO) of talaroisochromenol C (**11**)

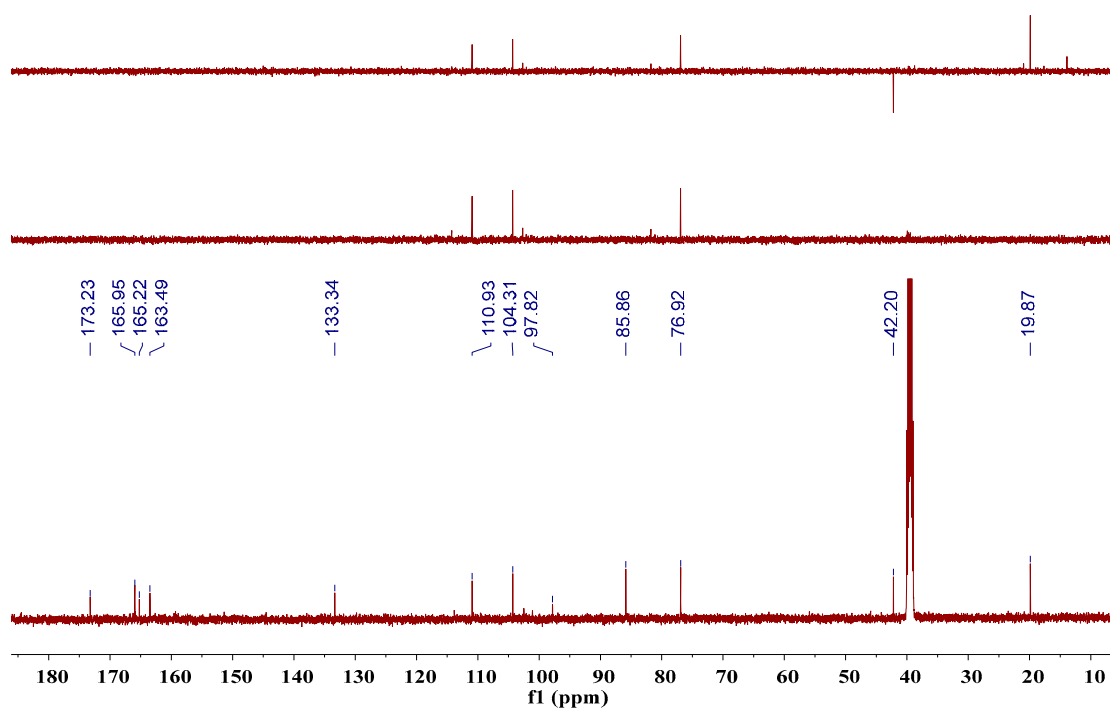

Figure S28. <sup>13</sup>C NMR spectrum (125 MHz, DMSO) of talaroisochromenol C (**11**)

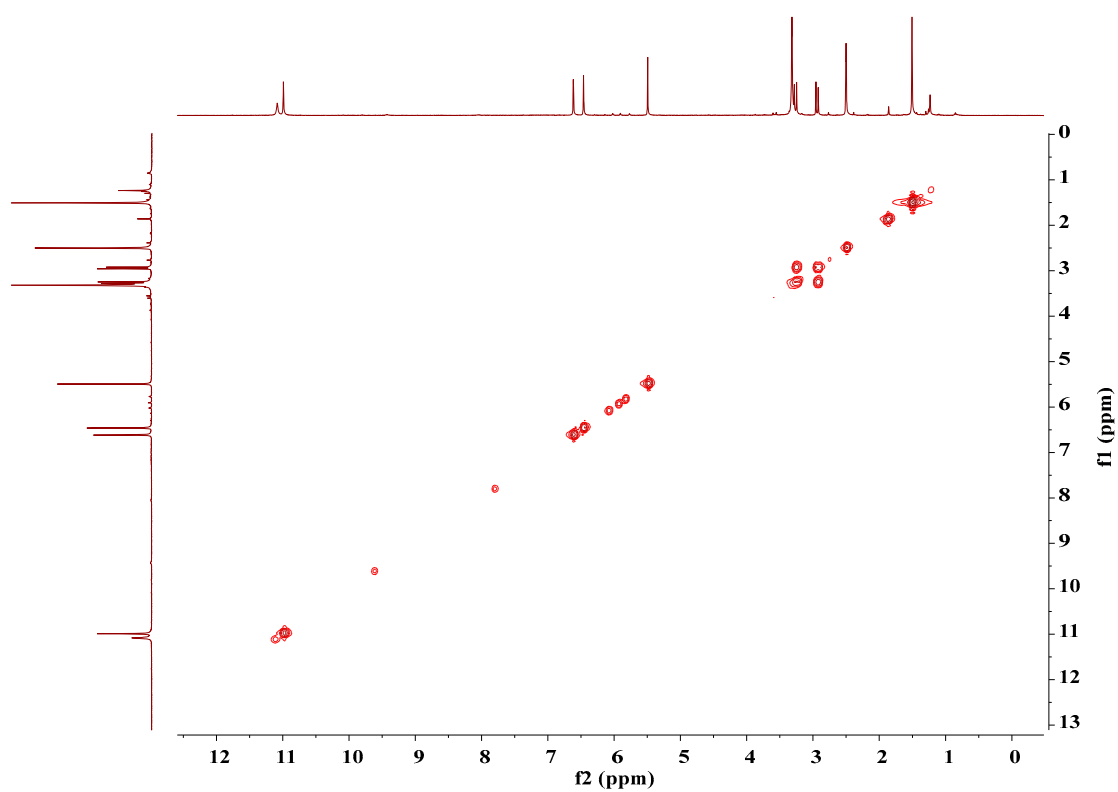

Figure S29.  $^1\text{H}$ - $^1\text{H}$  COSY spectrum of talaroisochromenol C (**11**)

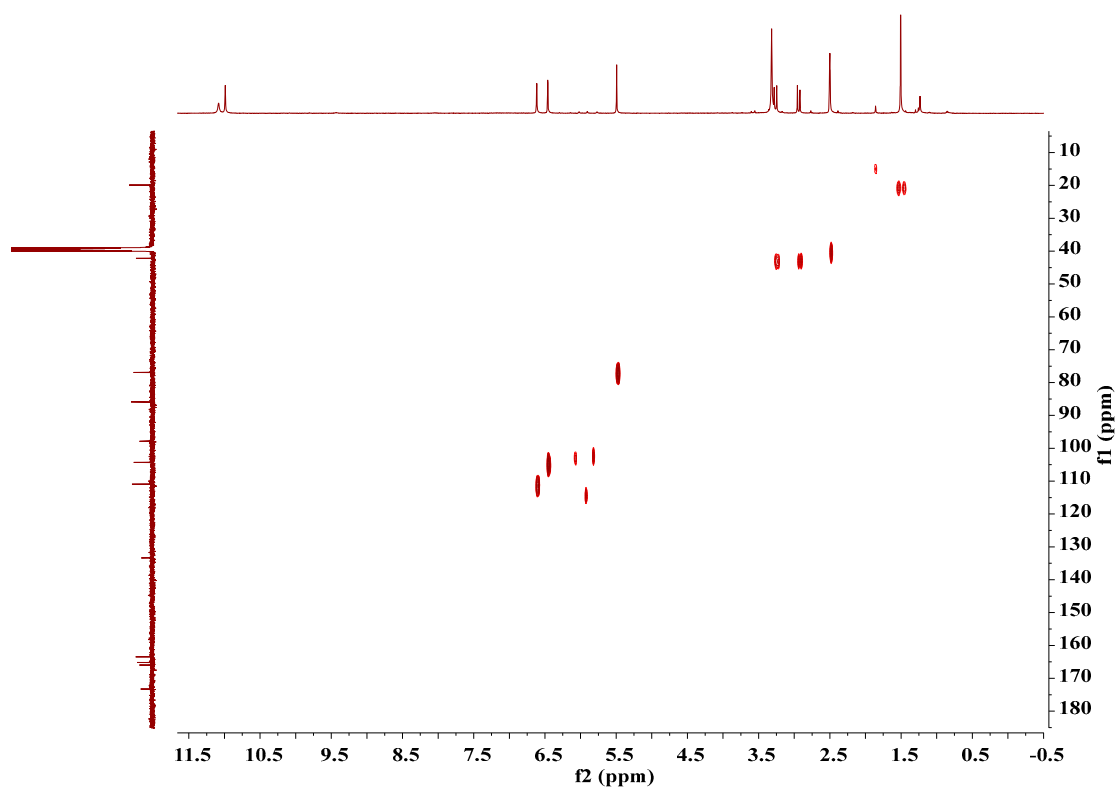

Figure S30. HSQC spectrum of talaroisochromenol C (**11**)

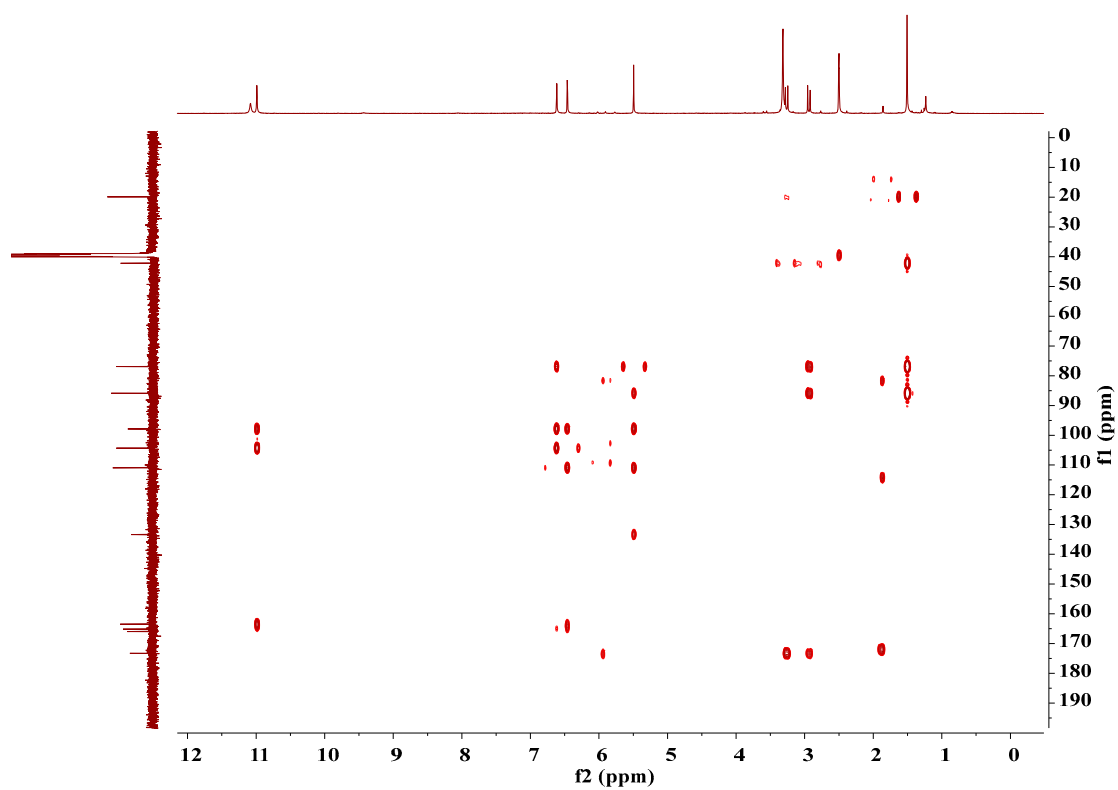

Figure S31. HMBC spectrum of talaroisochromenol C (**11**)

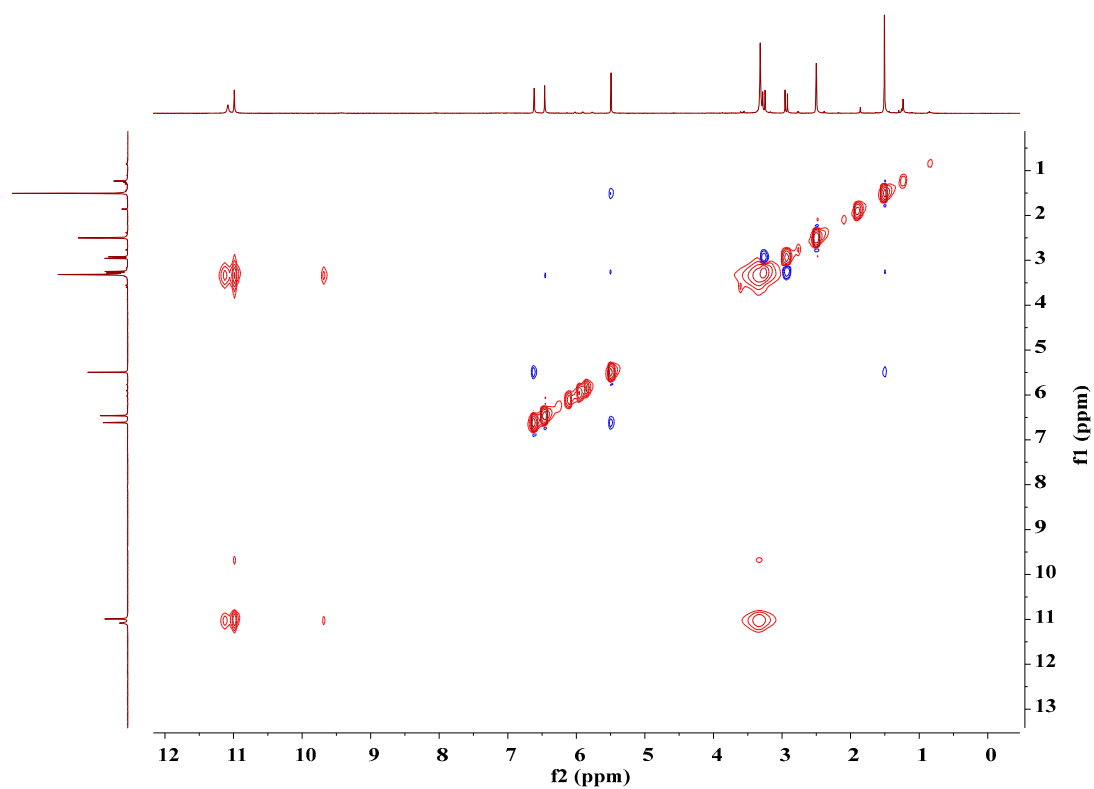

Figure S32. NOESY spectrum of talaroisochromenol C (**11**)

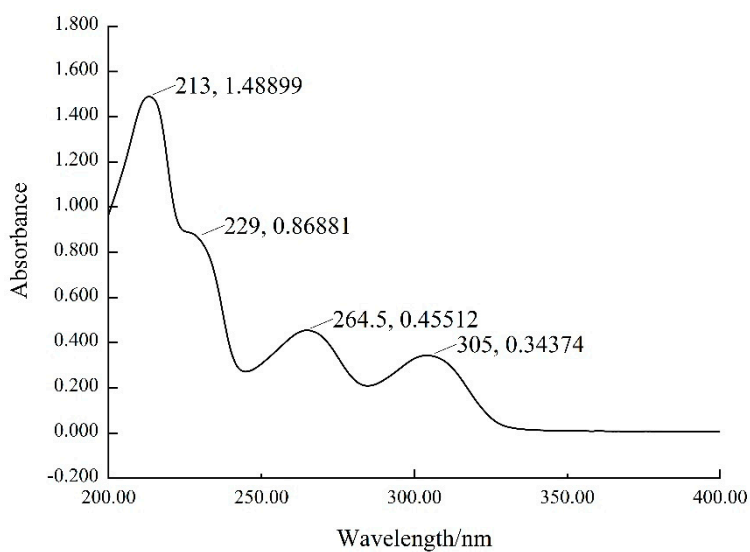

Figure S33. UV spectrum of talaroisochromenol C (**11**)

20220922-CS258-G69\_220922114120 #58-59 RT: 0.82-0.83 AV: 2 SB: 11 0.07-0.22 NL: 6.77E5  
T: FTMS + p ESI Full ms [150.00-2000.00]

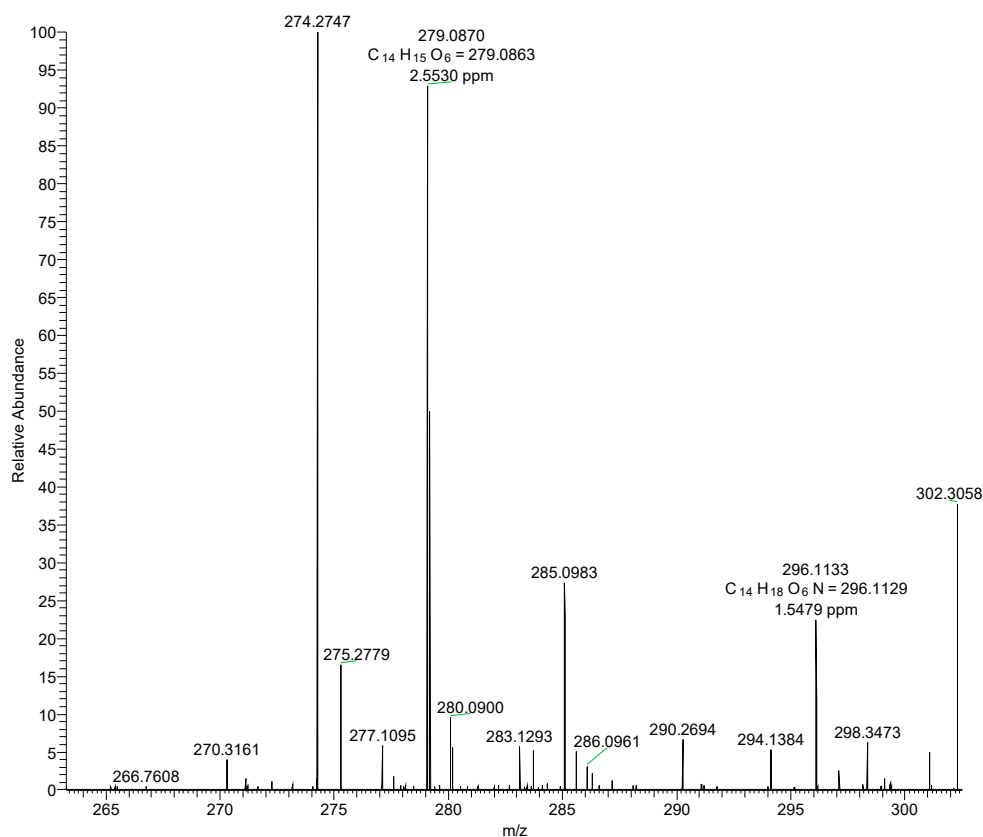

Figure S34. HRESIMS spectrum of (8R,9R,10aR)-5-hydroxyaltenuene (**13**)

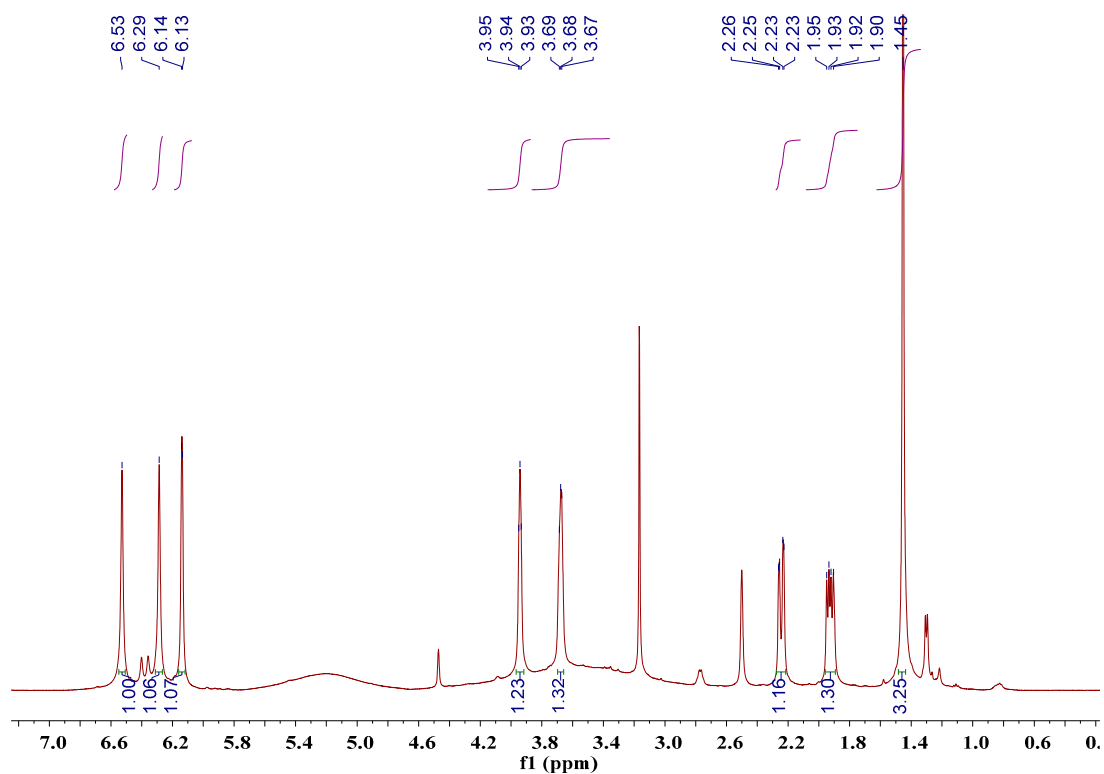

Figure S35. <sup>1</sup>H NMR spectrum (500 MHz, DMSO) of (8*R*,9*R*,10*aR*)-5-hydroxyaltenuene (**13**)

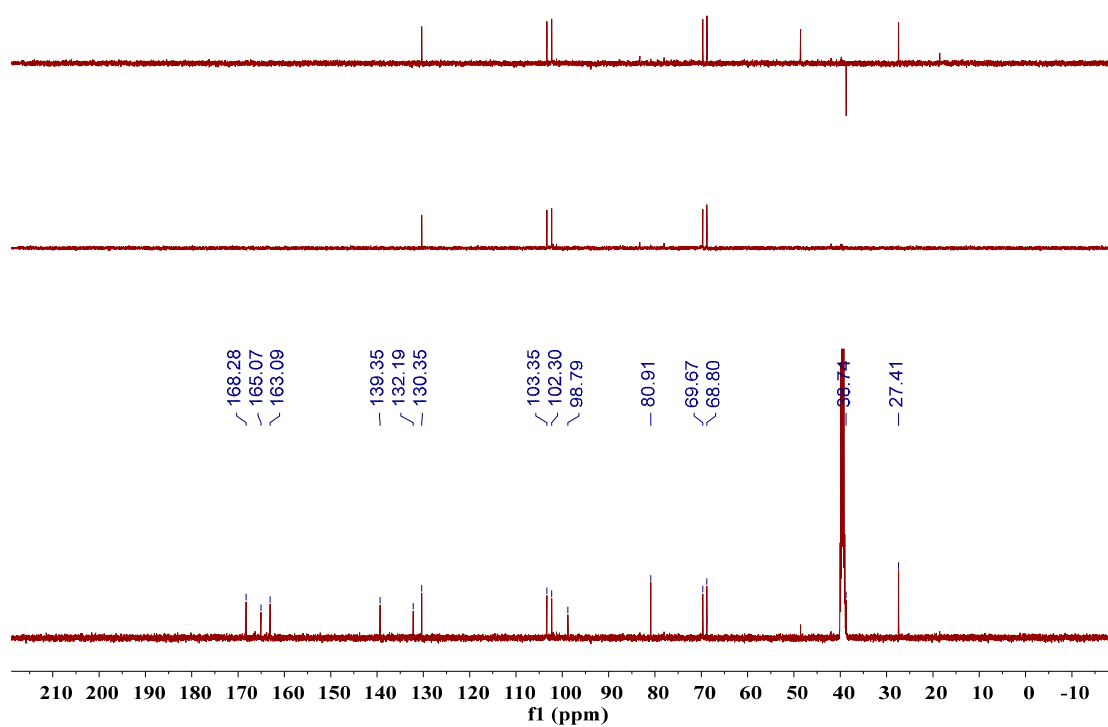

Figure S36. <sup>13</sup>C NMR spectrum (125 MHz, DMSO) of (8*R*,9*R*,10*aR*)-5-hydroxyaltenuene (**13**)

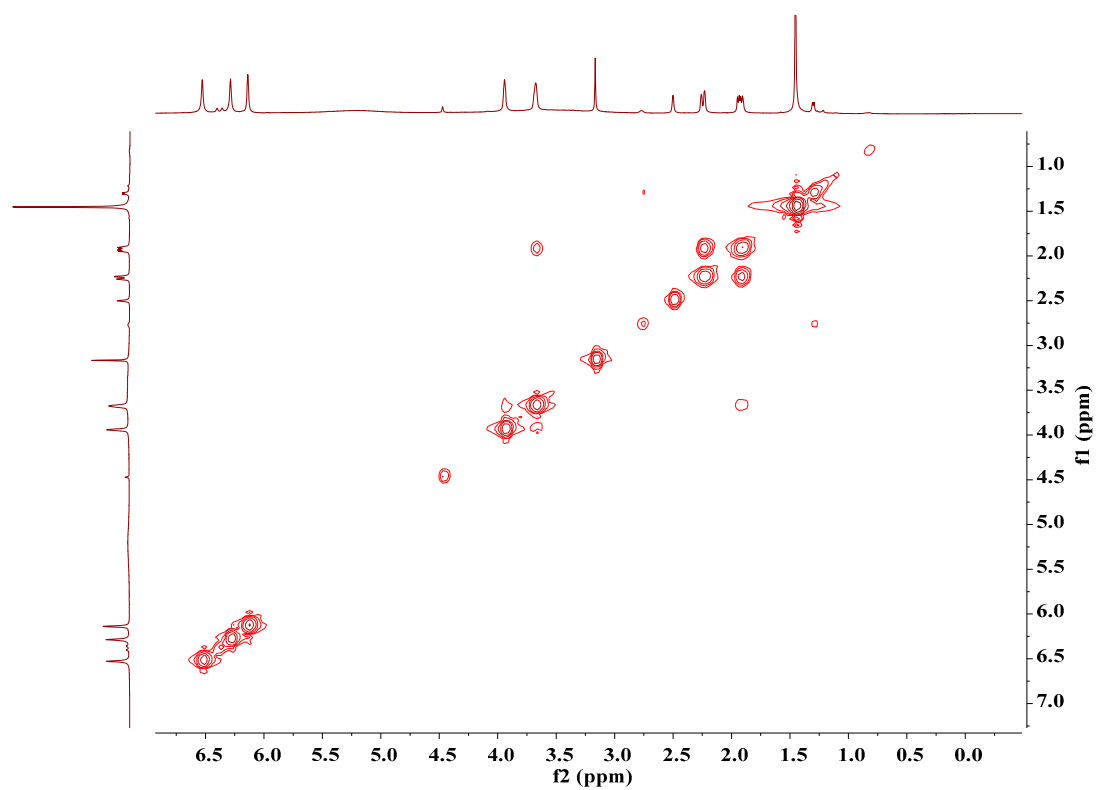

Figure S37.  $^1\text{H}$ - $^1\text{H}$  COSY spectrum of (8*R*,9*R*,10*aR*)-5-hydroxyaltenuene (**13**)

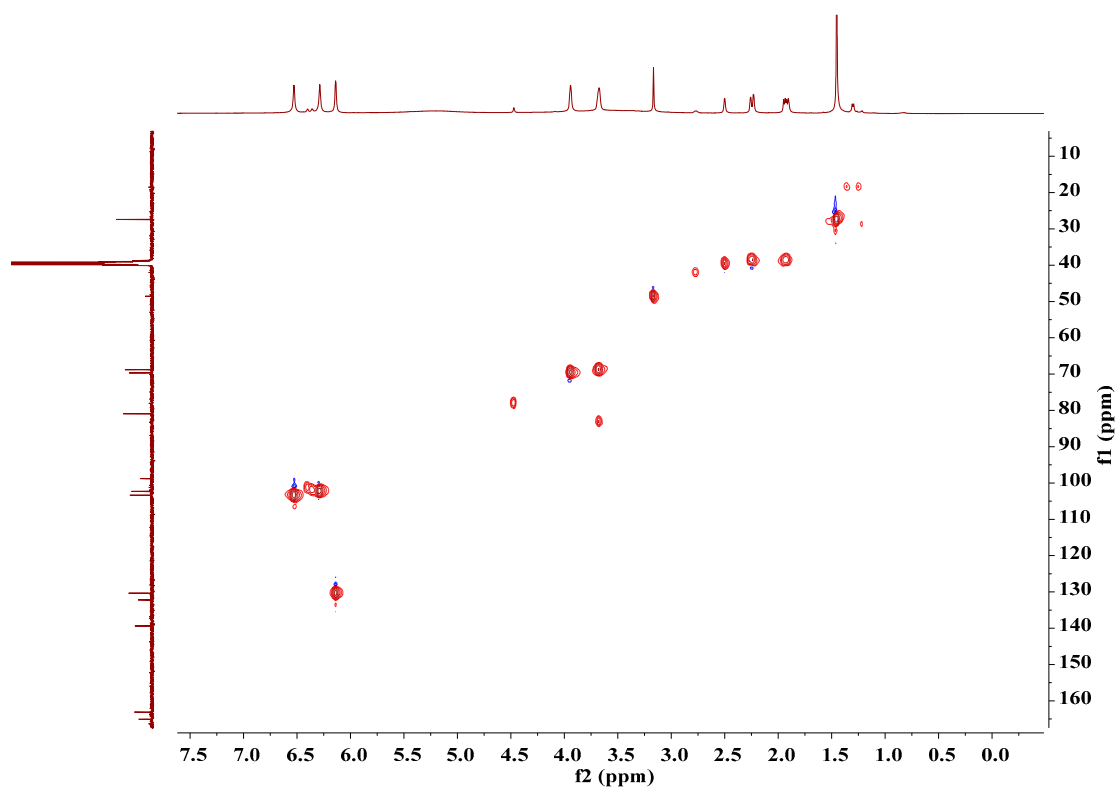

Figure S38. HSQC spectrum of (8*R*,9*R*,10*aR*)-5-hydroxyaltenuene (**13**)

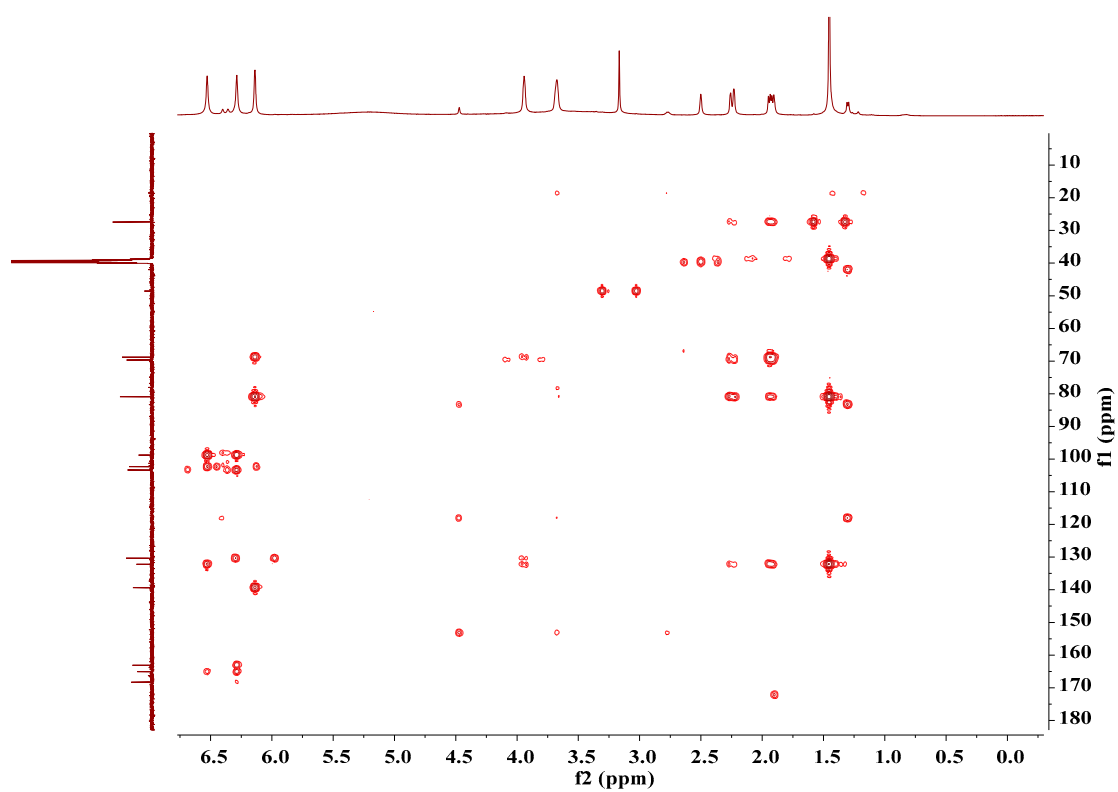

Figure S39. HMBC spectrum of (8*R*,9*R*,10*aR*)-5-hydroxyaltenuene (**13**)

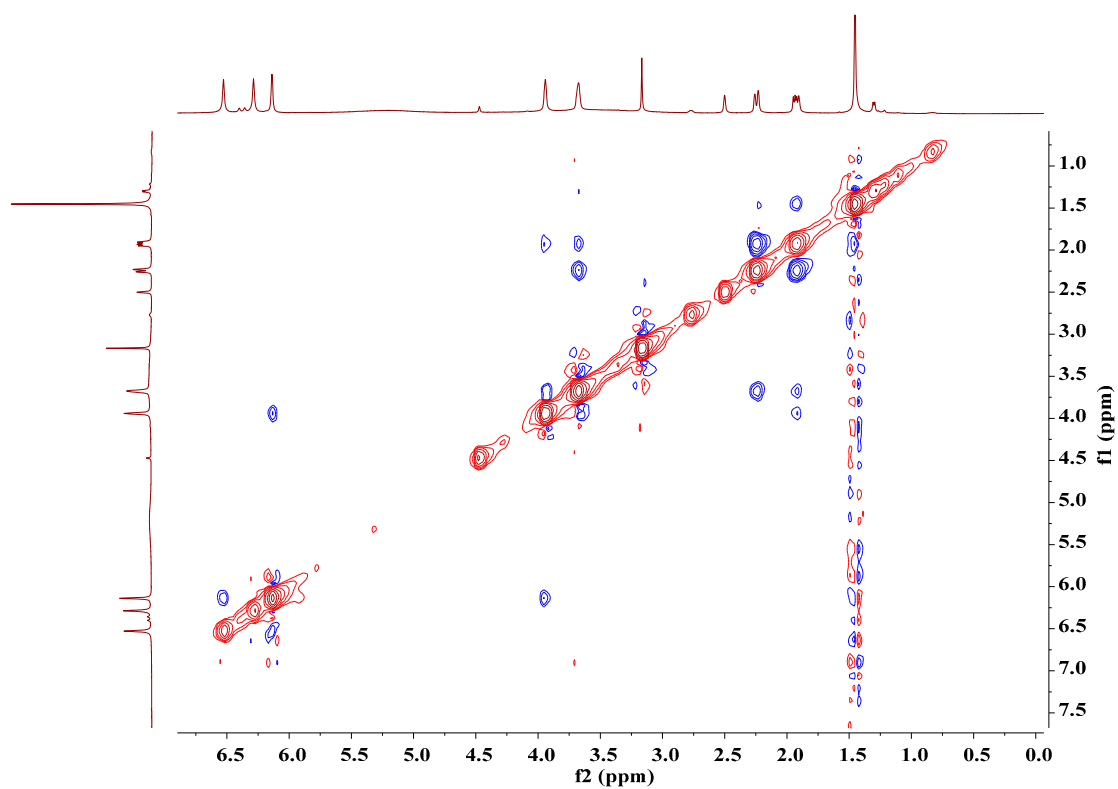

Figure S40. NOESY spectrum of (8*R*,9*R*,10*aR*)-5-hydroxyaltenuene (**13**)

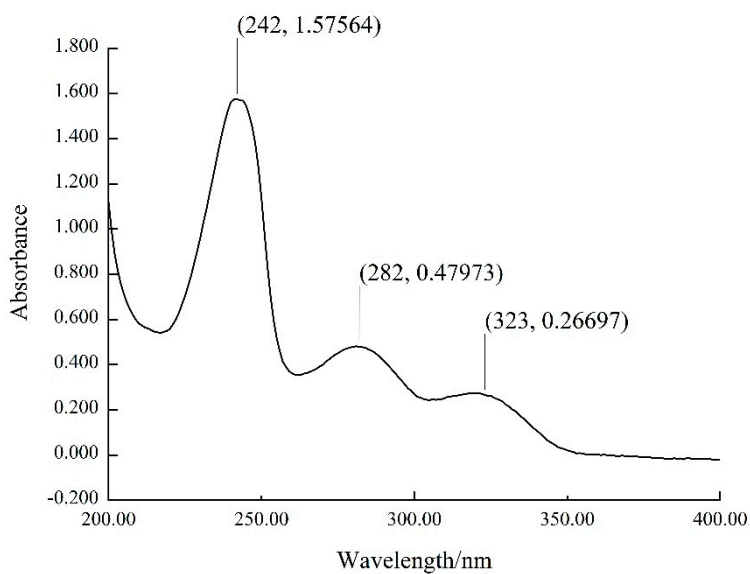

Figure S41. UV spectrum of (8R,9R,10aR)-5-hydroxyaltenuene (**13**)

20221102-CS258I-97\_221031091830 #34-36 RT: 0.29-0.31 AV: 3 SB: 16 0.00-0.14 NL: 1.70E6  
T: FTMS + p ESI Full ms [180.00-1000.00]

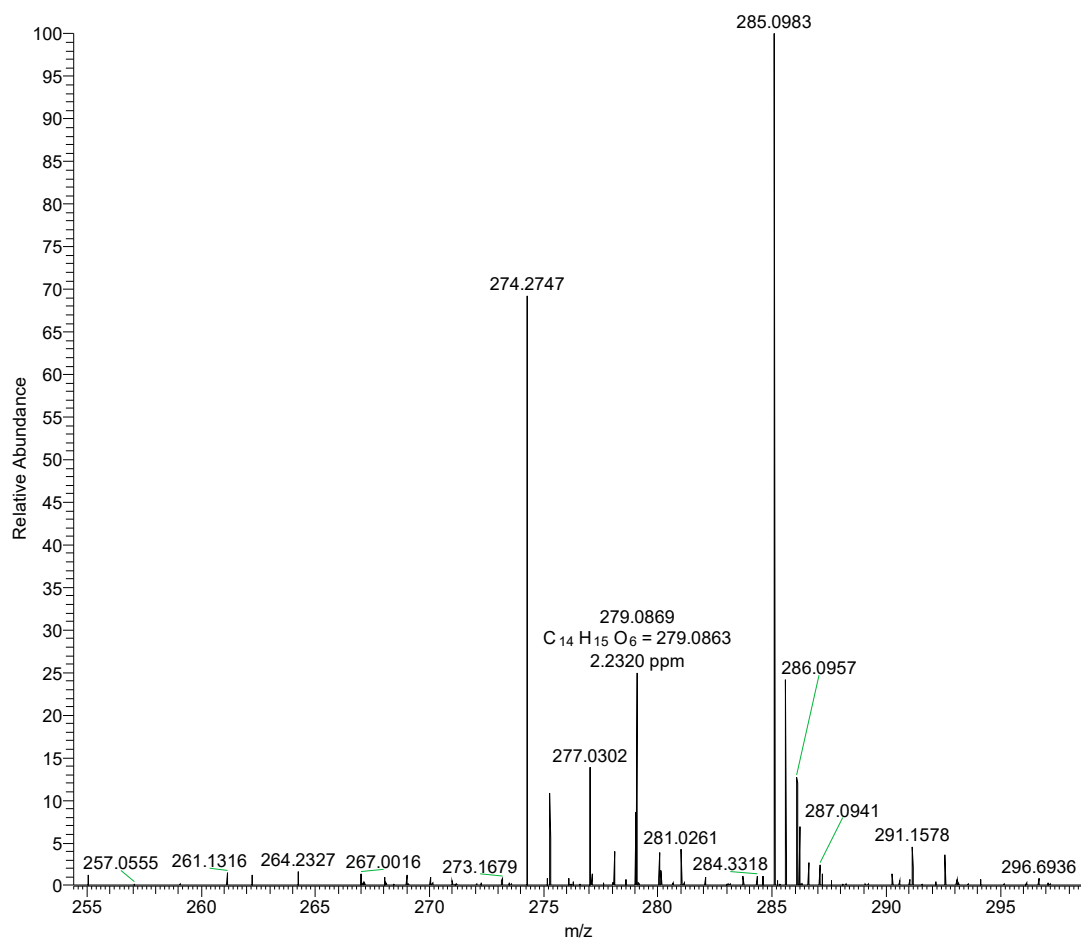

Figure S42. HRESIMS spectrum of (8R,9R,10aS)-5-hydroxyaltenuene (**14**)



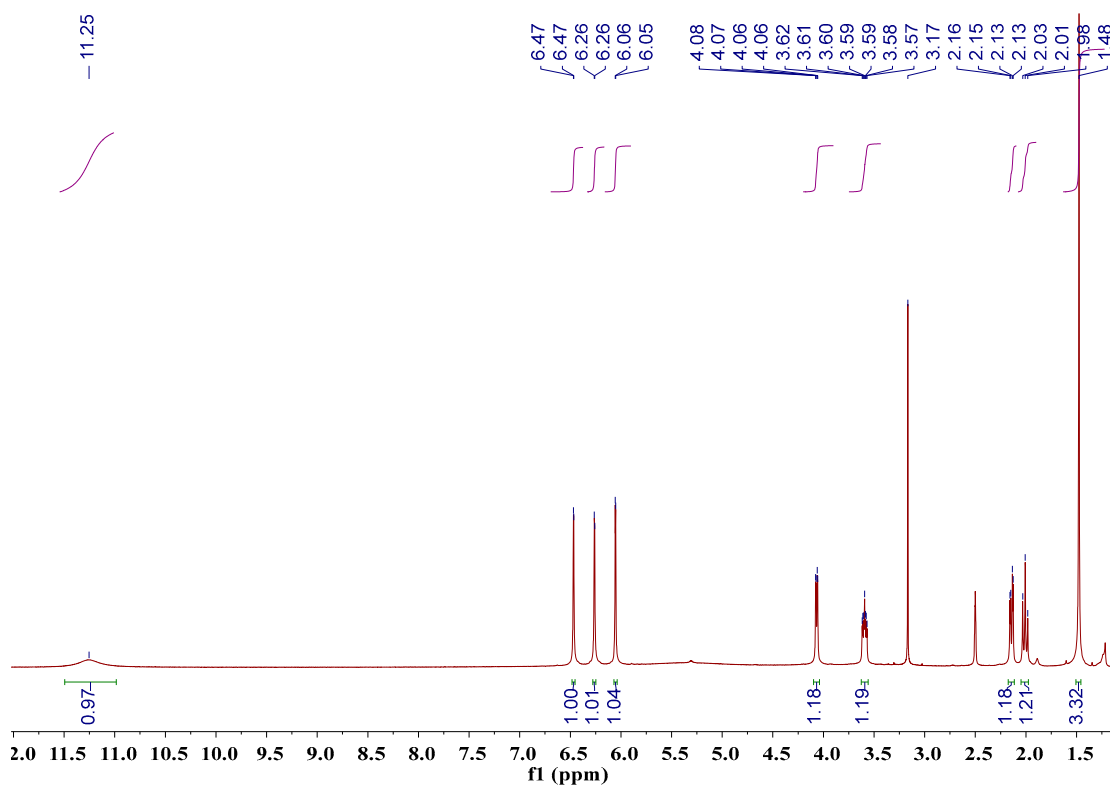

Figure S43. <sup>1</sup>H NMR spectrum (500 MHz, DMSO) of (8*R*,9*R*,10*aS*)-5-hydroxyaltenuene (**14**)

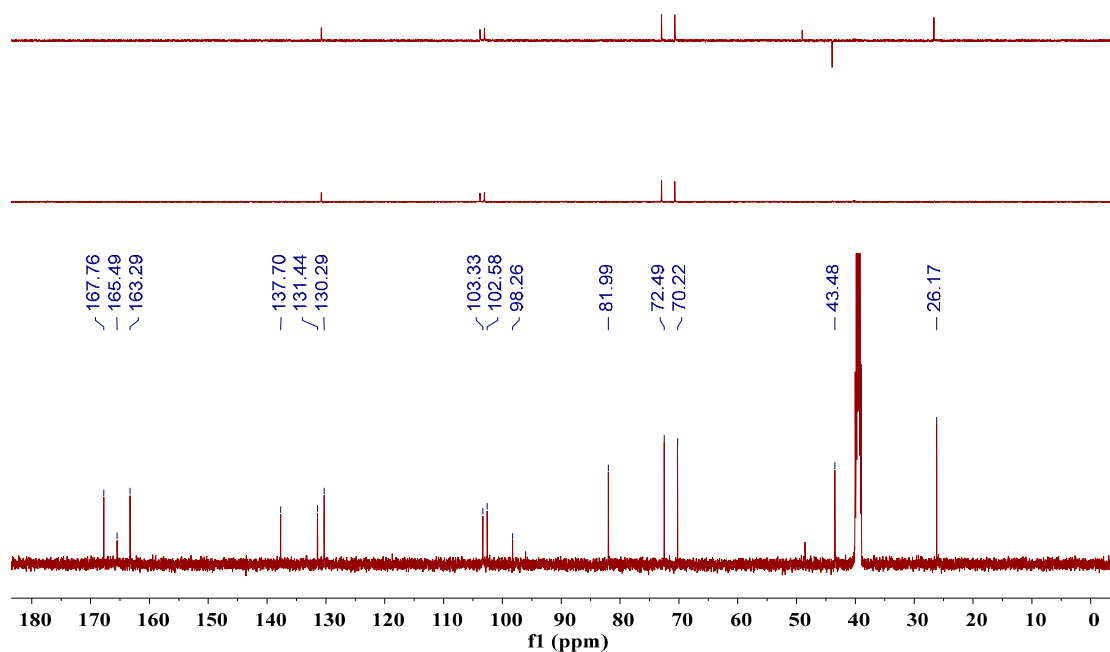

Figure S44. <sup>13</sup>C NMR spectrum (125 MHz, DMSO) of (8*R*,9*R*,10*aS*)-5-hydroxyaltenuene (**14**)

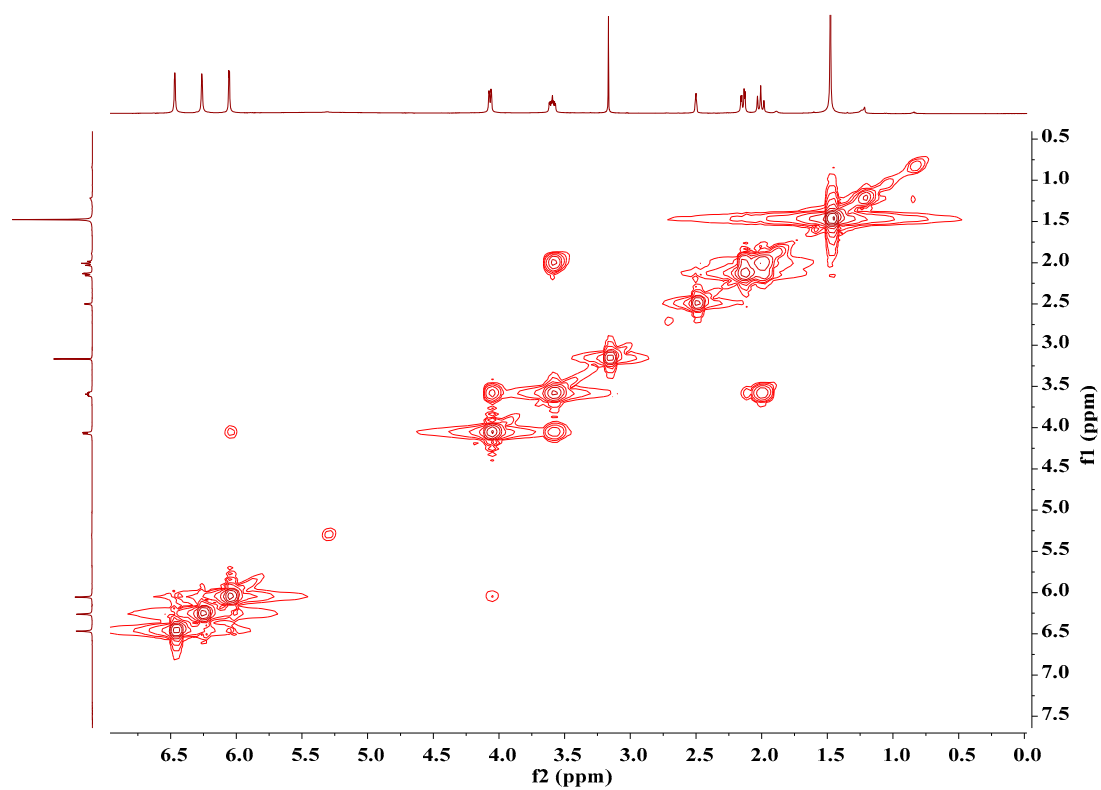

Figure S45.  $^1\text{H}$ - $^1\text{H}$  COSY spectrum of (8*R*,9*R*,10*aS*)-5-hydroxyaltenuene (**14**)

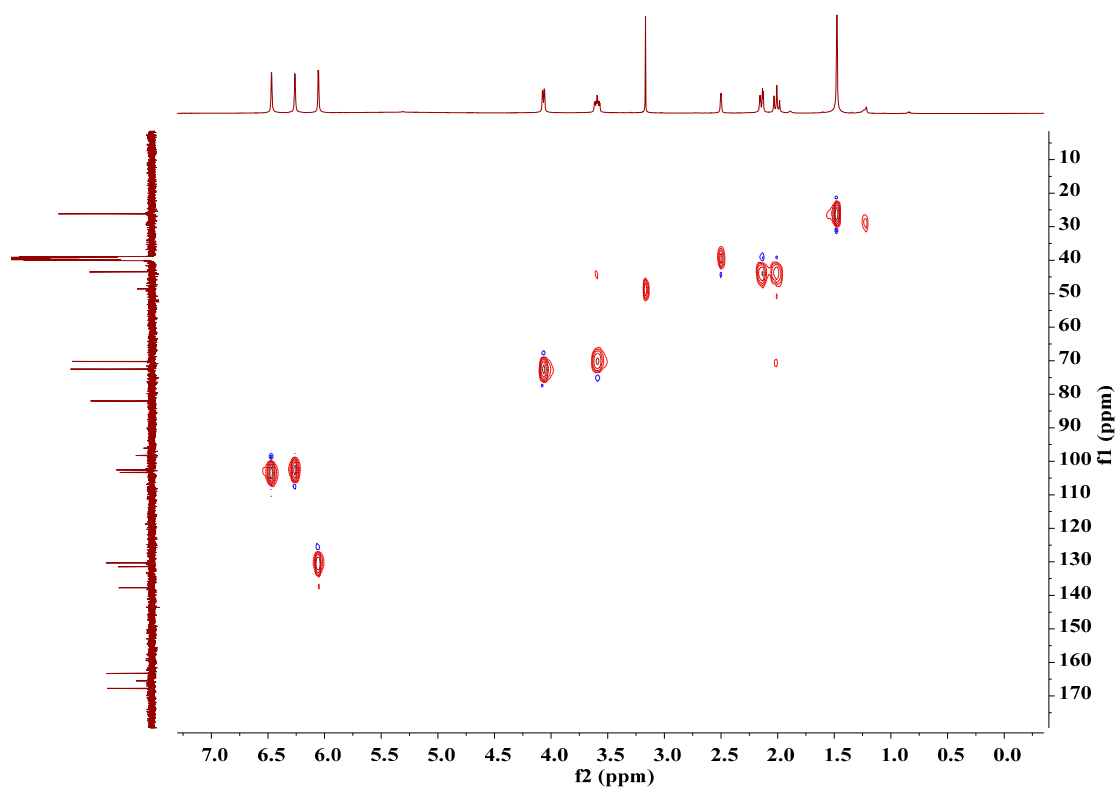

Figure S46. HSQC spectrum of (8*R*,9*R*,10*aS*)-5-hydroxyaltenuene (**14**)

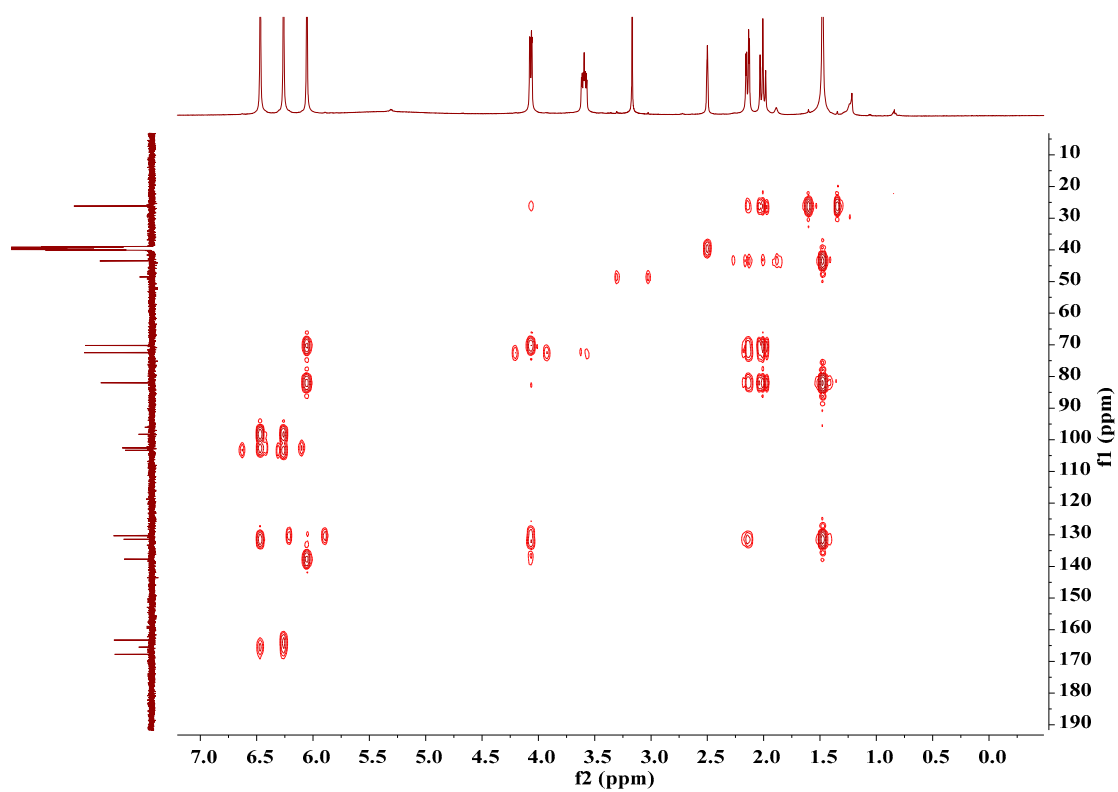

Figure S47. HMBC spectrum of (8*R*,9*R*,10*aS*)-5-hydroxyaltenuene (**14**)

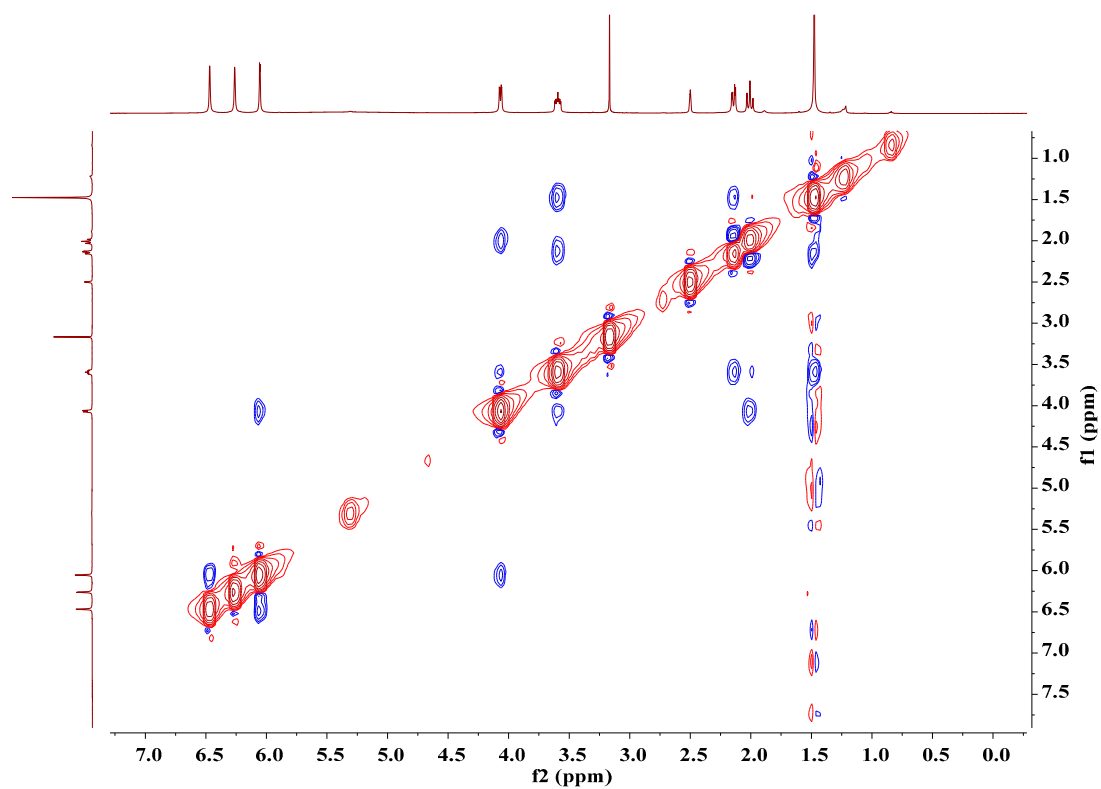

Figure S48. NOESY spectrum of (8*R*,9*R*,10*aS*)-5-hydroxyaltenuene (**14**)

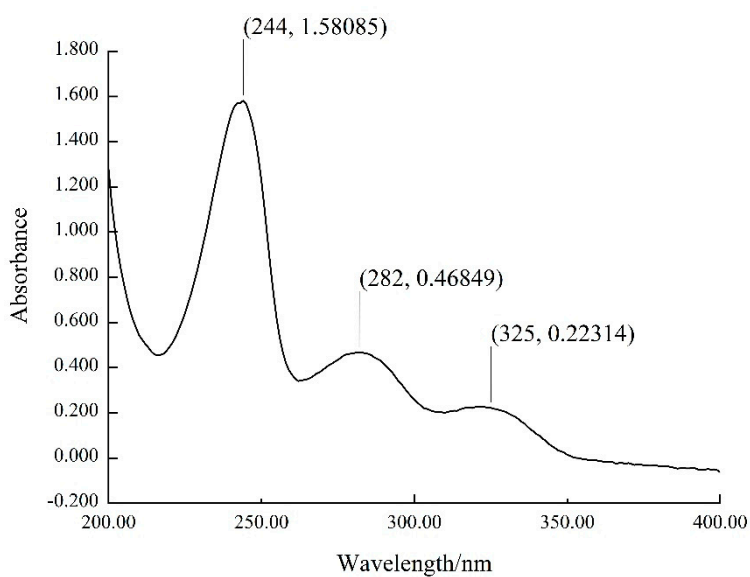

Figure S49. UV spectrum of (8R,9R,10aS)-5-hydroxyaltenuene (**14**)

202401024-CS258-G68A\_240124115645 #30 RT: 0.31 AV: 1 NL: 5.30E5  
T: FTMS + p ESI Full ms [200.00-1000.00]

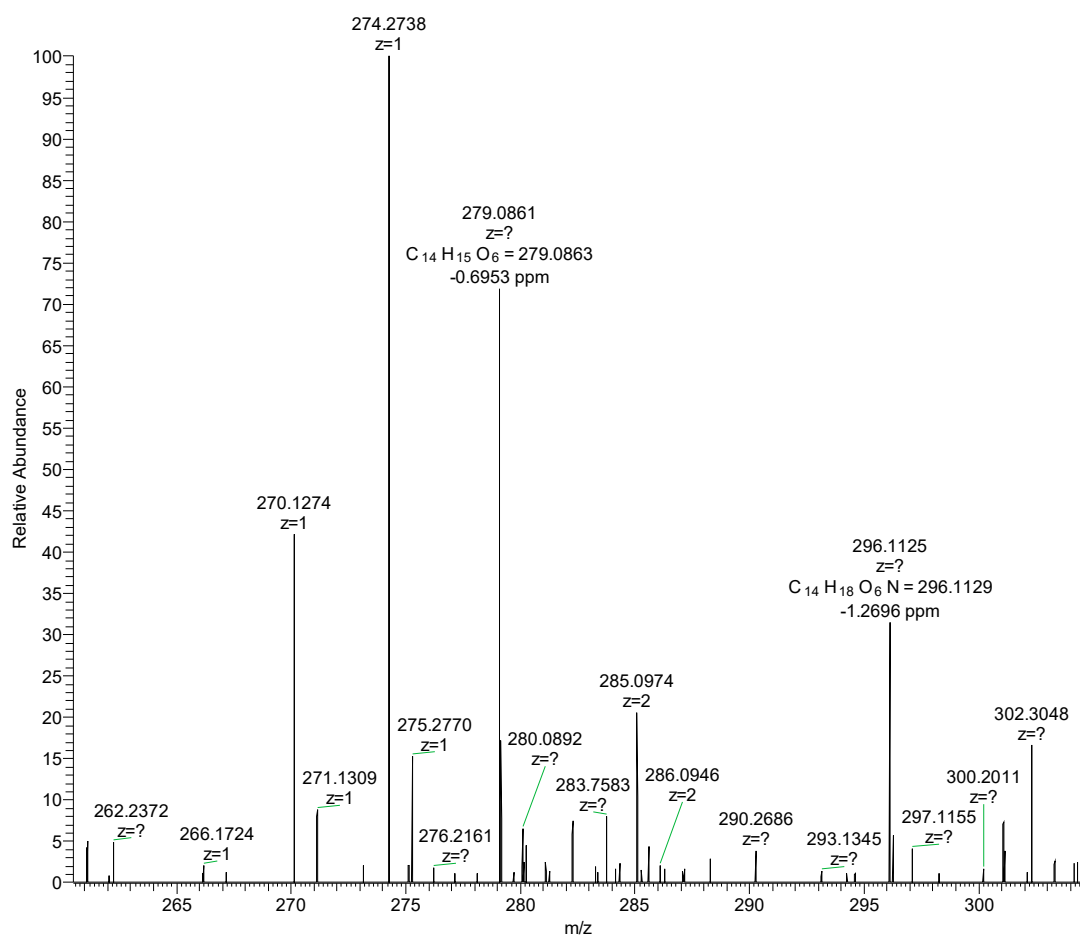

Figure S50. HRESIMS spectrum of (8R,9S,10aR)-5-hydroxyaltenuene (**15**)

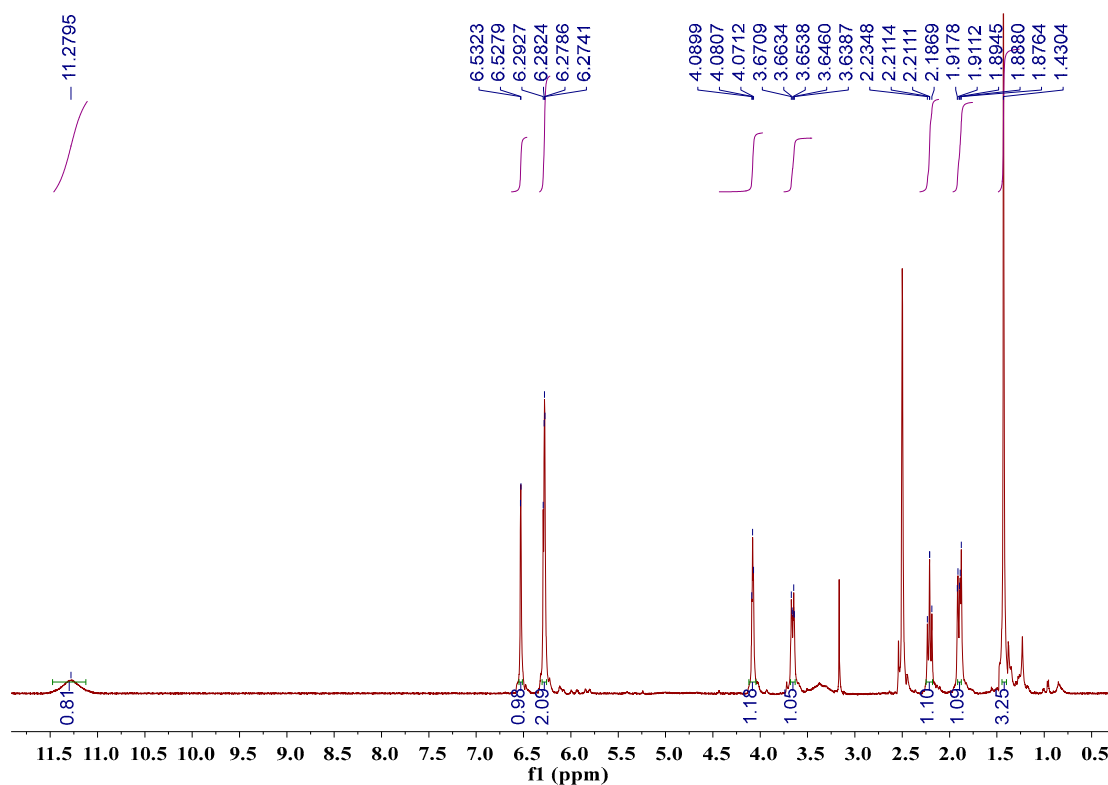

Figure S51.  $^1\text{H}$  NMR spectrum (500 MHz, DMSO) of (8*R*,9*S*,10*aR*)-5-hydroxyaltenuene (**15**)

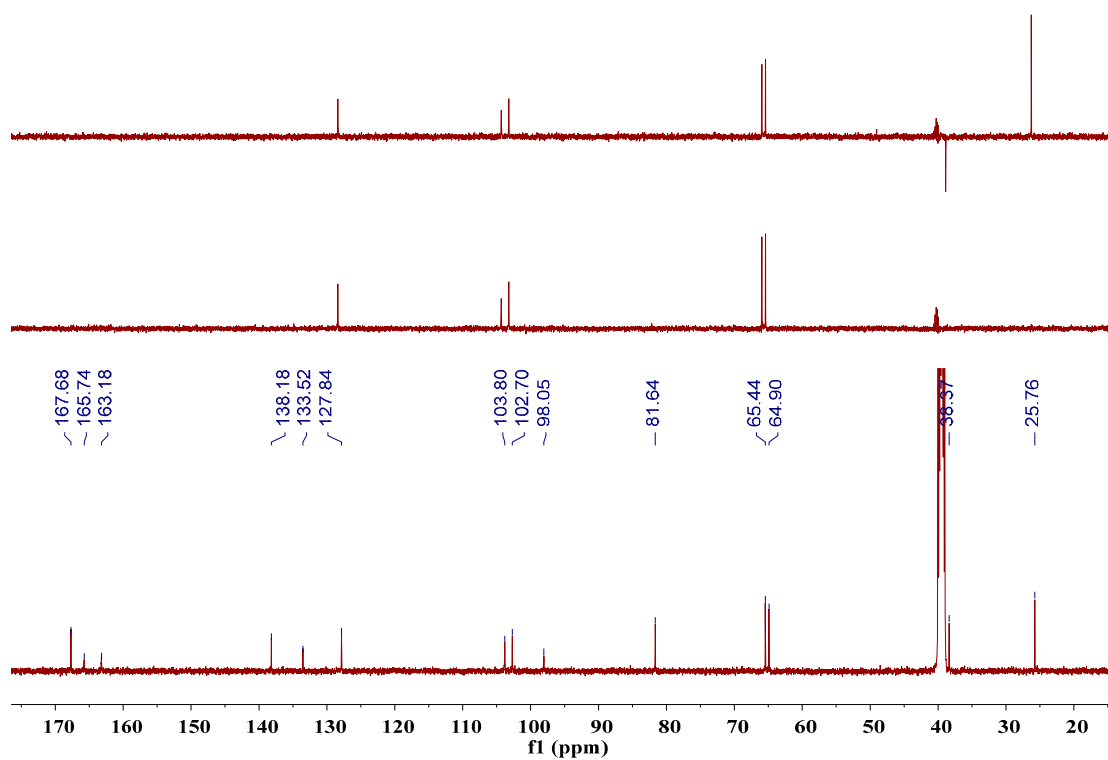

Figure S52.  $^{13}\text{C}$  NMR spectrum (125 MHz, DMSO) of (8*R*,9*S*,10*aR*)-5-hydroxyaltenuene (**15**)

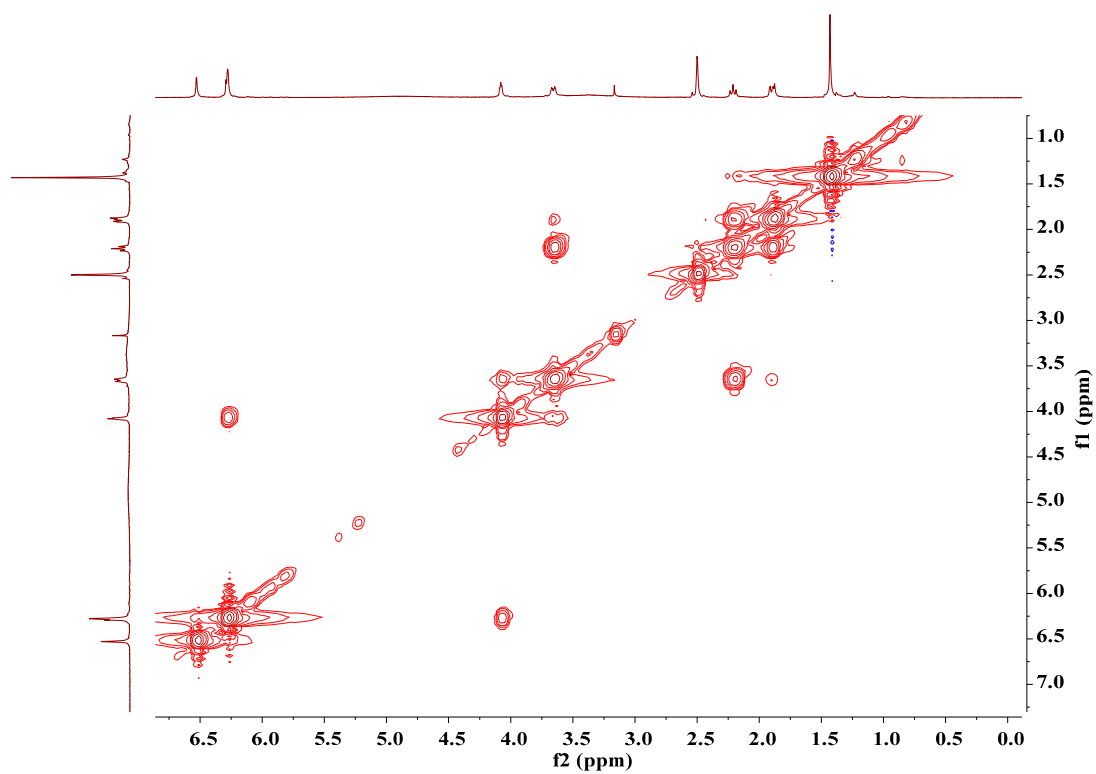

Figure S53.  $^1\text{H}$ - $^1\text{H}$  COSY spectrum of (8*R*,9*S*,10*aR*)-5-hydroxyaltenuene (**15**)

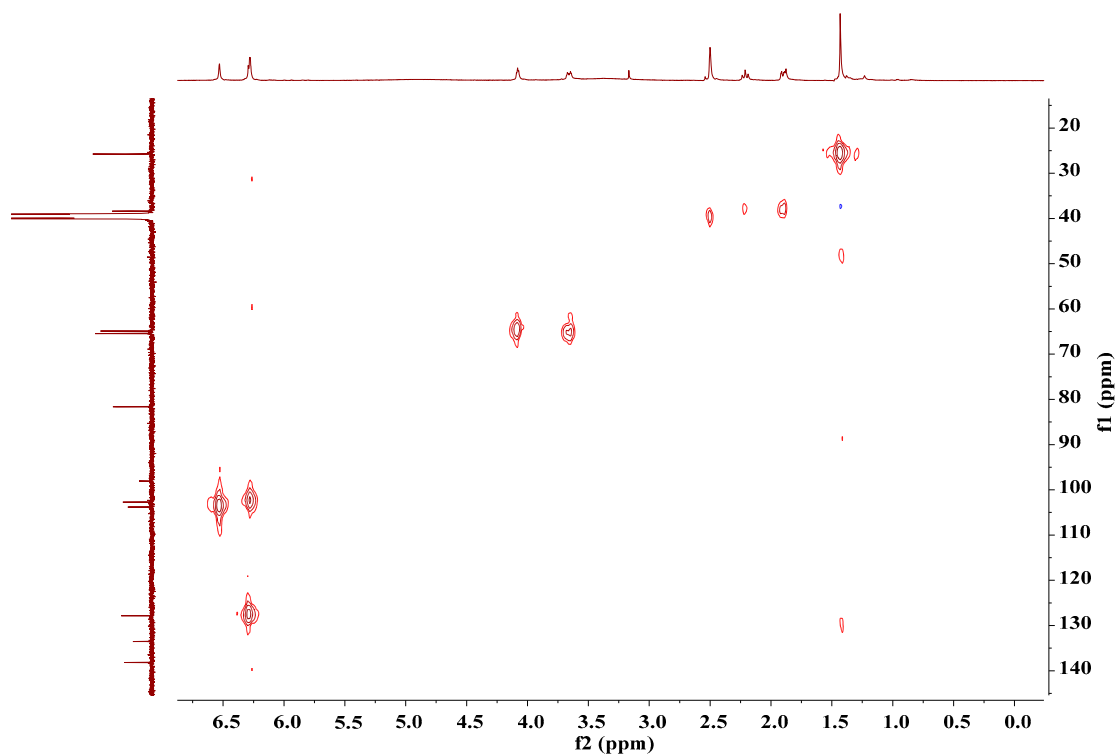

Figure S54. HSQC spectrum of (8*R*,9*S*,10*aR*)-5-hydroxyaltenuene (**15**)

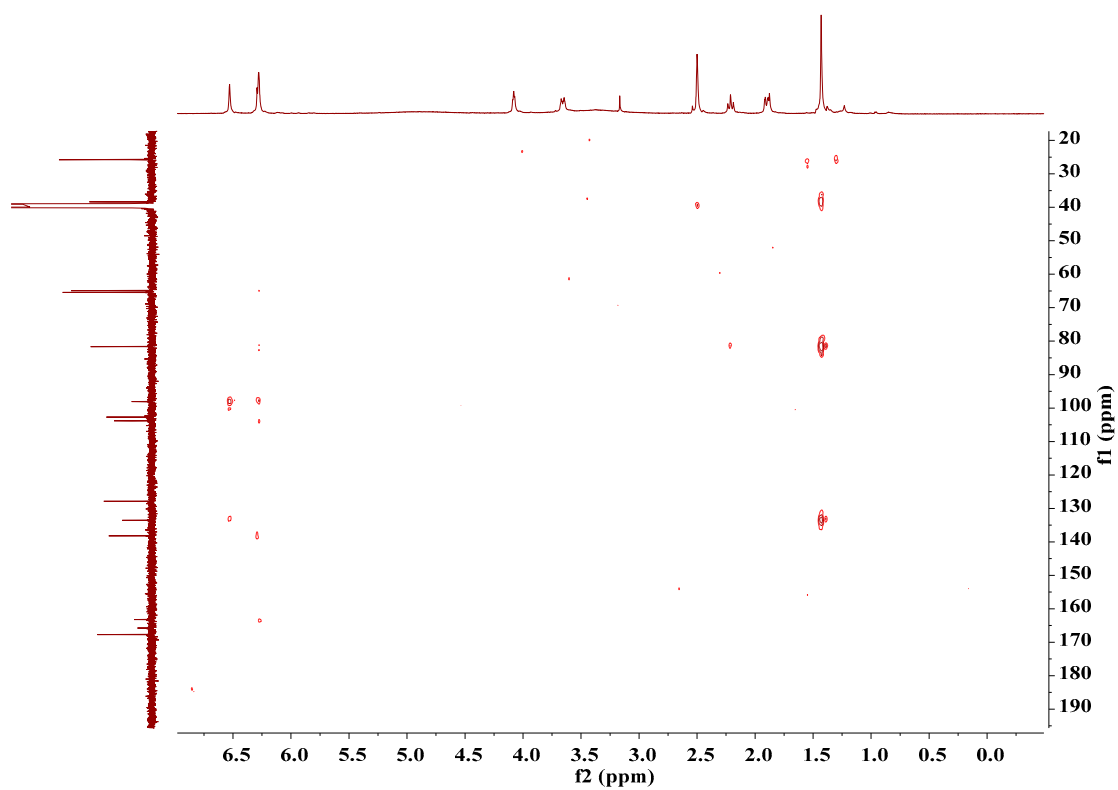

Figure S55. HMBC spectrum of (8*R*,9*S*,10*aR*)-5-hydroxyaltenuene (**15**)

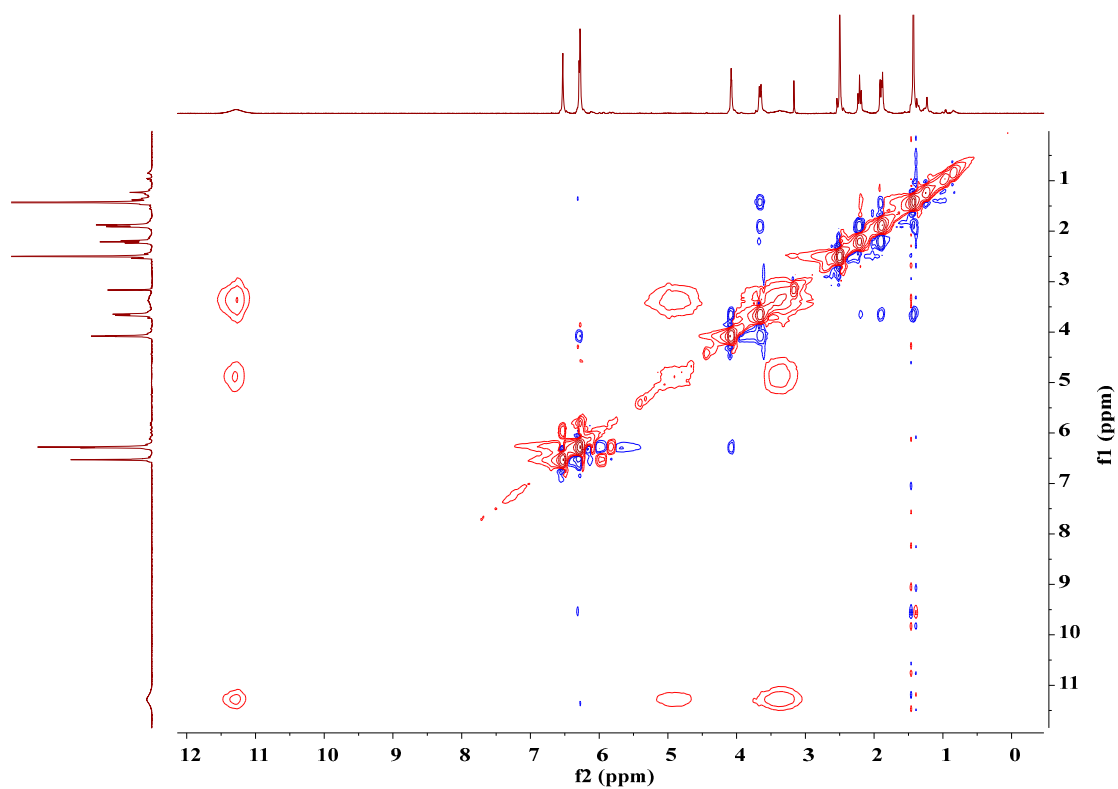

Figure S56. NOESY spectrum of (8*R*,9*S*,10*aR*)-5-hydroxyaltenuene (**15**)

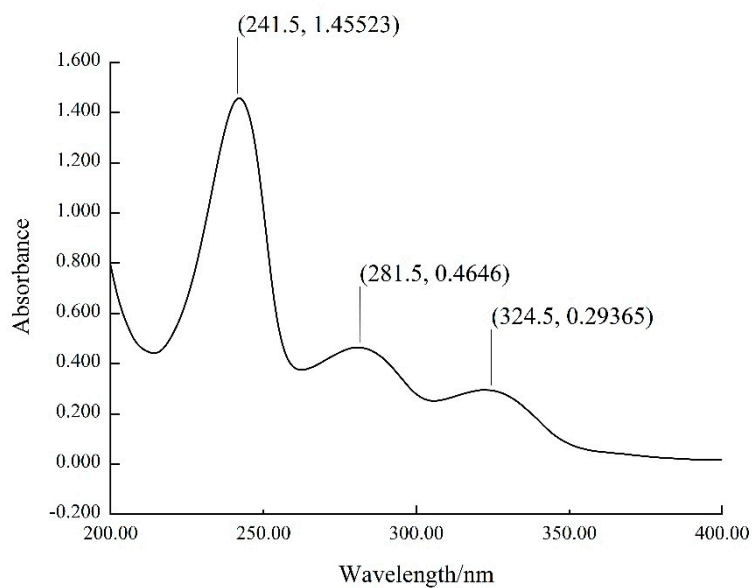

Figure S57. UV spectrum of (8R,9S,10aR)-5-hydroxyaltenuene (**15**)

20230927-CS258-G106\_230928154042 #32-33 RT: 0.45-0.47 AV: 2 NL: 7.96E6  
T: FTMS + p ESI Full ms [180.00-2000.00]

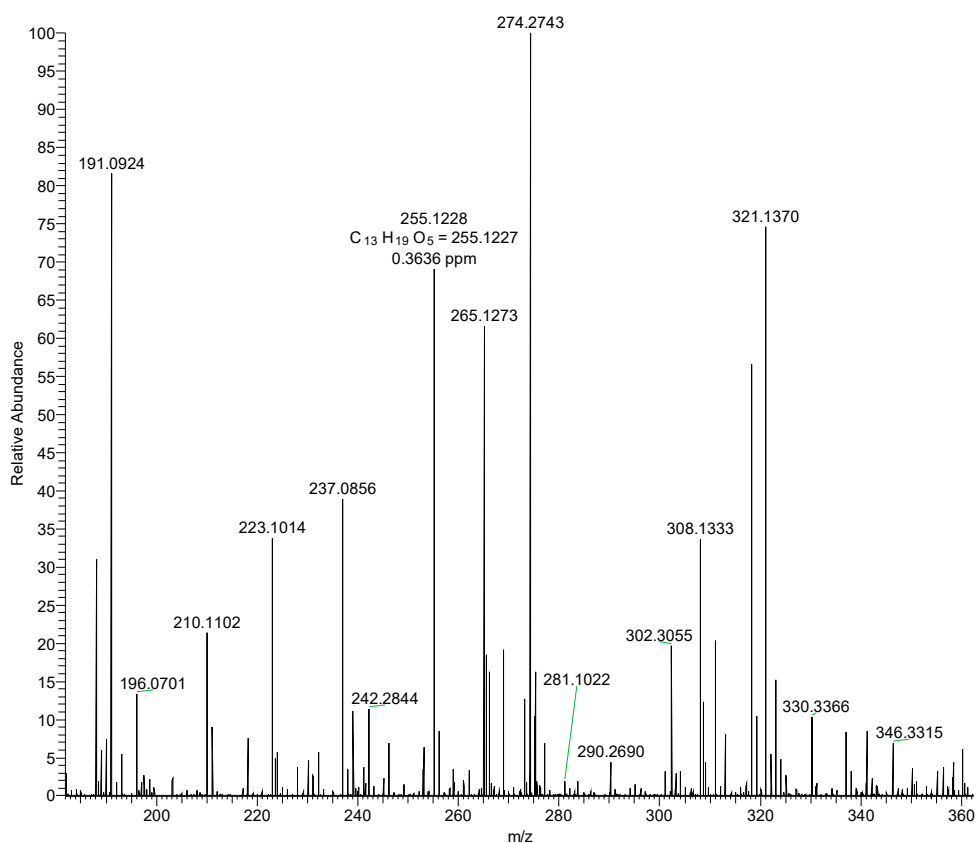

Figure S58. HRESIMS spectrum of nemanecin D (**25**)



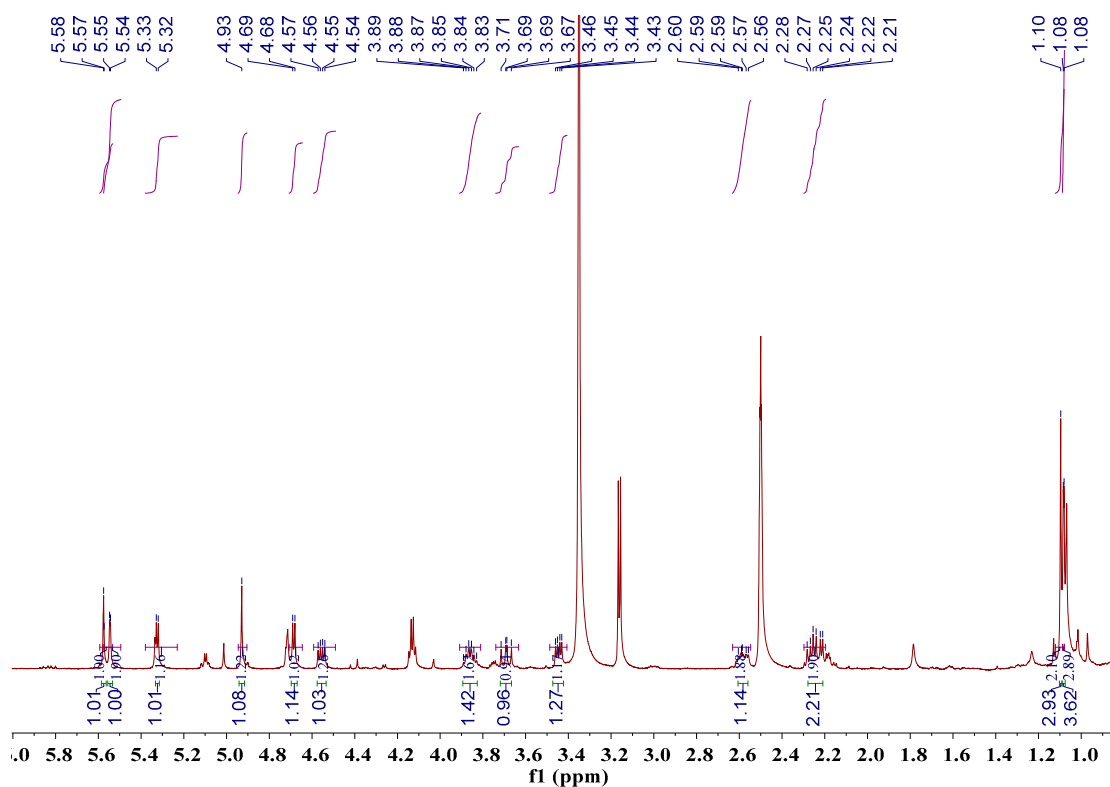

Figure S59. <sup>1</sup>H NMR spectrum (500 MHz, DMSO) of nemanecin D (**25**)

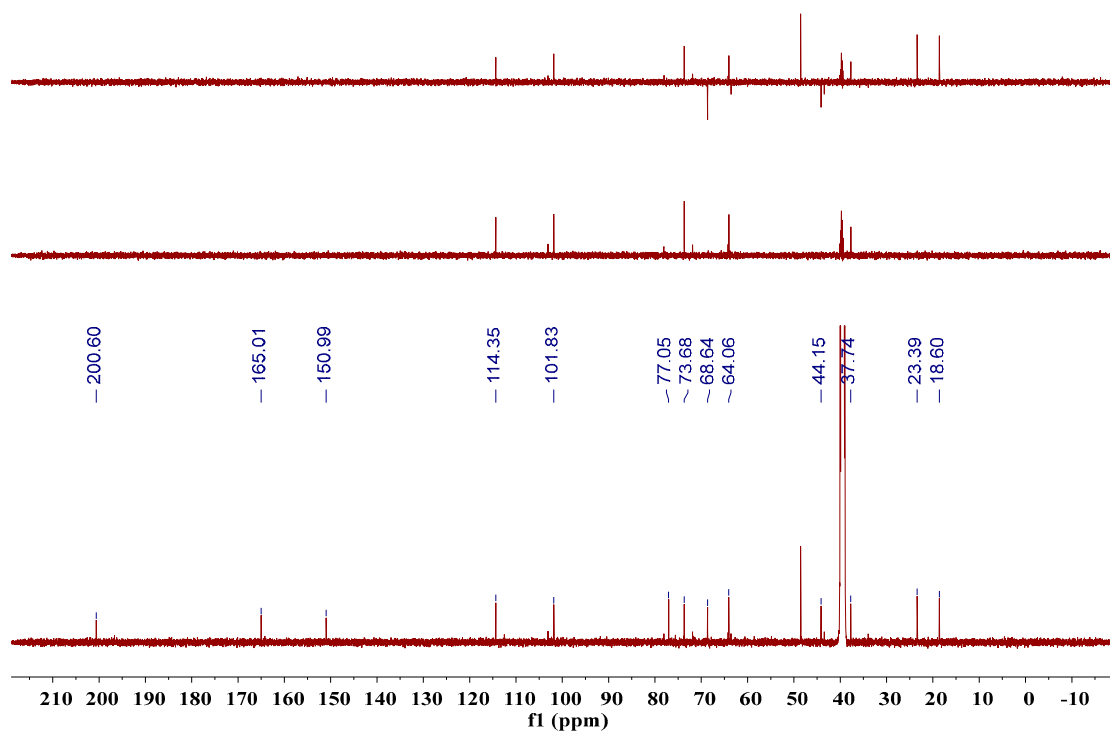

Figure S60. <sup>13</sup>C NMR spectrum (125 MHz, DMSO) of nemanecin D (**25**)

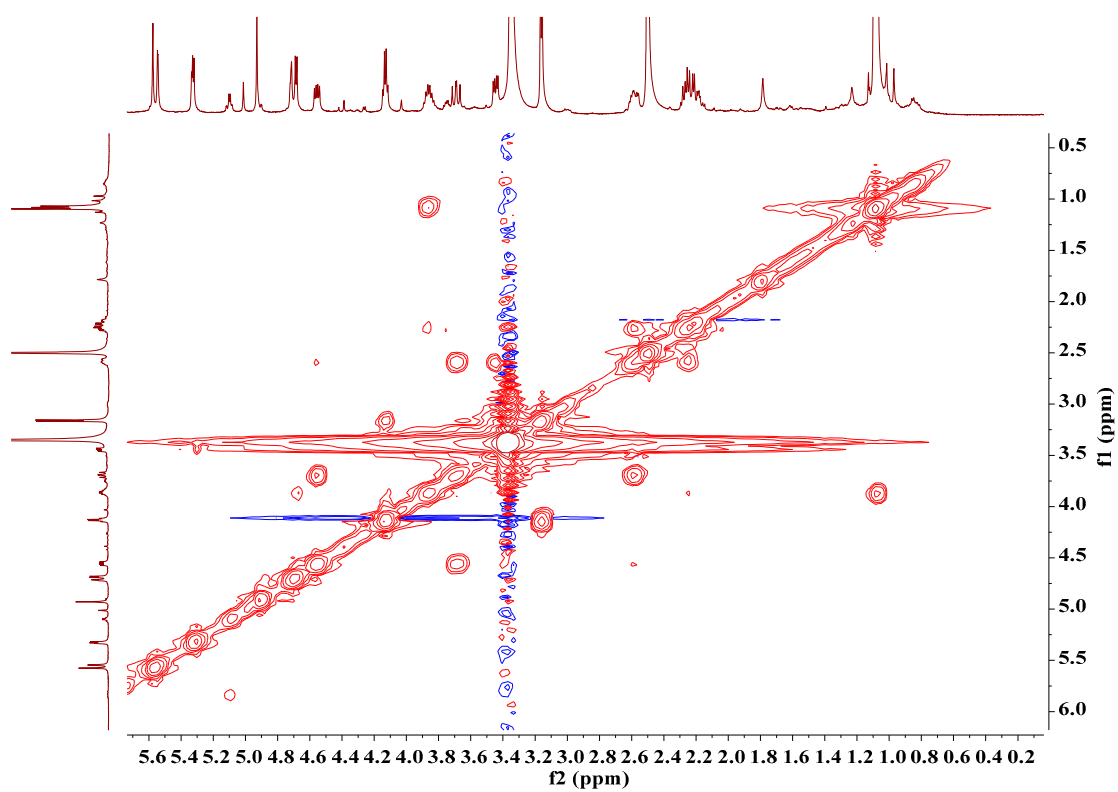

Figure S61.  $^1\text{H}$ - $^1\text{H}$  COSY spectrum of nemanecin D (**25**)

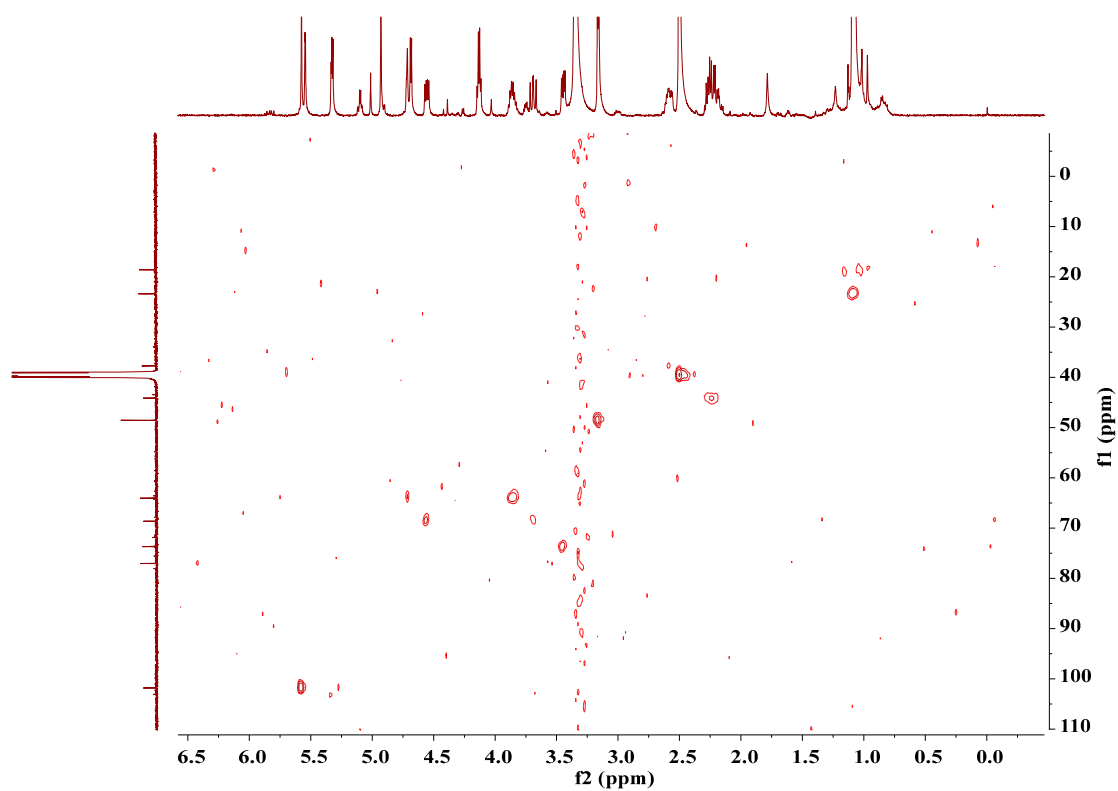

Figure S62. HSQC spectrum of nemanecin D (**25**)

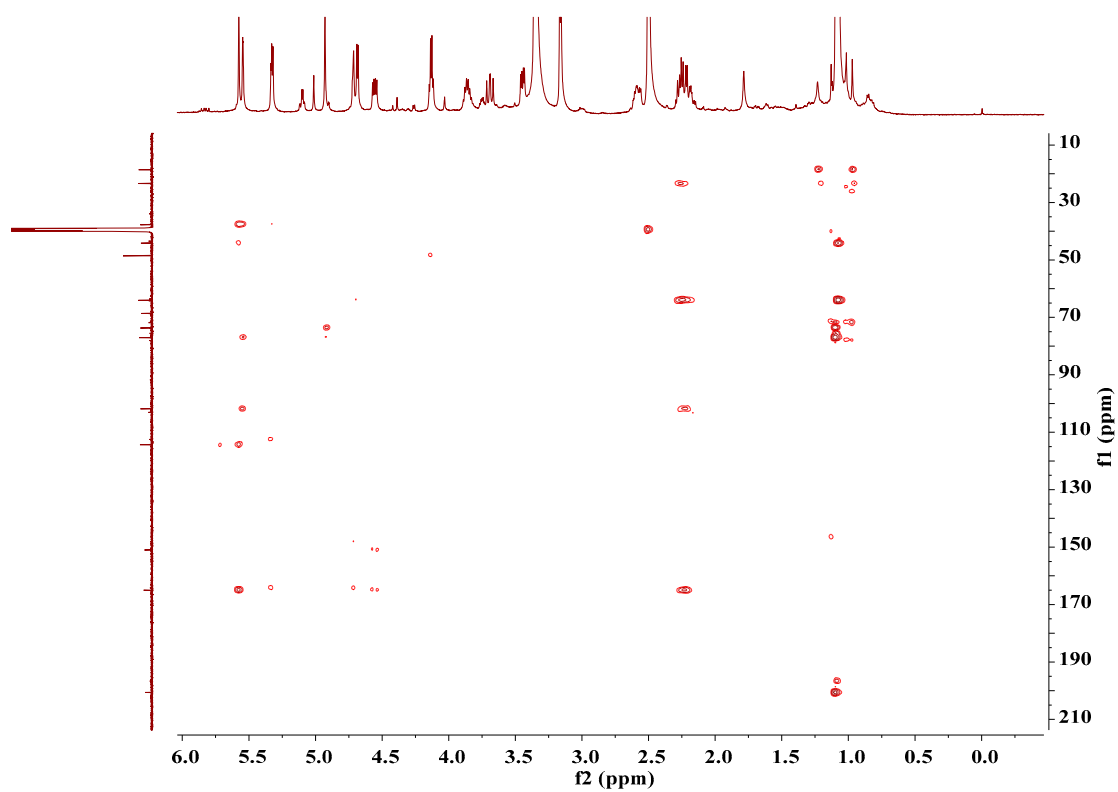

Figure S63. HMBC spectrum of nemanecin D (**25**)

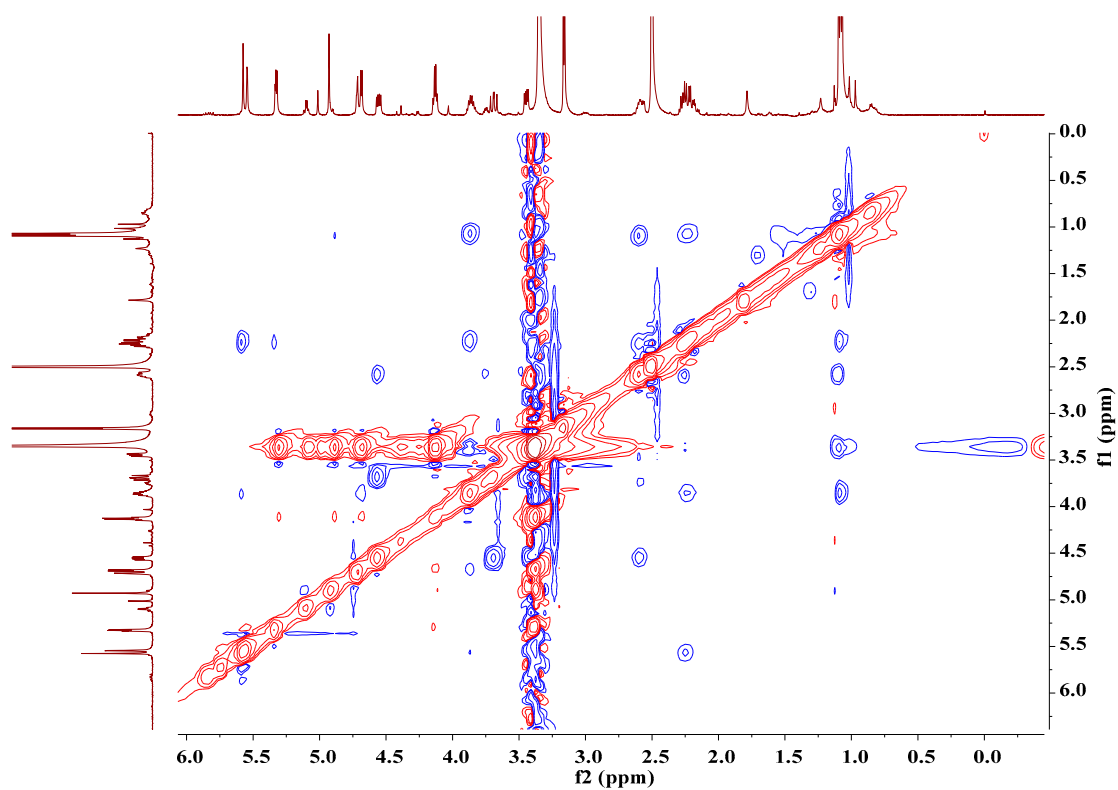

Figure S64. NOESY spectrum of nemanecin D (**25**)

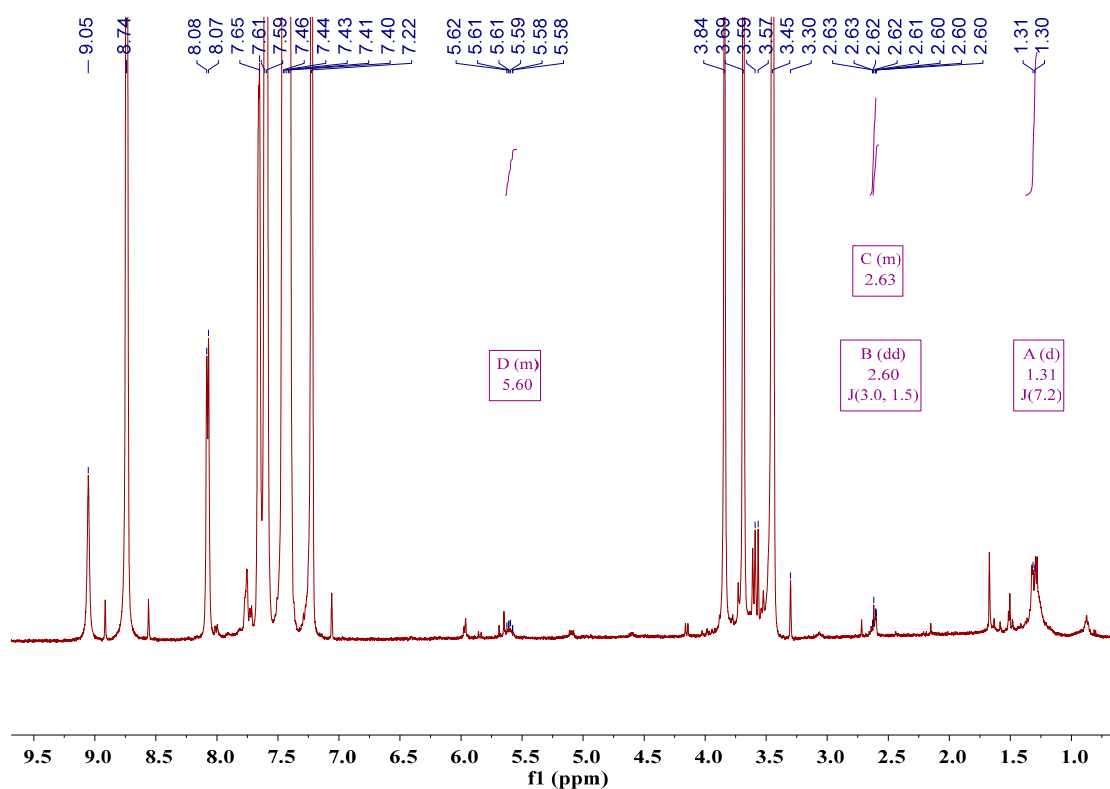

Figure S65. <sup>1</sup>H NMR spectrum of (*S*)-MTPA ester (**25a**)

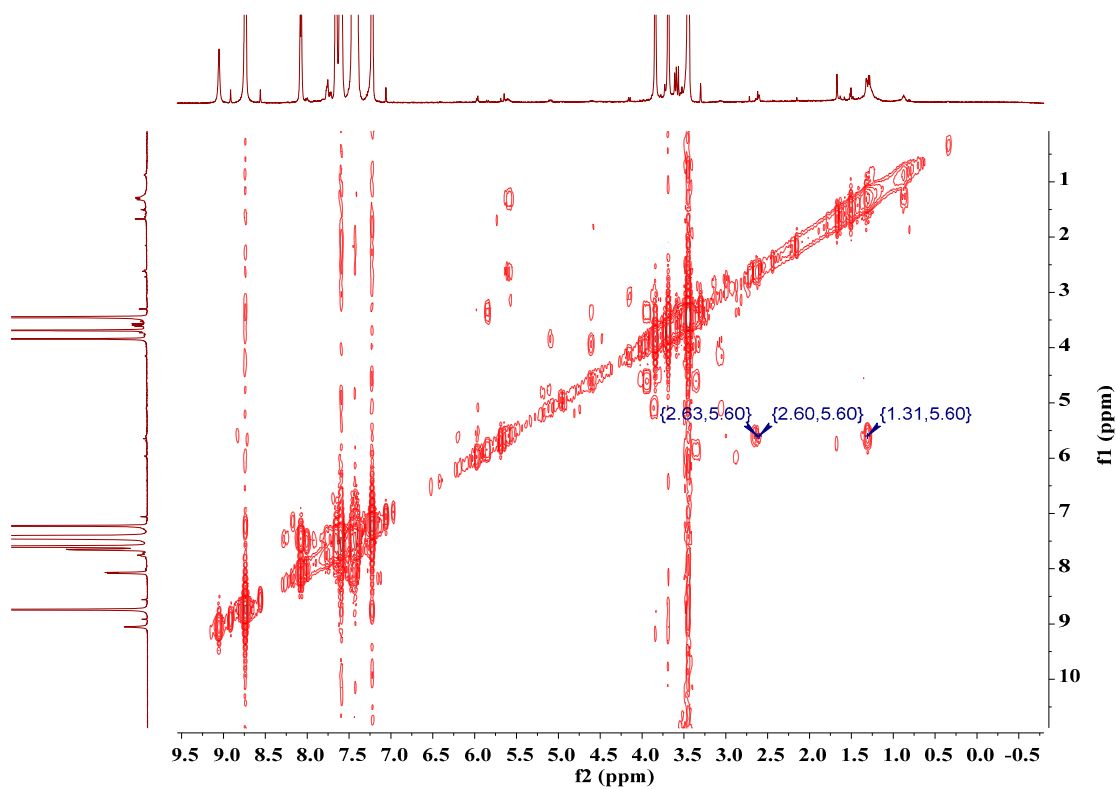

Figure S66. <sup>1</sup>H-<sup>1</sup>H COSY spectrum of (*S*)-MTPA ester (**25a**)

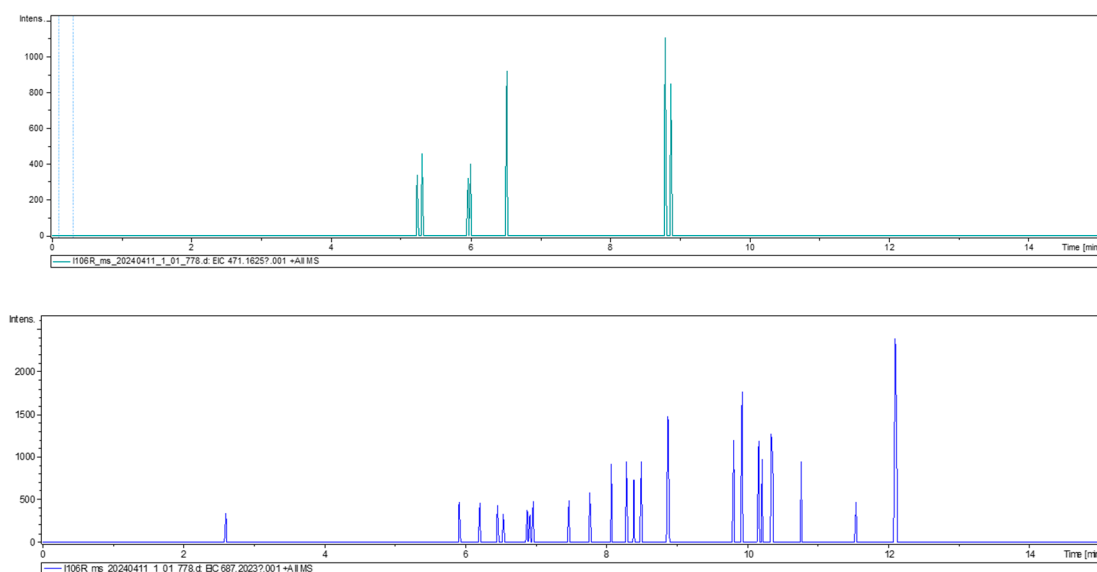

Failed to find the MS peak due to instability

Figure S67. HRMS spectrum of (*S*)-MTPA ester (**25a**)

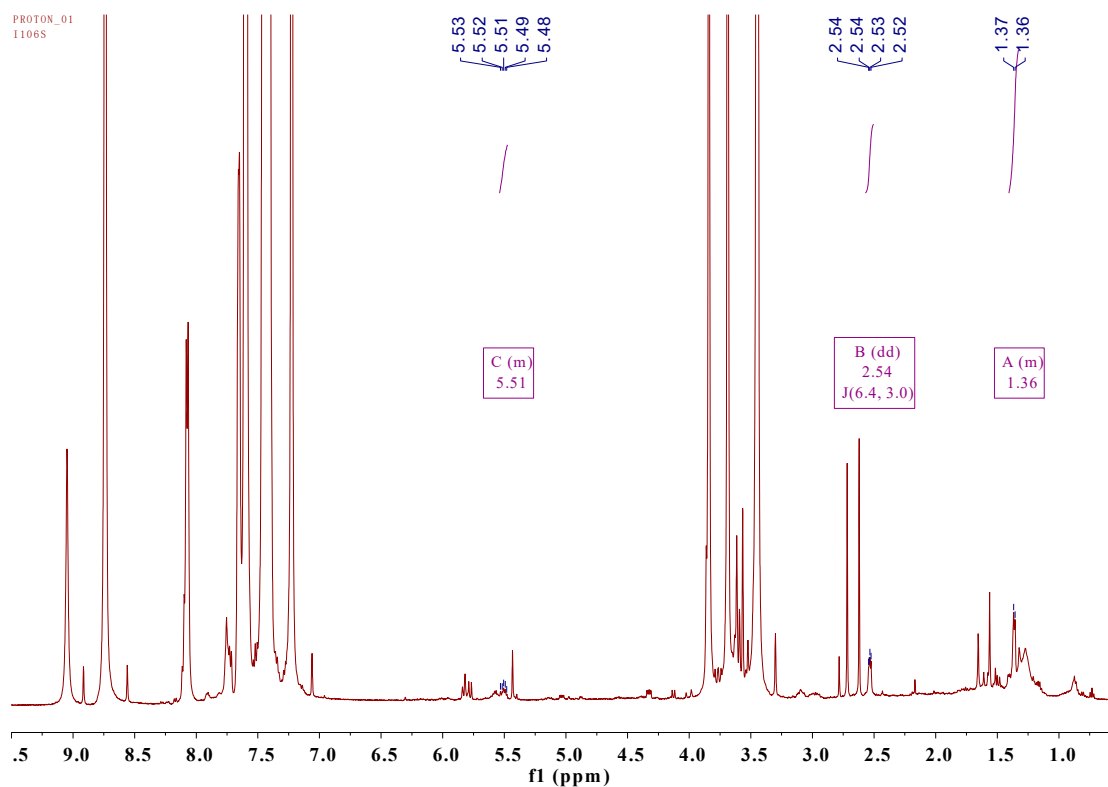

Figure S68.  $^1\text{H}$  NMR spectrum of (*R*)-MTPA ester (**25b**)

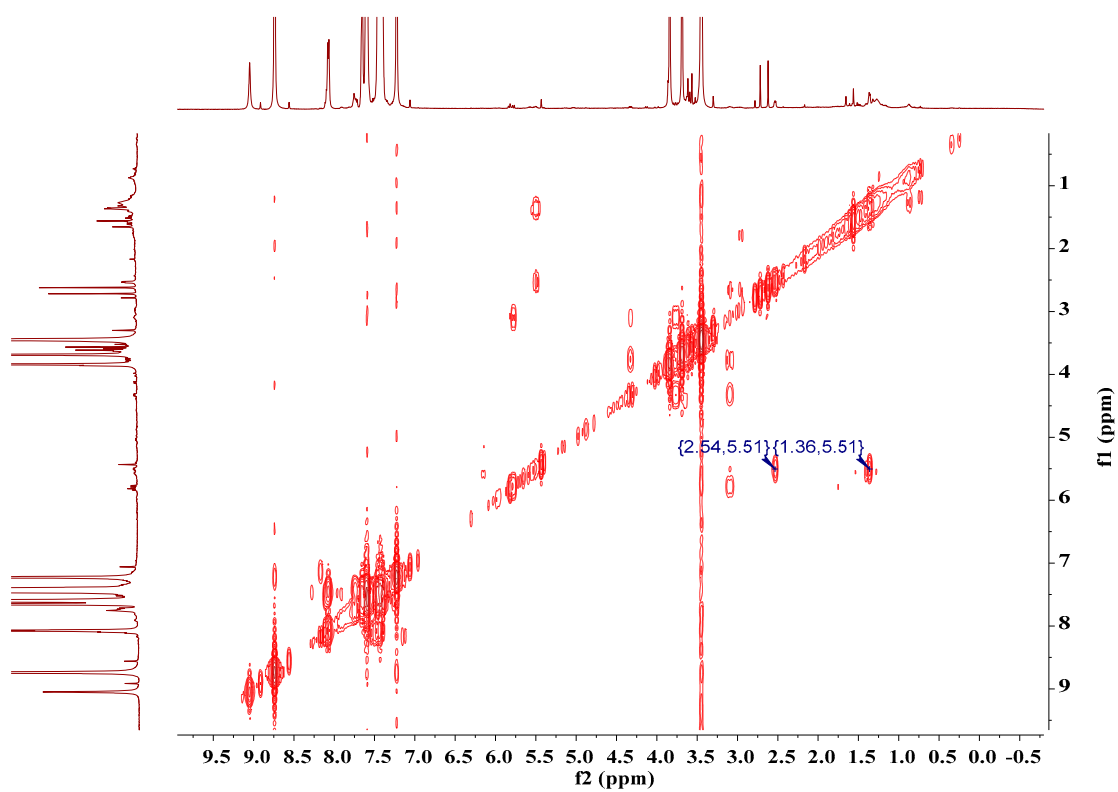

Figure S69.  $^1\text{H}$ - $^1\text{H}$  COSY spectrum of (*R*)-MTPA ester (**25b**)

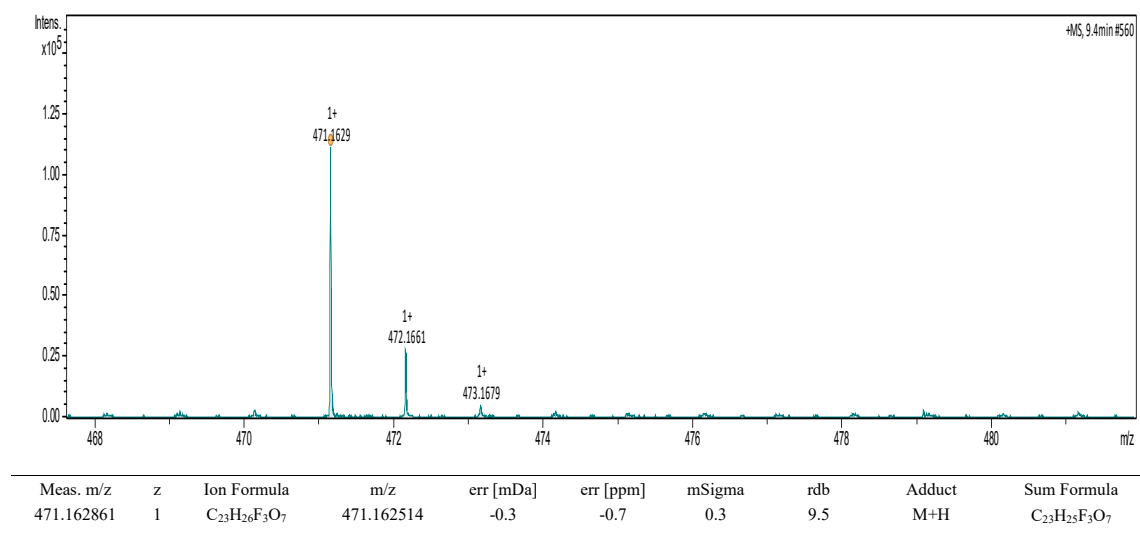

Figure S70. HRMS spectrum of (*R*)-MTPA ester (**25b**)

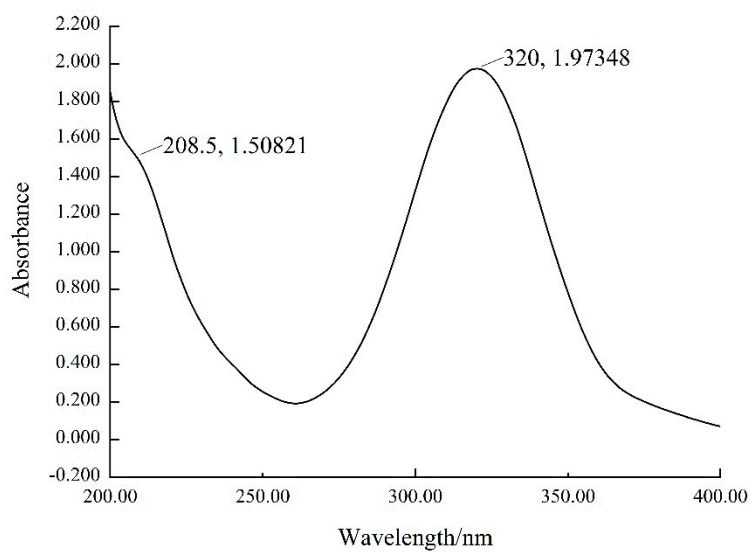

Figure S71. UV spectrum of nemanecin D (25)

202401024-CS258-G105\_240124115645 #46-47 RT: 0.44-0.45 AV: 2 NL: 9.41E6  
T: FTMS + p ESI Full ms [200.00-1000.00]

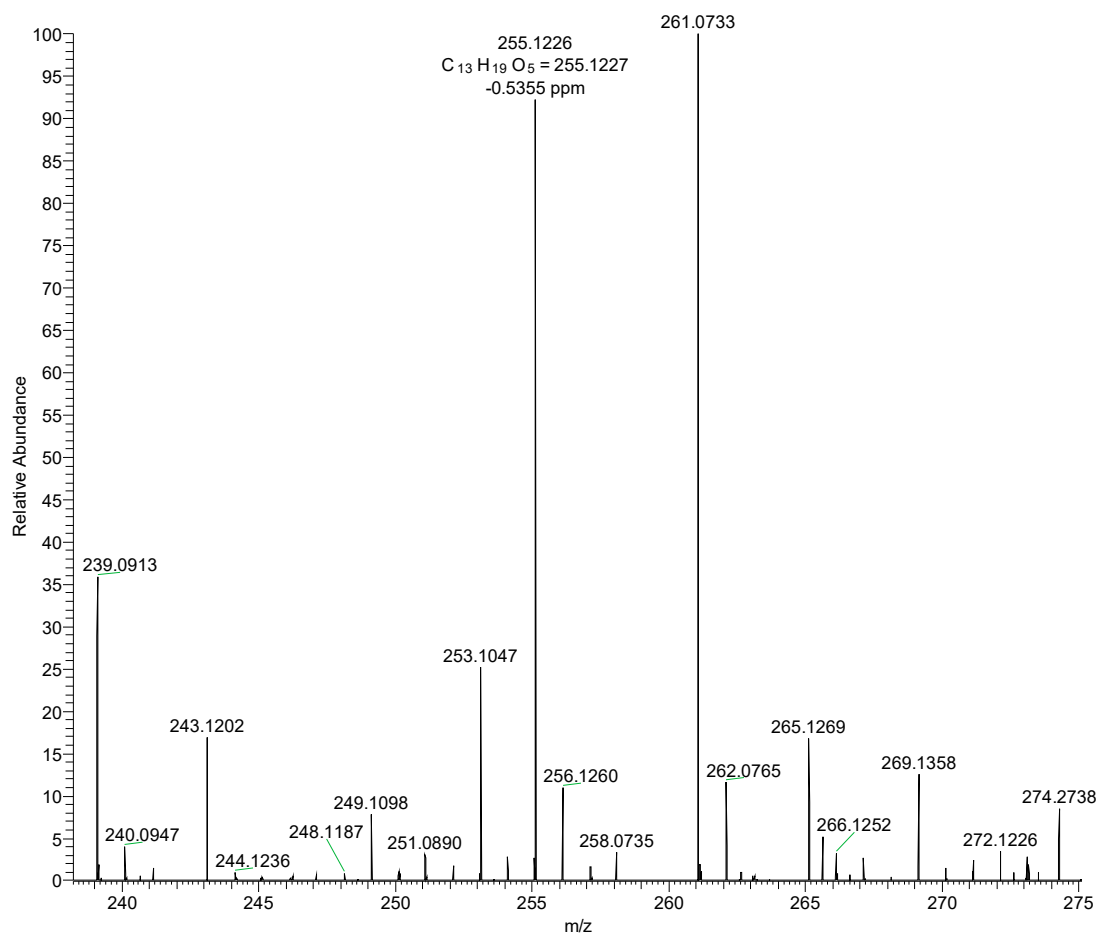

Figure S72. HRESIMS spectrum of nemanecin E (26)

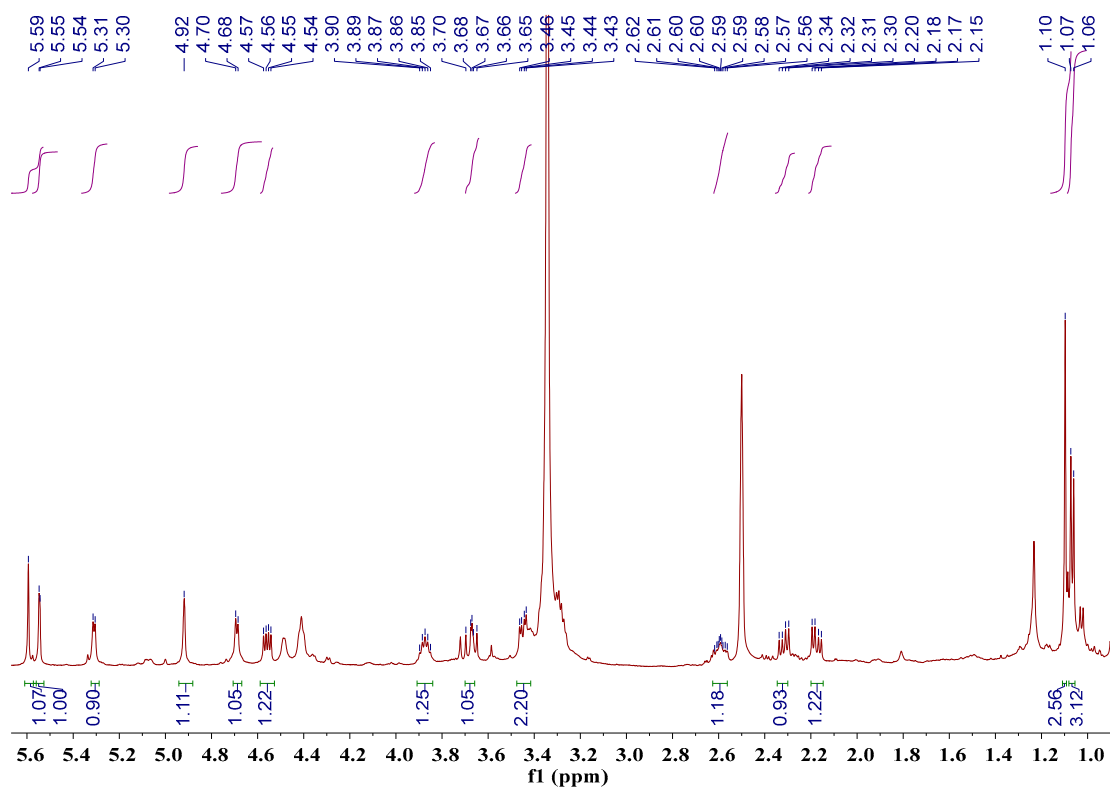

Figure S73. <sup>1</sup>H NMR spectrum (500 MHz, DMSO) of nemanecin E (**26**)

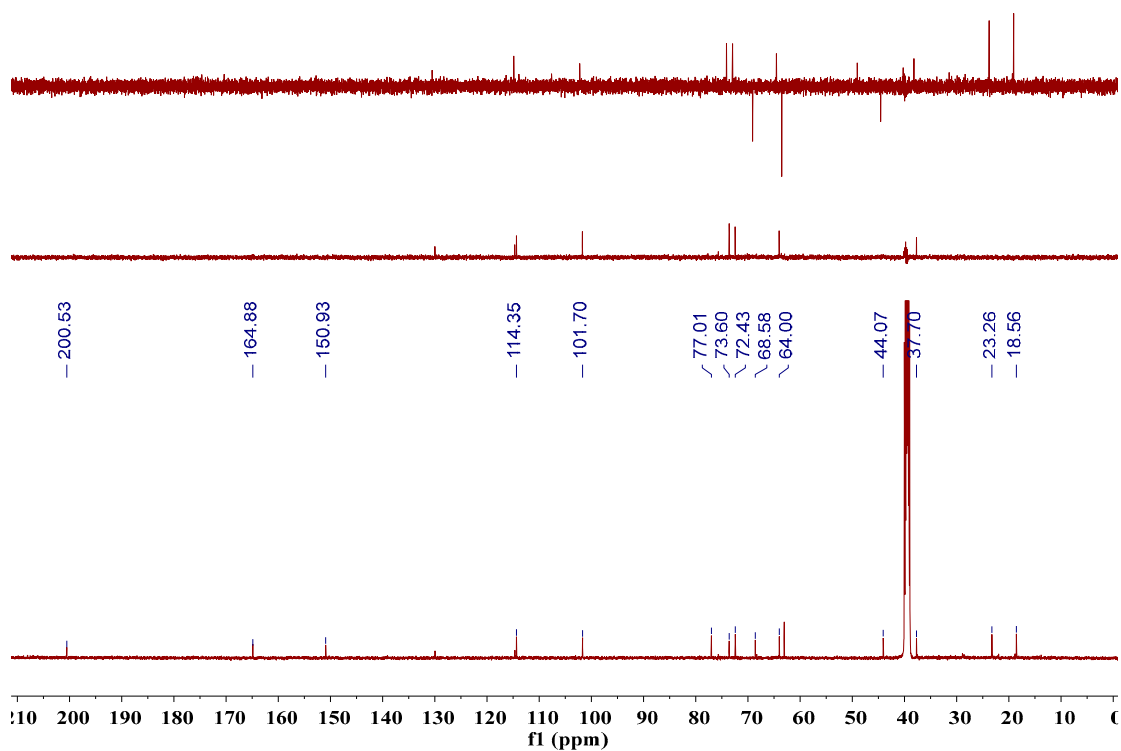

Figure S74. <sup>13</sup>C NMR spectrum (125 MHz, DMSO) of nemanecin E (**26**)



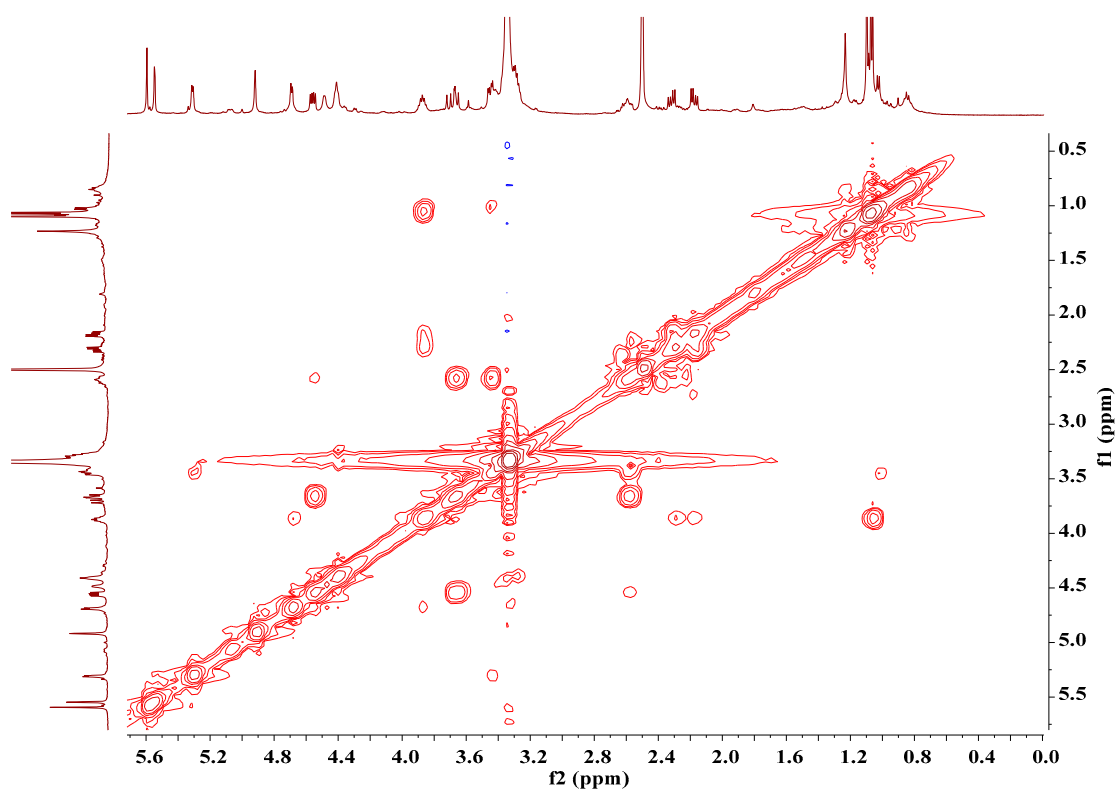

Figure S75.  $^1\text{H}$ - $^1\text{H}$  COSY spectrum of nemanecin E (**26**)

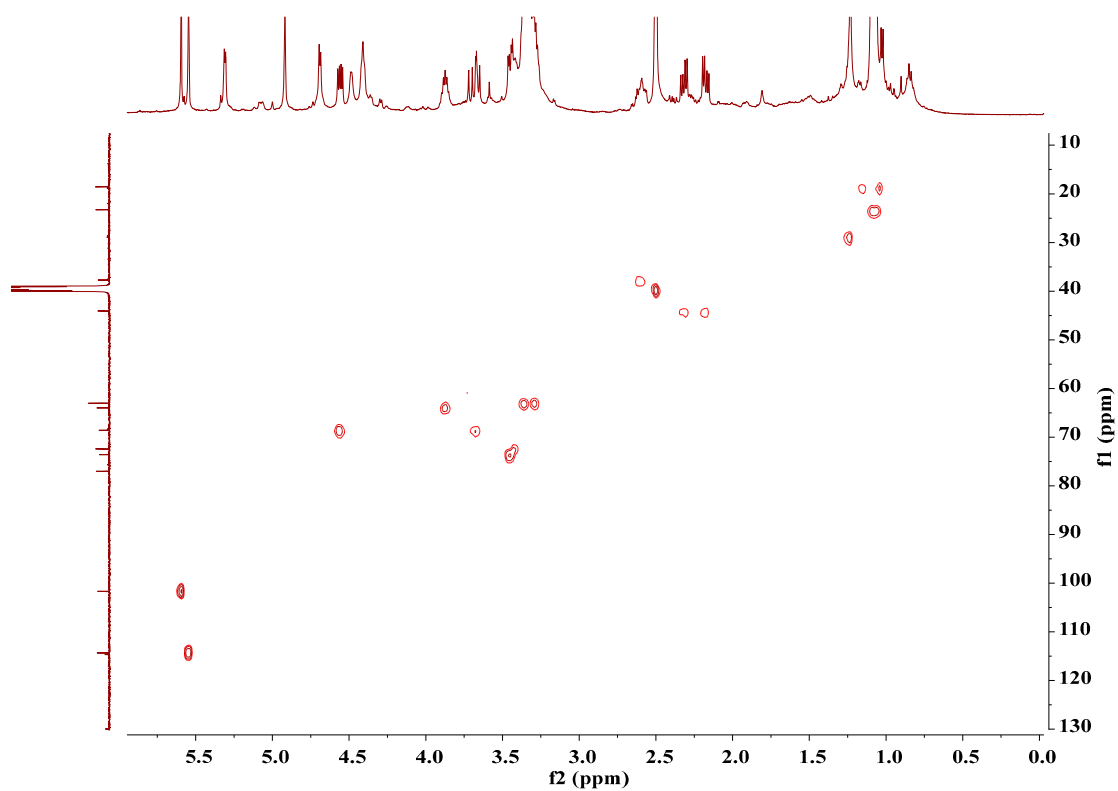

Figure S76. HSQC spectrum of nemanecin E (**26**)

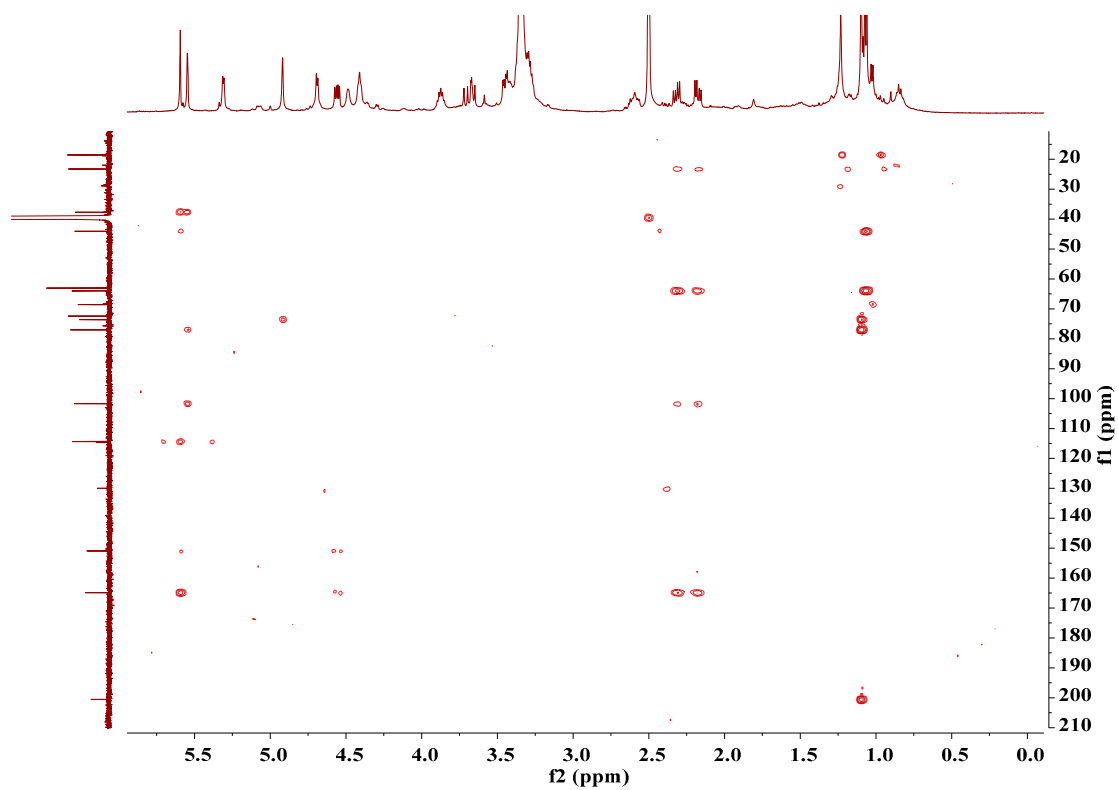

Figure S77. HMBC spectrum of nemanecin E (**26**)

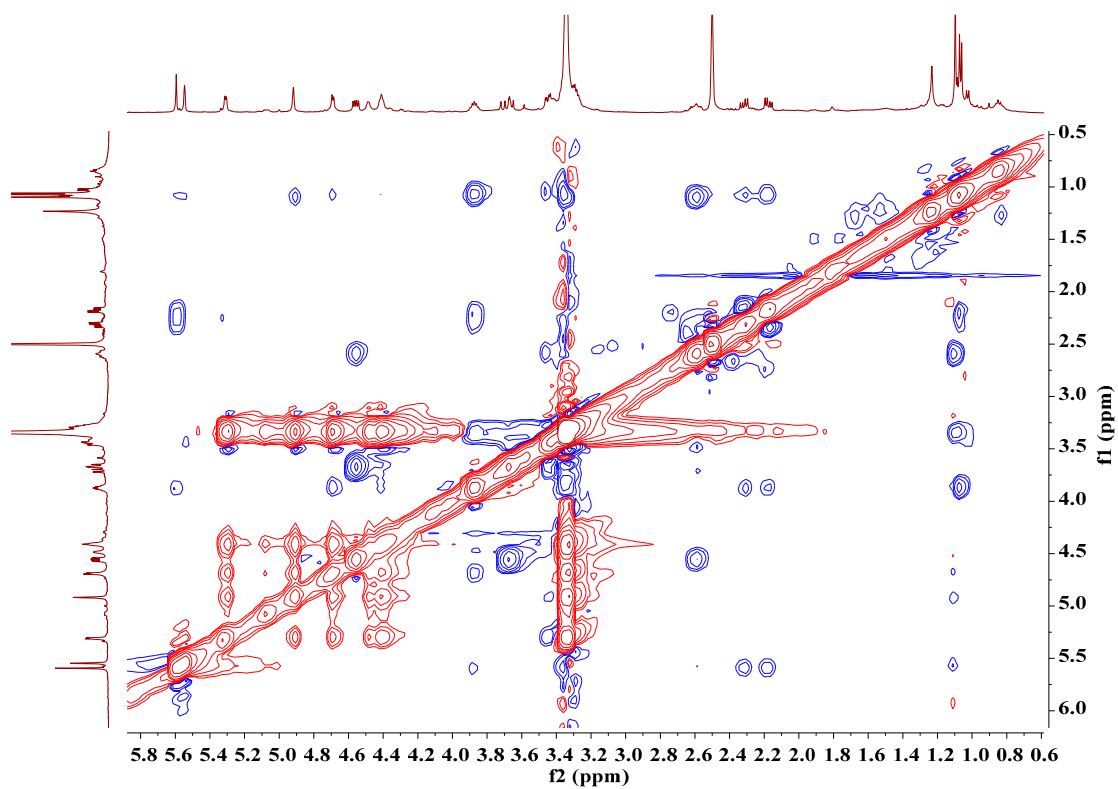

Figure S78. NOESY spectrum of nemanecin E (**26**)

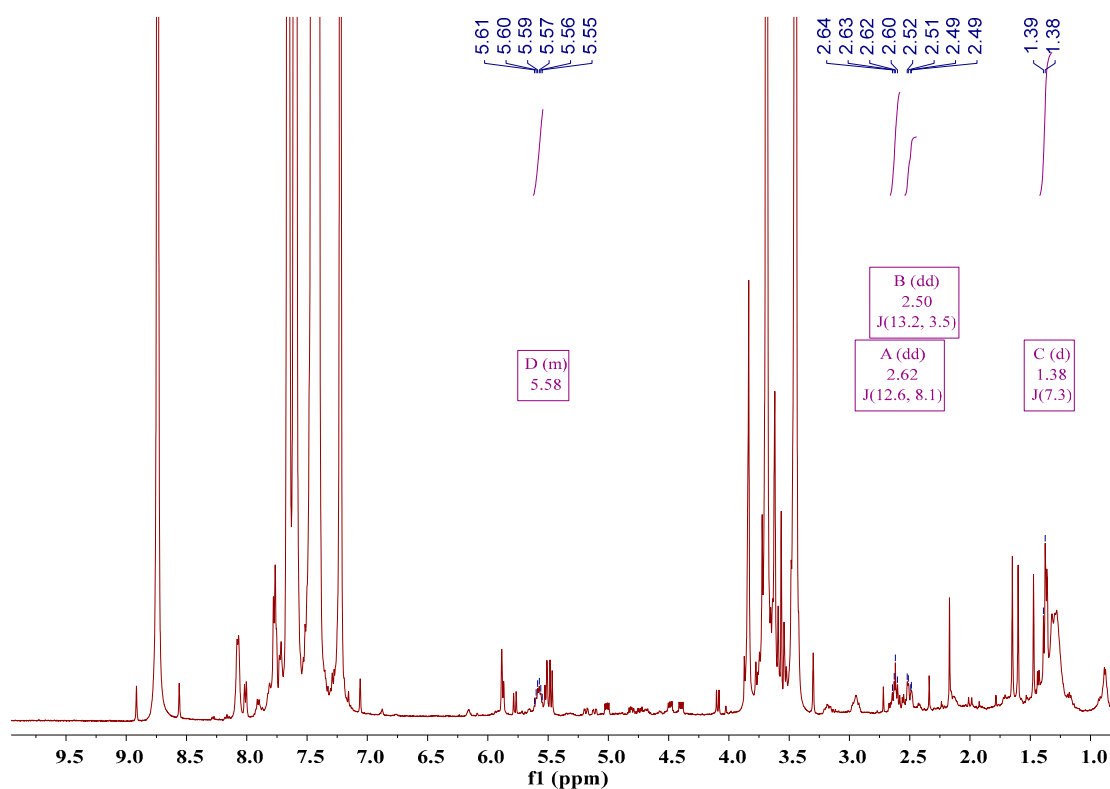

Figure S79.  $^1\text{H}$  NMR spectrum of (*S*)-MTPA Ester (**26a**)

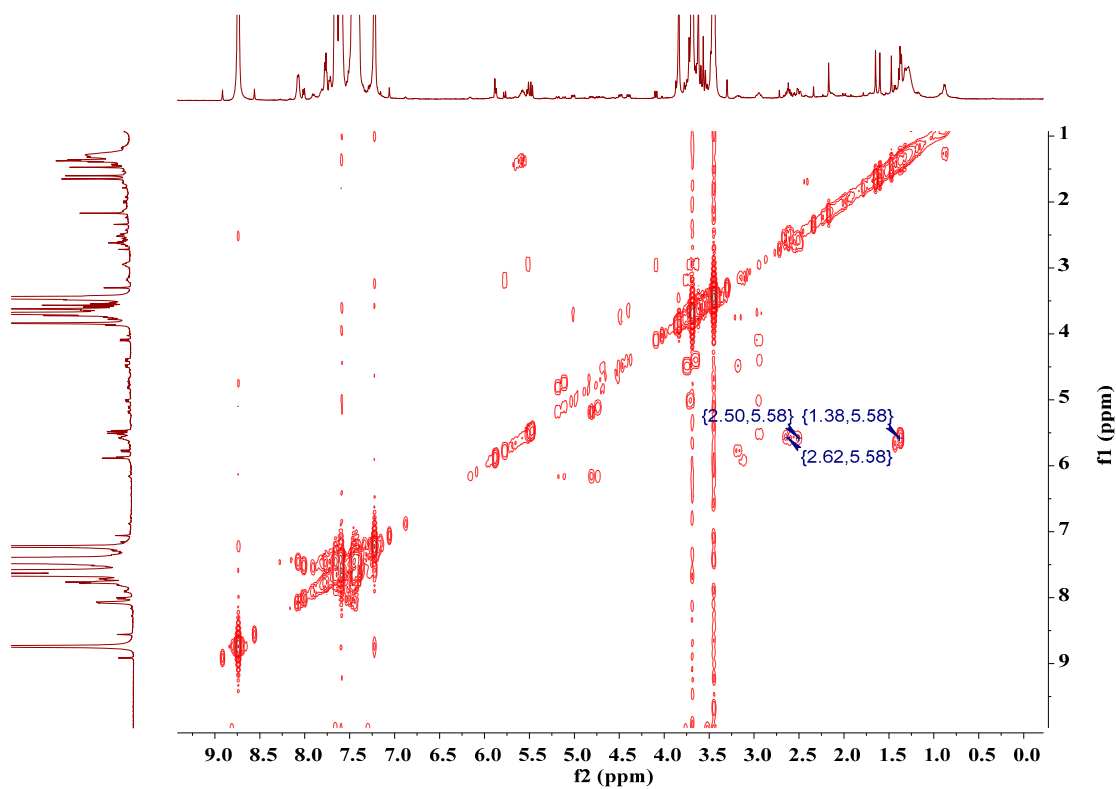

Figure S80.  $^1\text{H}$ - $^1\text{H}$  COSY spectrum of (*S*)-MTPA Ester (**26a**)

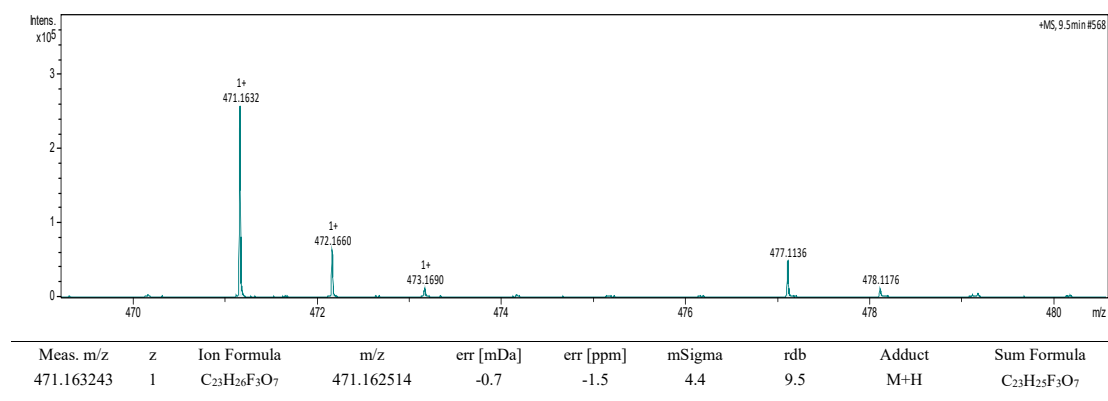

Figure S81. HRMS spectrum of (*S*)-MTPA Ester (**26a**)

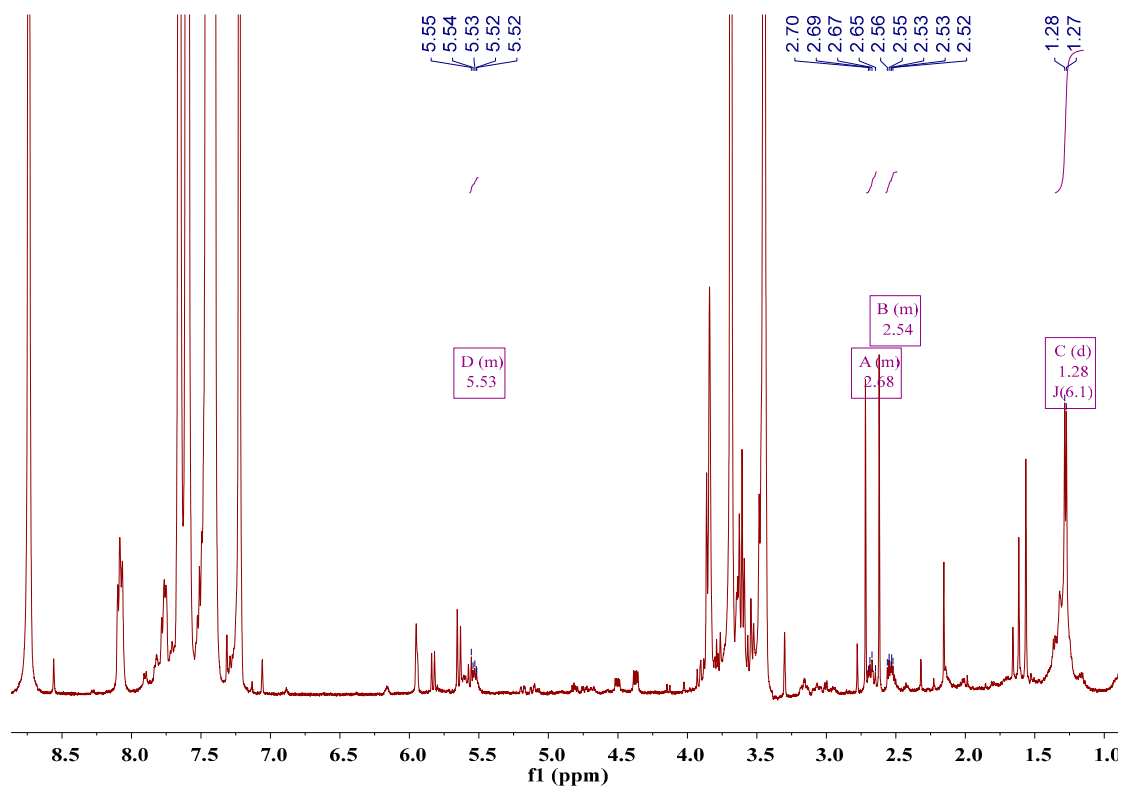

Figure S82. <sup>1</sup>H NMR spectrum of (*R*)-MTPA Ester (**26b**)

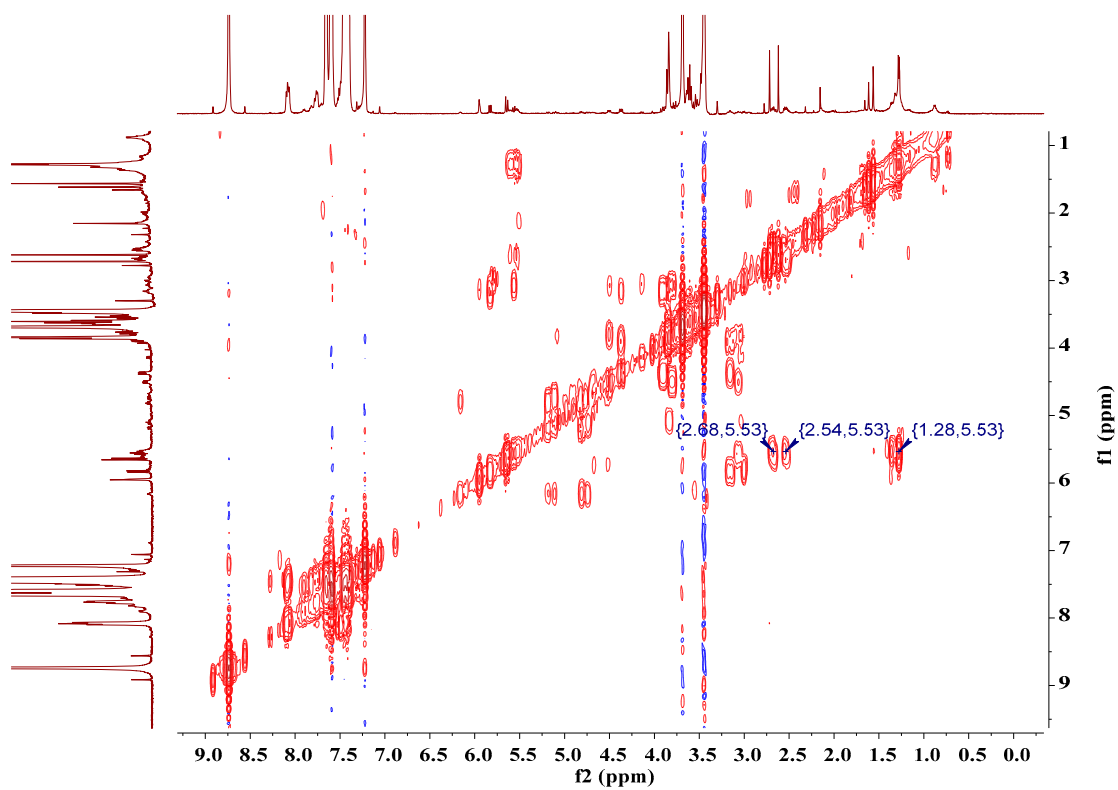

Figure S83.  $^1\text{H}$ - $^1\text{H}$  COSY spectrum of (*R*)-MTPA Ester (**26b**)

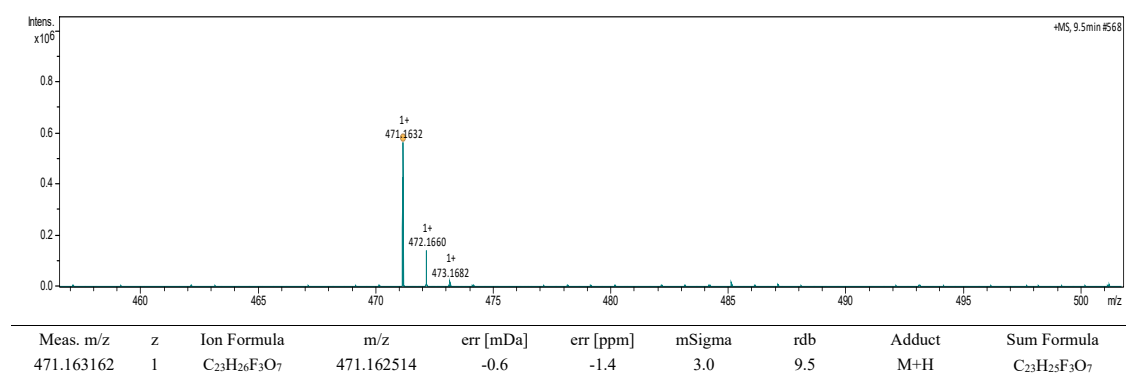

Figure S84. HRMS spectrum of (*R*)-MTPA Ester (**26b**)

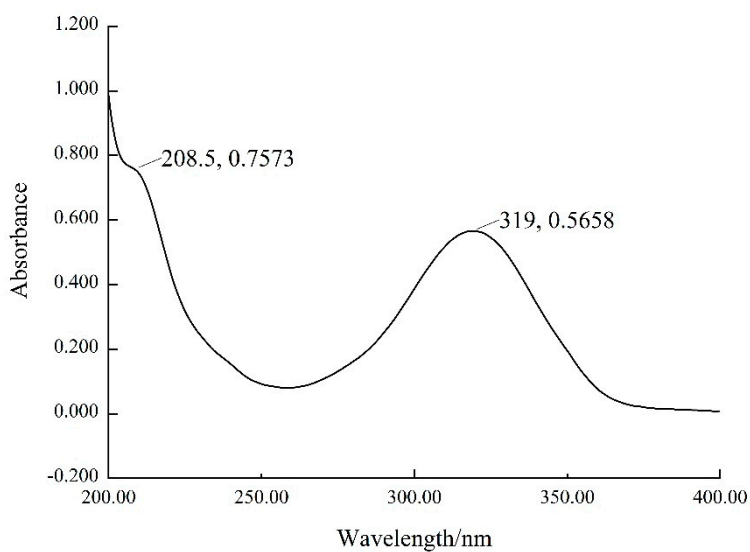

Figure S85. UV spectrum of nemanecin E (**26**)

202401024-CS258-F49\_240124115645 #71-73 RT: 0.63-0.65 AV: 3 NL: 2.36E7  
T: FTMS + p ESI Full ms [200.00-1000.00]

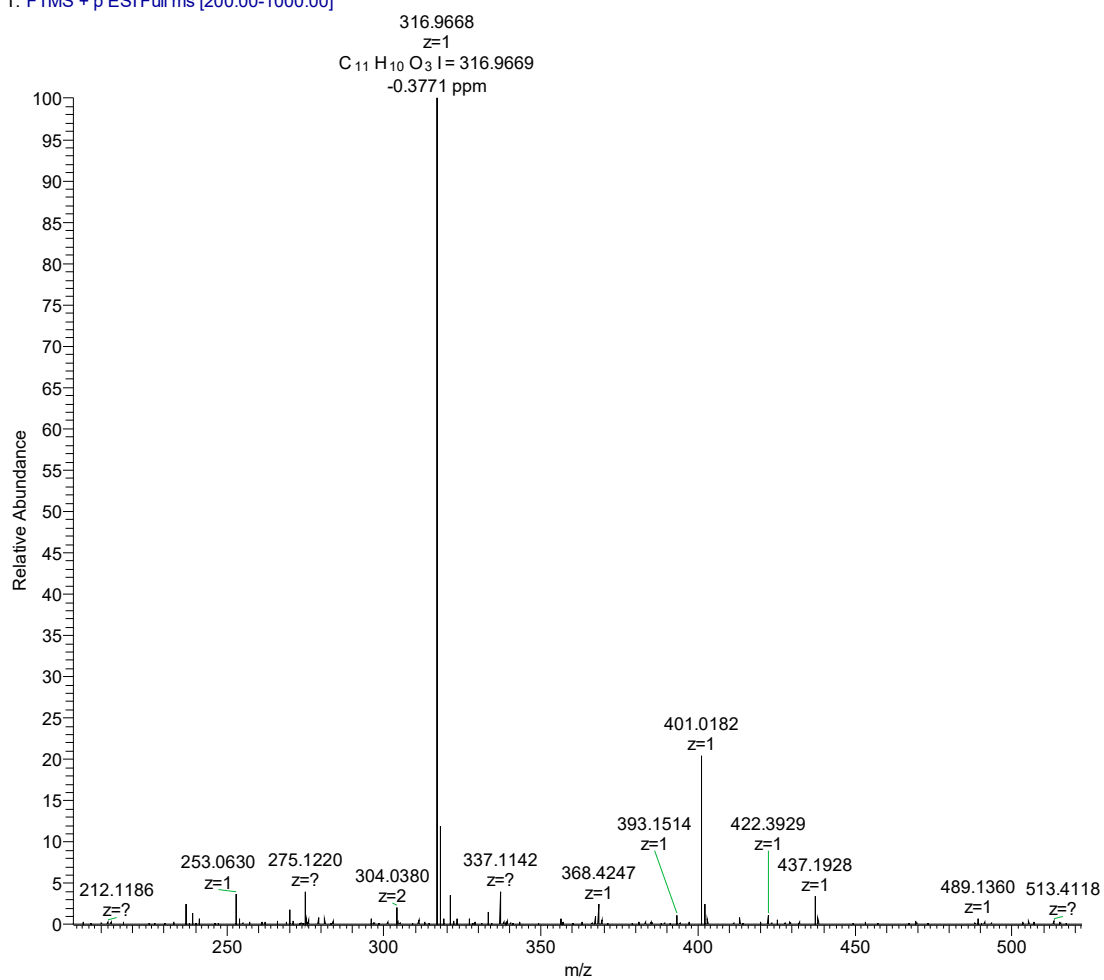

Figure S86. HRESIMS spectrum of 2,5-dimethy-8-iodochromone (**27**)

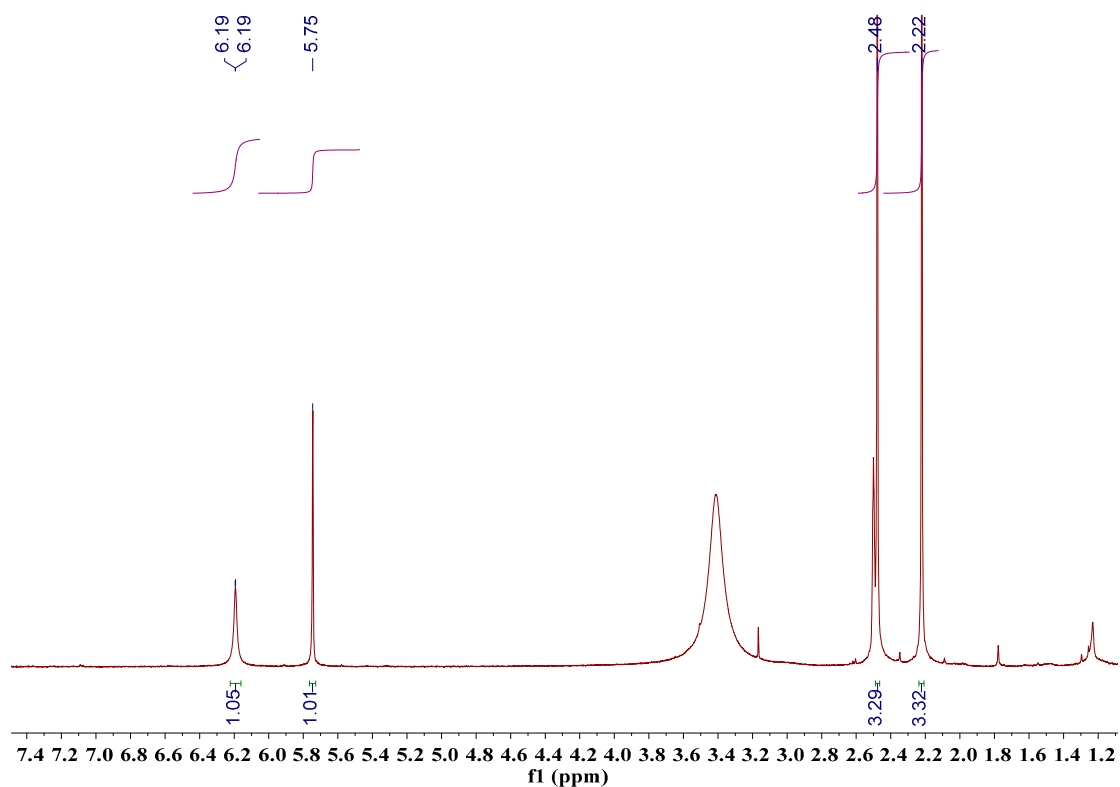

Figure S87. <sup>1</sup>H NMR spectrum (500 MHz, DMSO) of 2,5-dimethy-8-iodochromone (27)

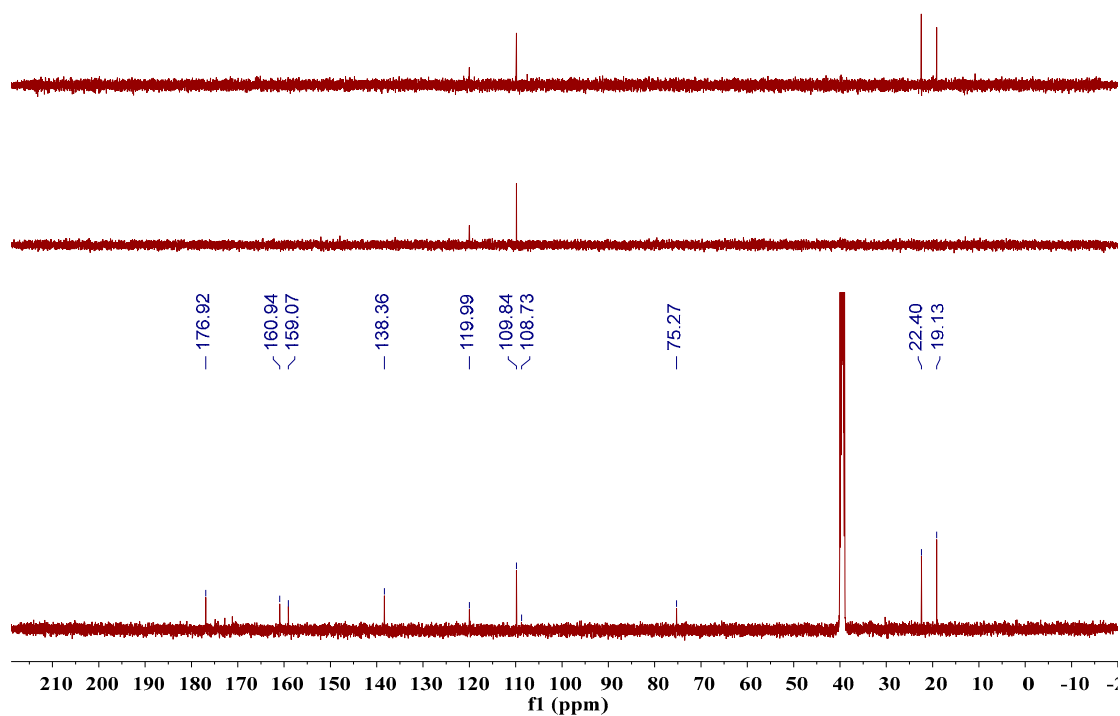

Figure S88. <sup>13</sup>C NMR spectrum (125 MHz, DMSO) of 2,5-dimethy-8-iodochromone (27)

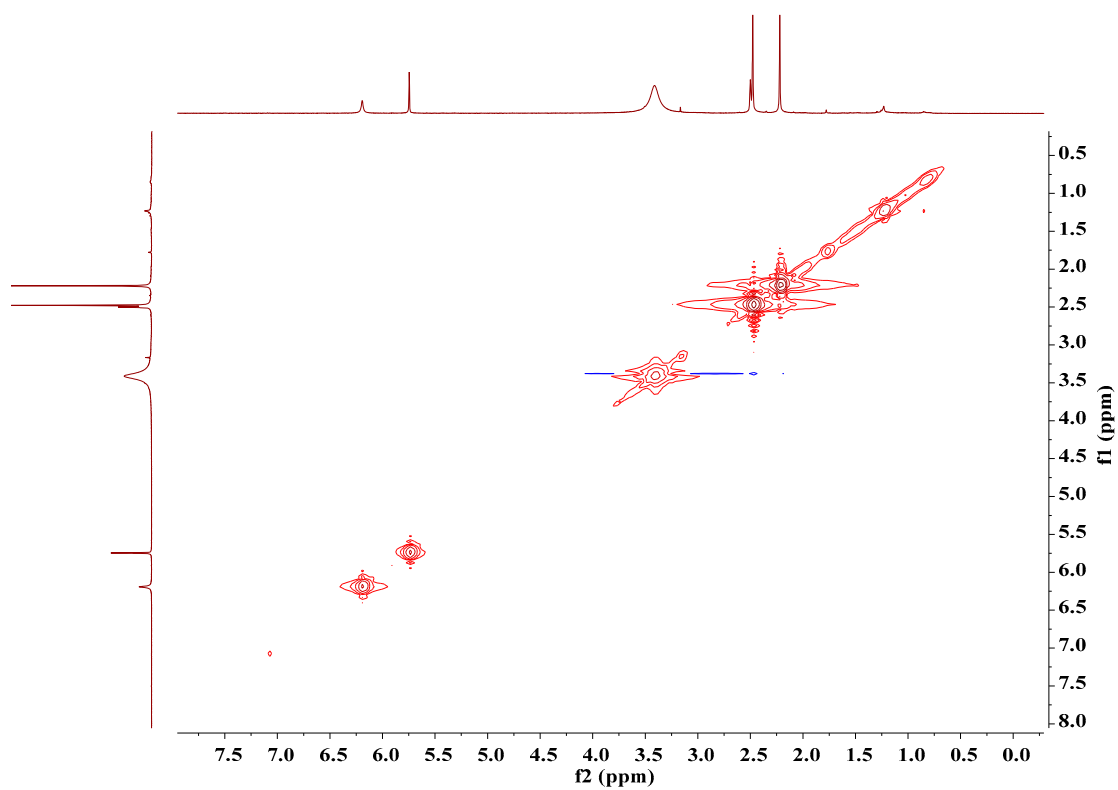

Figure S89.  $^1\text{H}$ - $^1\text{H}$  COSY spectrum of 2,5-dimethy-8-iodochromone (**27**)

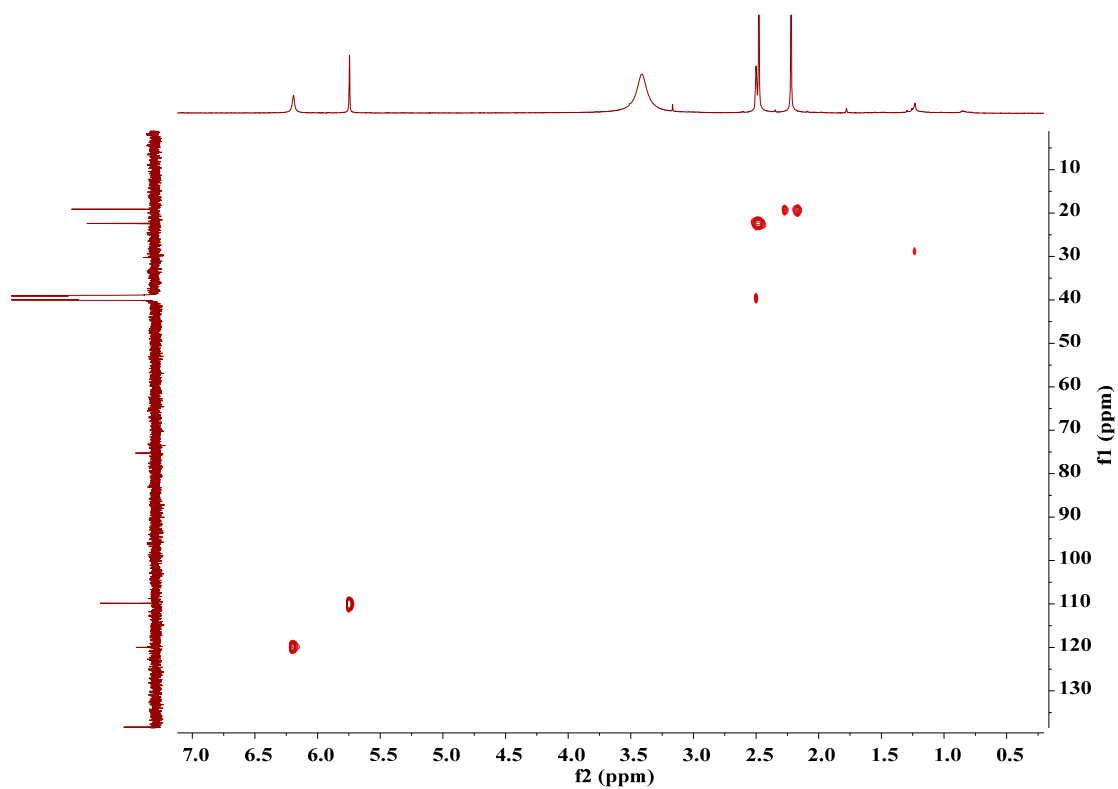

Figure S90. HSQC spectrum of 2,5-dimethy-8-iodochromone (**27**)



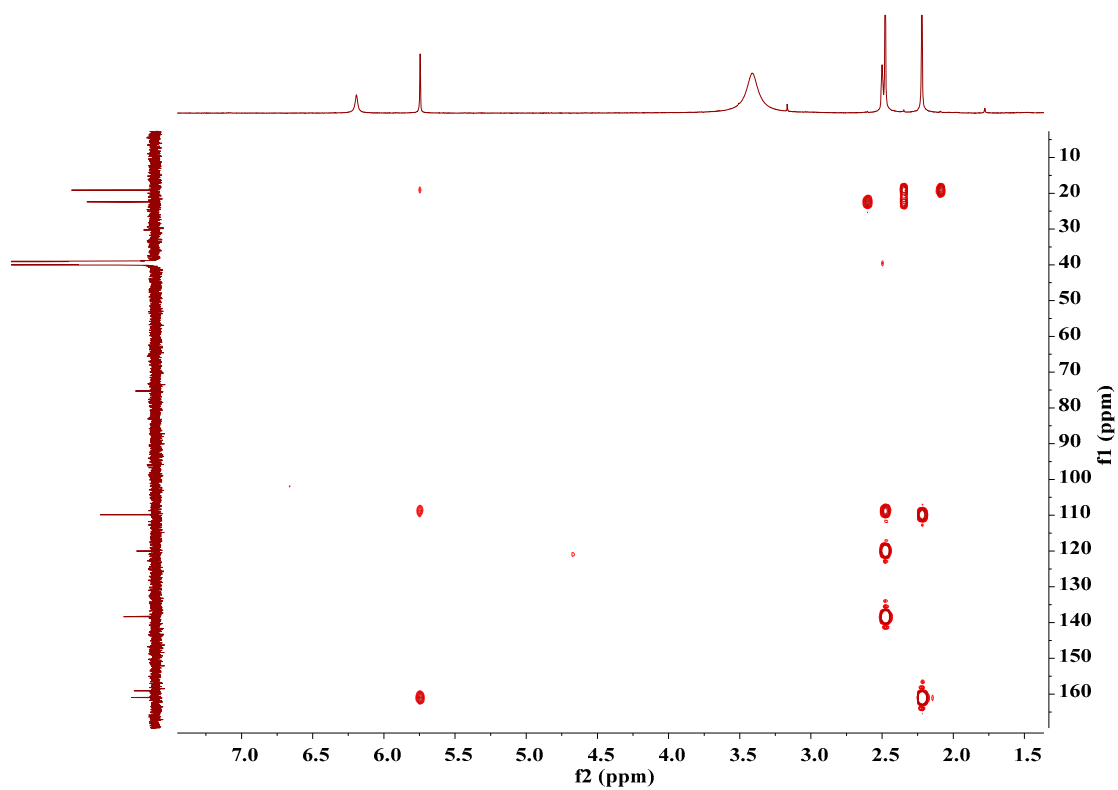

Figure S91. HMBC spectrum of 2,5-dimethy-8-iodochromone (**27**)

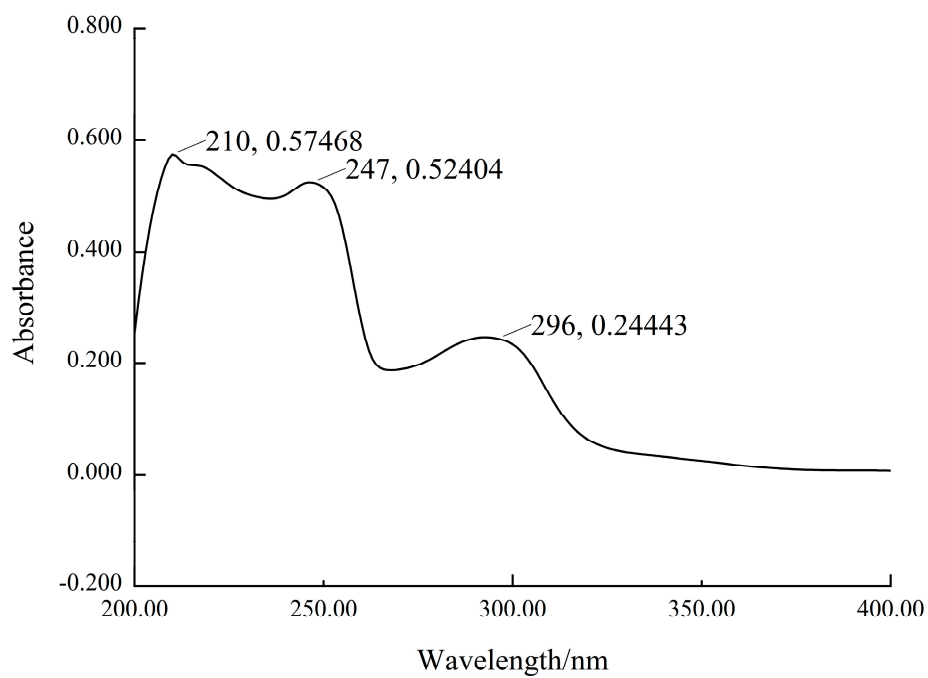

Figure S92. UV spectrum of 2,5-dimethy-8-iodochromone (**27**)

20231016-CS258-I96\_231016171555 #5 RT: 0.04 AV: 1 NL: 1.67E6  
T: FTMS + p ESI Full ms [180.00-1000.00]

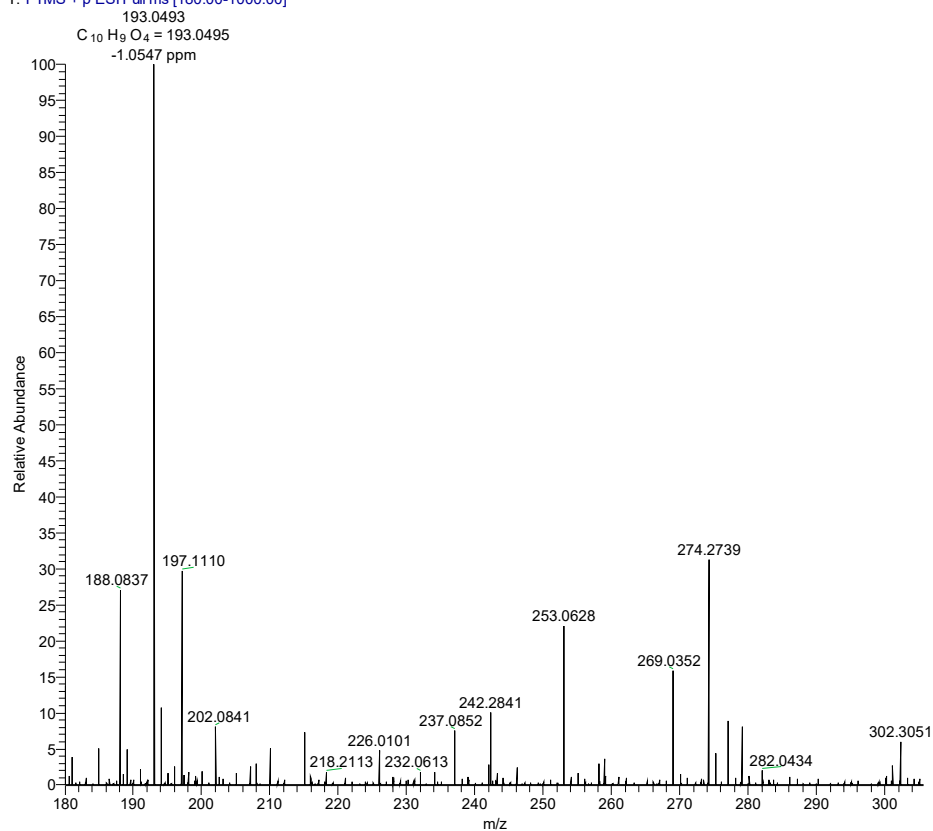

Figure S93. HRESIMS spectrum of 6-hydroxy-4-methoxycoumarin (**28**)

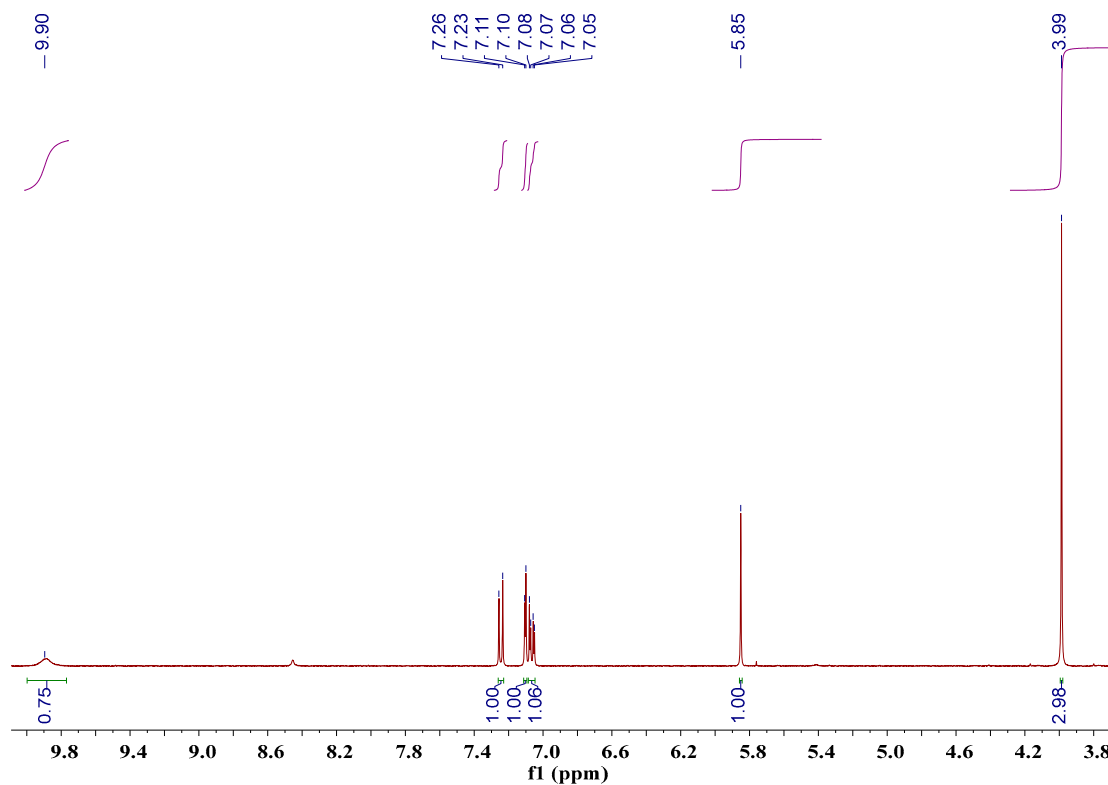

Figure S94. <sup>1</sup>H NMR spectrum (400 MHz, DMSO) of 6-hydroxy-4-methoxycoumarin (**28**)

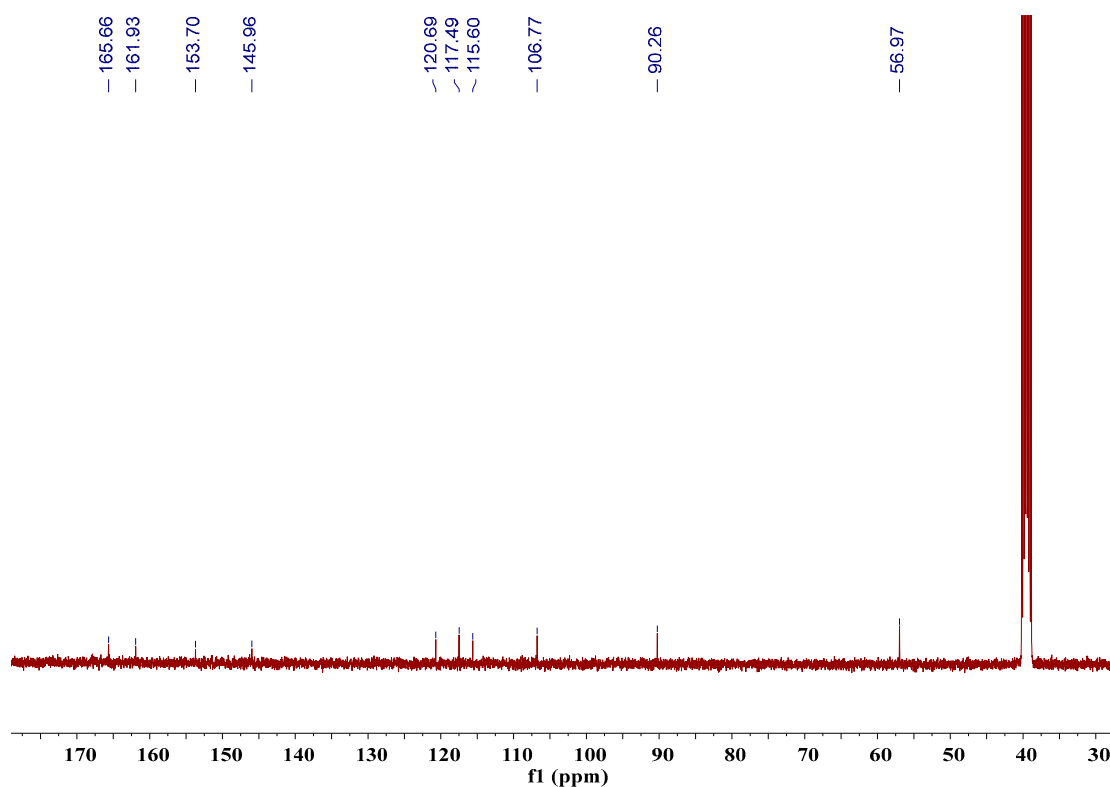

Figure S95.  $^{13}\text{C}$  NMR spectrum (100 MHz, DMSO) of 6-hydroxy-4-methoxycoumarin (**28**)

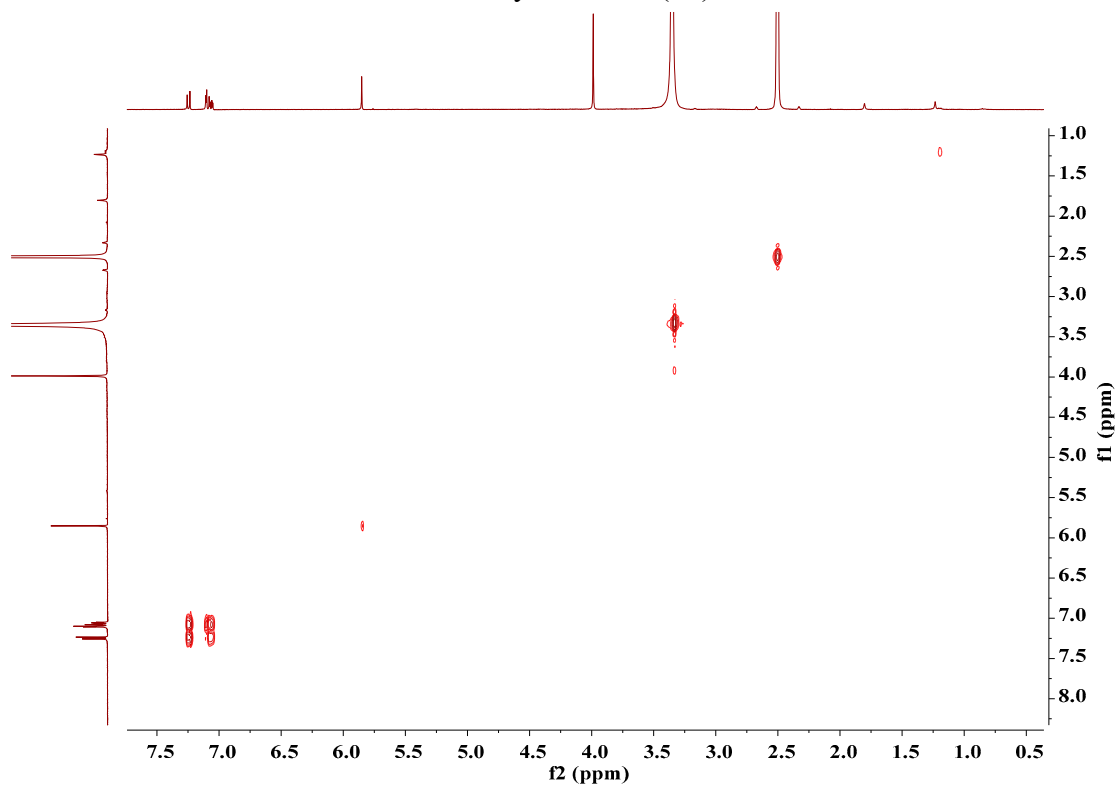

Figure S96.  $^1\text{H}$ - $^1\text{H}$  COSY spectrum of 6-hydroxy-4-methoxycoumarin (**28**)

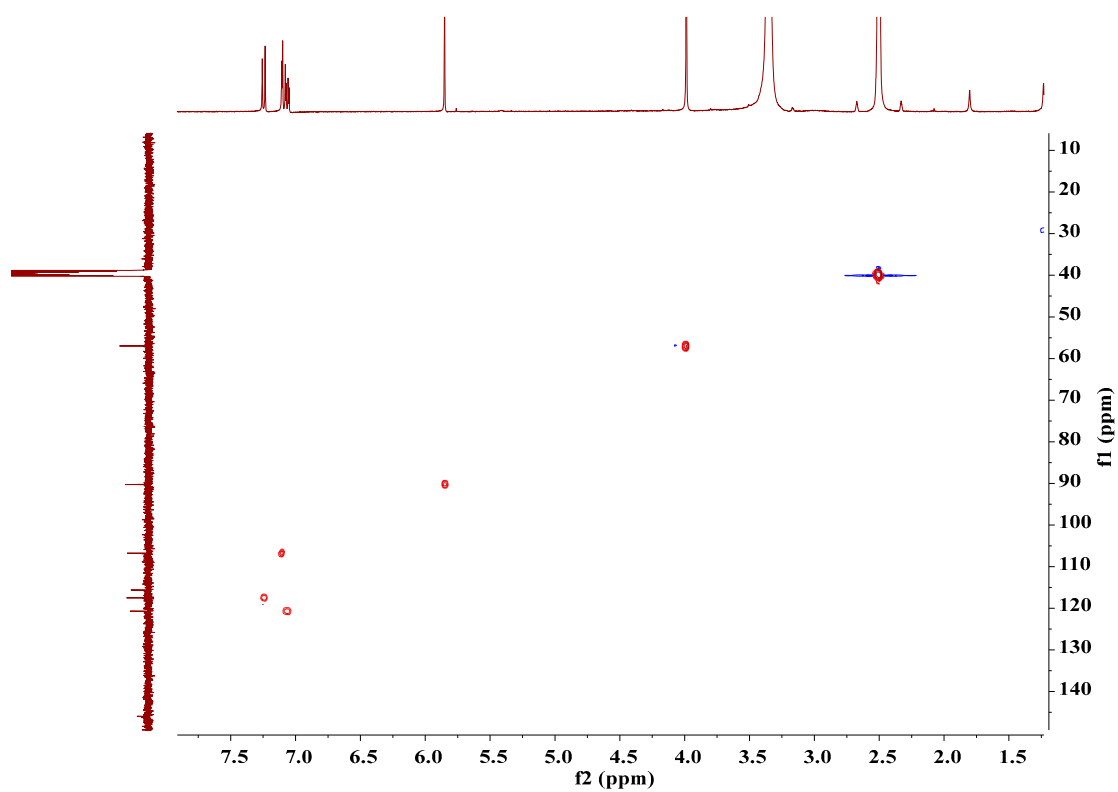

Figure S97. HSQC spectrum of 6-hydroxy-4-methoxycoumarin (28)

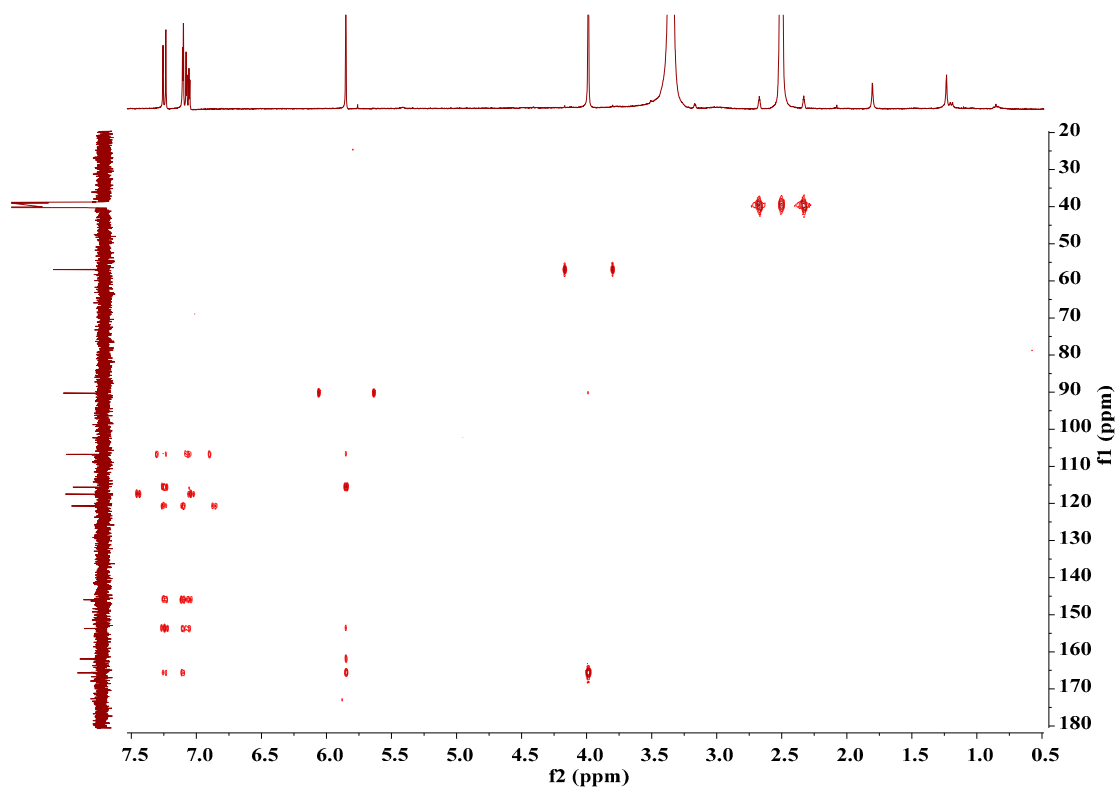

Figure S98. HMBC spectrum of 6-hydroxy-4-methoxycoumarin (28)

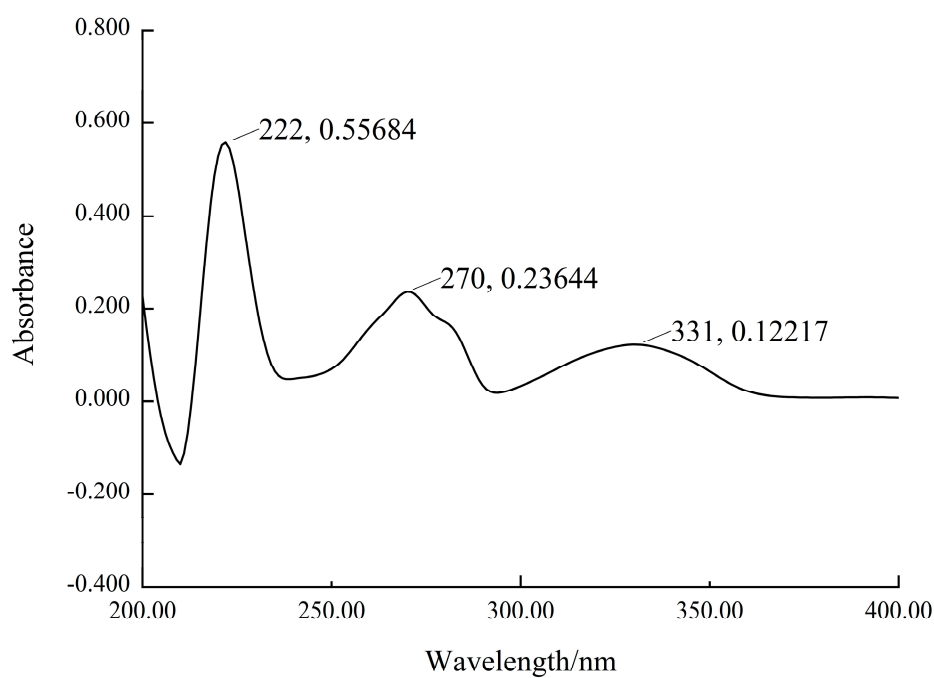

Figure S99. UV spectrum of 6-hydroxy-4-methoxycoumarin (**28**)

20231016-CS258-I129\_231016171555 #40 RT: 0.32 AV: 1 NL: 1.31E7  
T: FTMS + p ESI Full ms [175.00-1000.00]

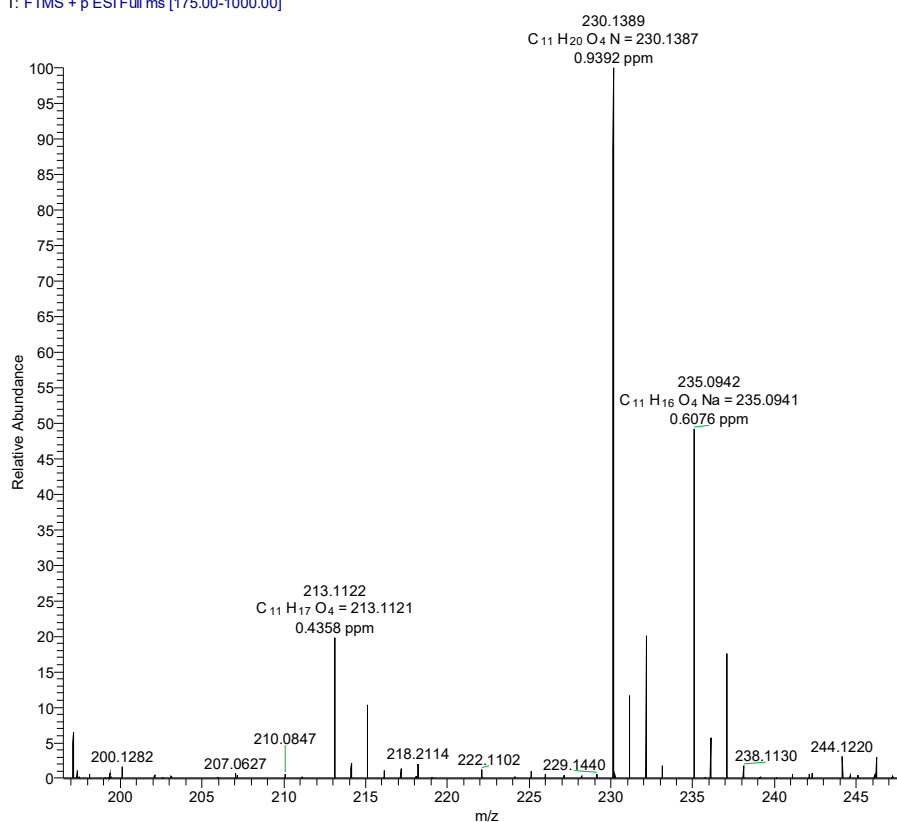

Figure S100. HRESIMS spectrum of talarofurolactone A (**29**)

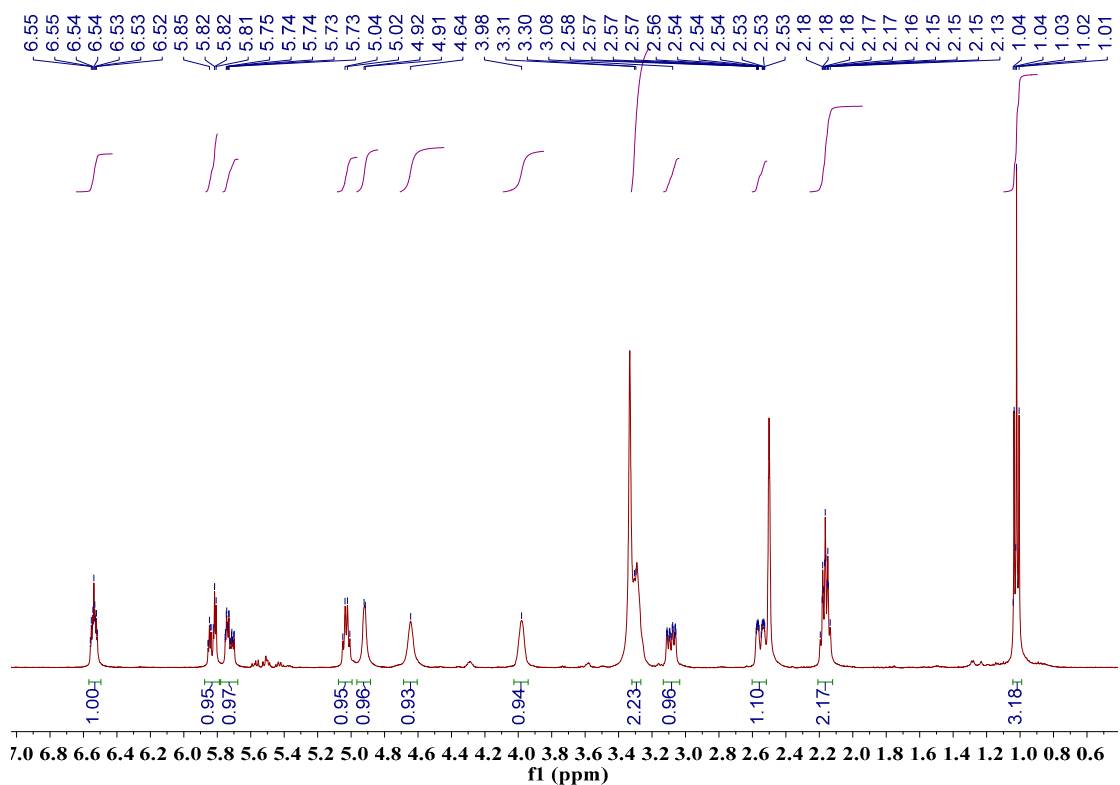

Figure S101. <sup>1</sup>H NMR spectrum (500 MHz, DMSO) of talarofurolactone A (**29**)

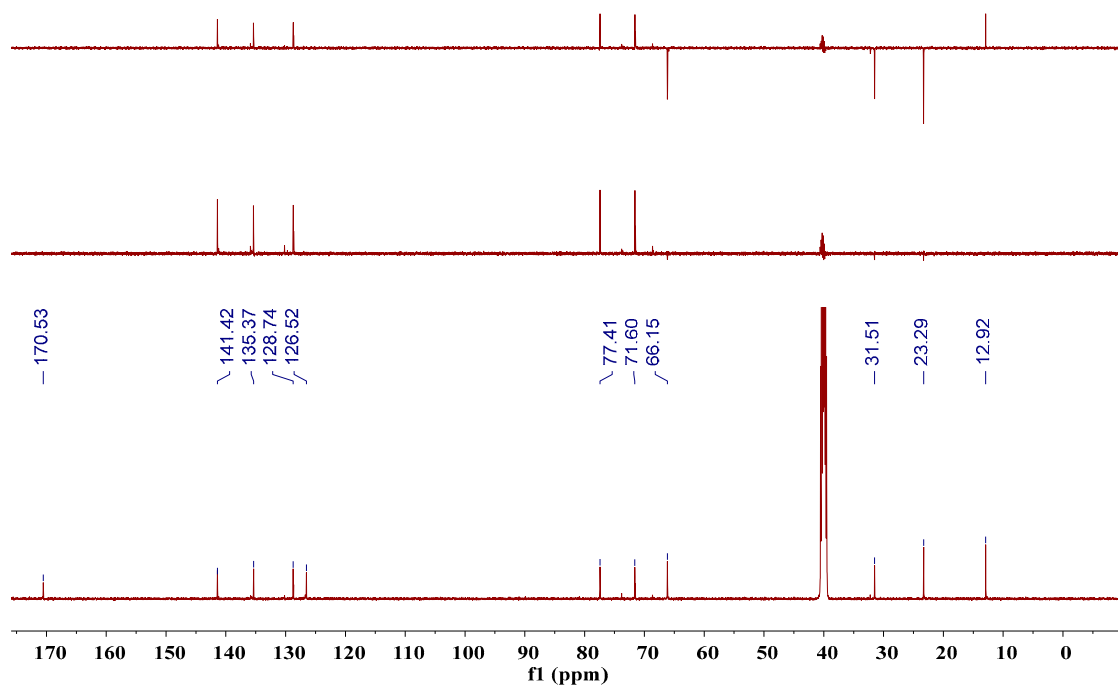

Figure S102. <sup>13</sup>C NMR spectrum (125 MHz, DMSO) of talarofurolactone A (**29**)

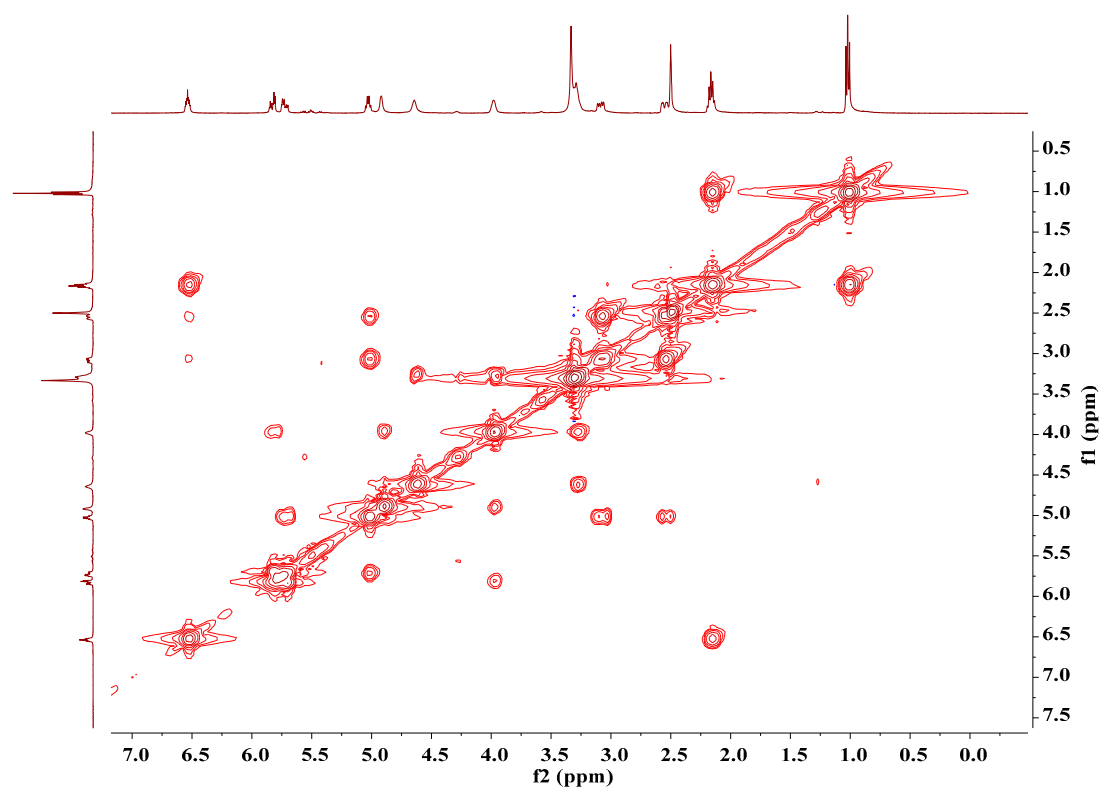

Figure S103.  $^1\text{H}$ - $^1\text{H}$  COSY spectrum of talarofurolactone A (**29**)

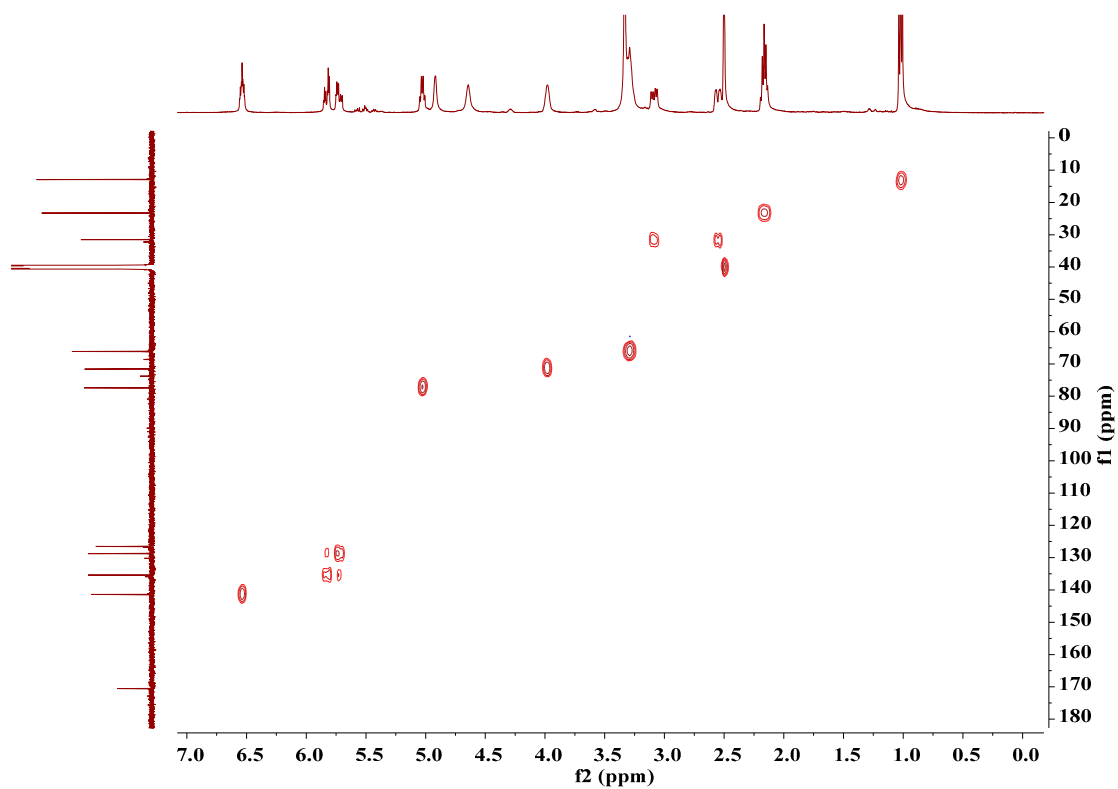

Figure S104. HSQC spectrum of talarofurolactone A (**29**)

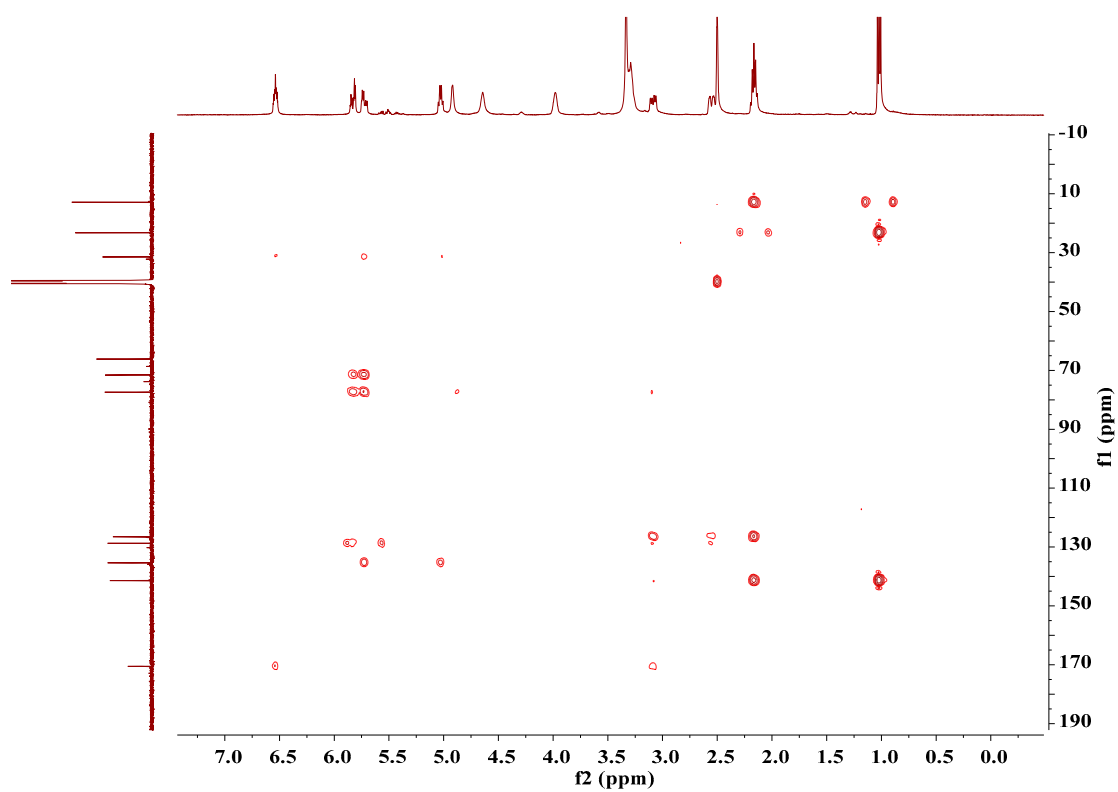

Figure S105. HMBC spectrum of talarofurolactone A (20)

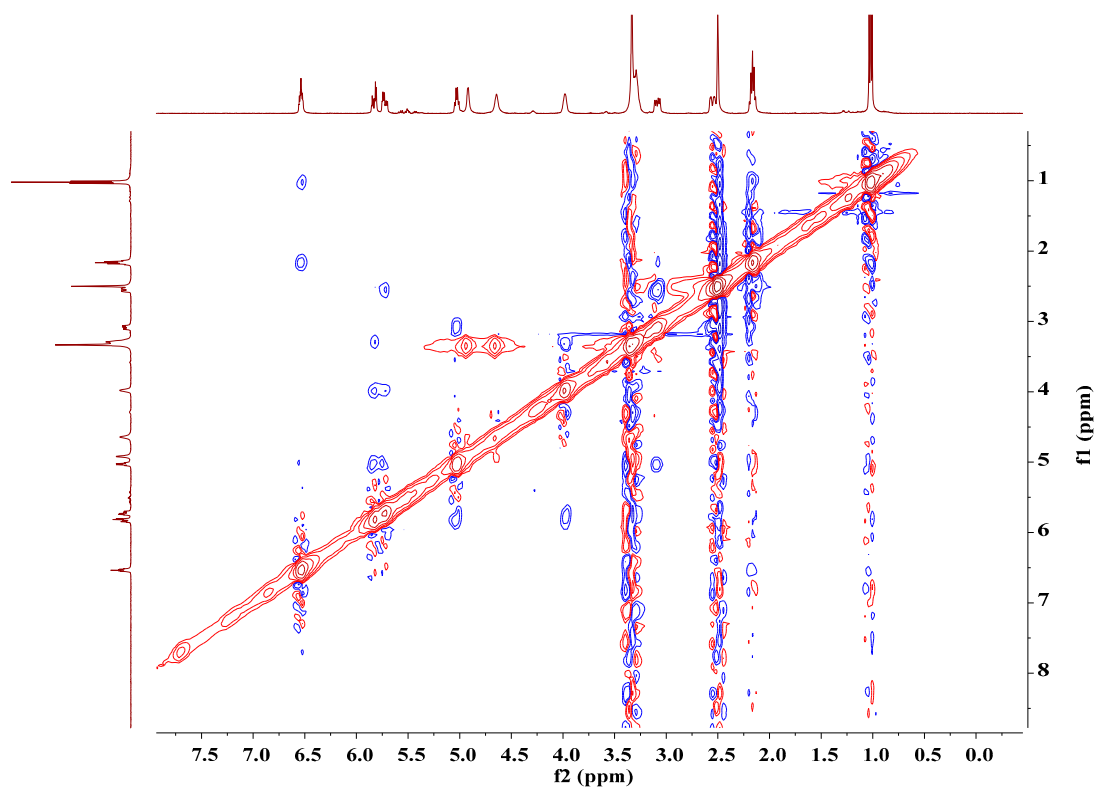

Figure S106. NOESY spectrum of talarofurolactone A (29)



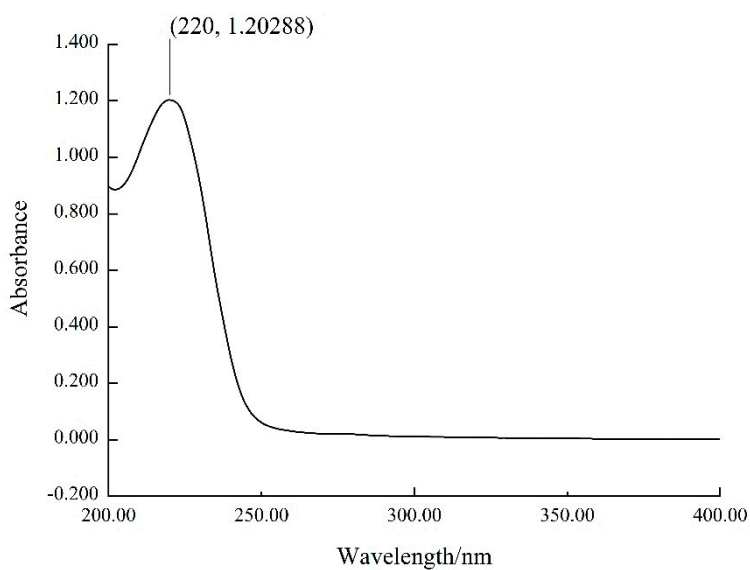

Figure S107. UV spectrum of talarofurolactone A (**29**)

Table S3. Energy analysis for the conformers of (3*R*,5'*R*)-5-hydroxytalaroflavone (**1**)

| Compound | Conformations | G (Hartree) | G (Kcal/mol) | $\Delta G$<br>(Kcal/mol) | Boltzmann<br>Dist (%) |
|----------|---------------|-------------|--------------|--------------------------|-----------------------|
| <b>1</b> | <b>1-a</b>    | -952.6110   | -597772.4335 | 0.1870                   | 29.62%                |
|          | <b>1-b</b>    | -952.6113   | -597772.6205 | 0.0000                   | 40.63%                |
|          | <b>1-c</b>    | -952.6110   | -597772.4360 | 0.1845                   | 29.75%                |

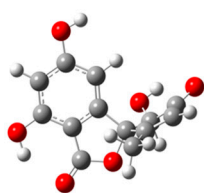

**1-a**

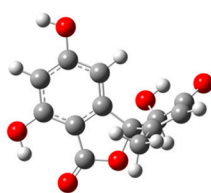

**1-b**

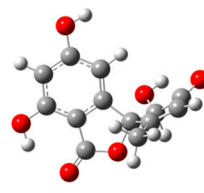

**1-c**

Figure S108. B3LYP/6-31G(d) optimized low-energy conformers of (3*R*,5'*R*)-5-hydroxytalaroflavone (**1**)

Table S4. Energy analysis for the conformers of (9*aS*)-talaroisochromenol A (**3**)

| Compound | Conformations | G (Hartree) | G (Kcal/mol) | $\Delta G$<br>(Kcal/mol) | Boltzmann<br>Dist (%) |
|----------|---------------|-------------|--------------|--------------------------|-----------------------|
| <b>3</b> | <b>3-a</b>    | -952.5774   | -597751.3366 | 5.4995                   | 0.01%                 |
|          | <b>3-b</b>    | -952.5861   | -597756.8361 | 0.0000                   | 56.32%                |
|          | <b>3-c</b>    | -952.5859   | -597756.6855 | 0.1506                   | 43.67%                |

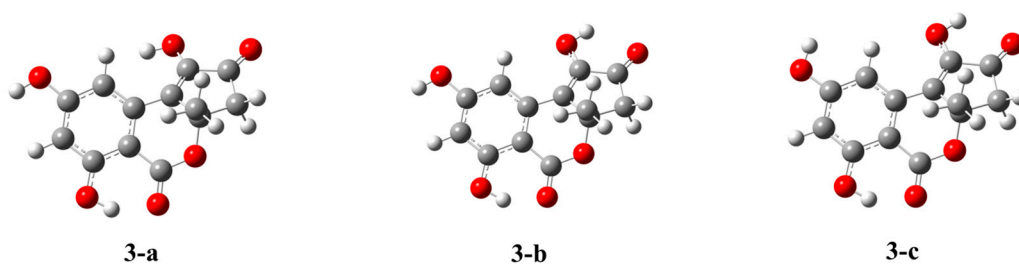

Figure S109. B3LYP/6-31G(d) optimized low-energy conformers of (9a*S*)-talaroisochromenol A (**3**)

Table S5. Energy analysis for the conformers of (7*R*,8*S*,9*R*)-talaroisochromenol B (**5**)

| Compound | Conformations | G (Hartree) | G (Kcal/mol) | $\Delta G$<br>(Kcal/mol) | Boltzmann<br>Dist (%) |
|----------|---------------|-------------|--------------|--------------------------|-----------------------|
| <b>5</b> | <b>5-a</b>    | -953.7940   | -598514.7841 | 0.0000                   | 43.57%                |
|          | <b>5-b</b>    | -953.7930   | -598514.1610 | 0.6231                   | 15.21%                |
|          | <b>5-c</b>    | -953.7922   | -598513.6697 | 1.1145                   | 6.63%                 |
|          | <b>5-d</b>    | -953.7932   | -598514.3242 | 0.4600                   | 20.04%                |
|          | <b>5-e</b>    | -953.7921   | -598513.6151 | 1.1691                   | 6.05%                 |
|          | <b>5-f</b>    | -953.7910   | -598512.9254 | 1.8587                   | 1.89%                 |
|          | <b>5-g</b>    | -953.7914   | -598513.1658 | 1.6183                   | 2.83%                 |
|          | <b>5-h</b>    | -953.7914   | -598513.1953 | 1.5889                   | 2.98%                 |
|          | <b>5-i</b>    | -953.7902   | -598512.4197 | 2.3645                   | 0.80%                 |

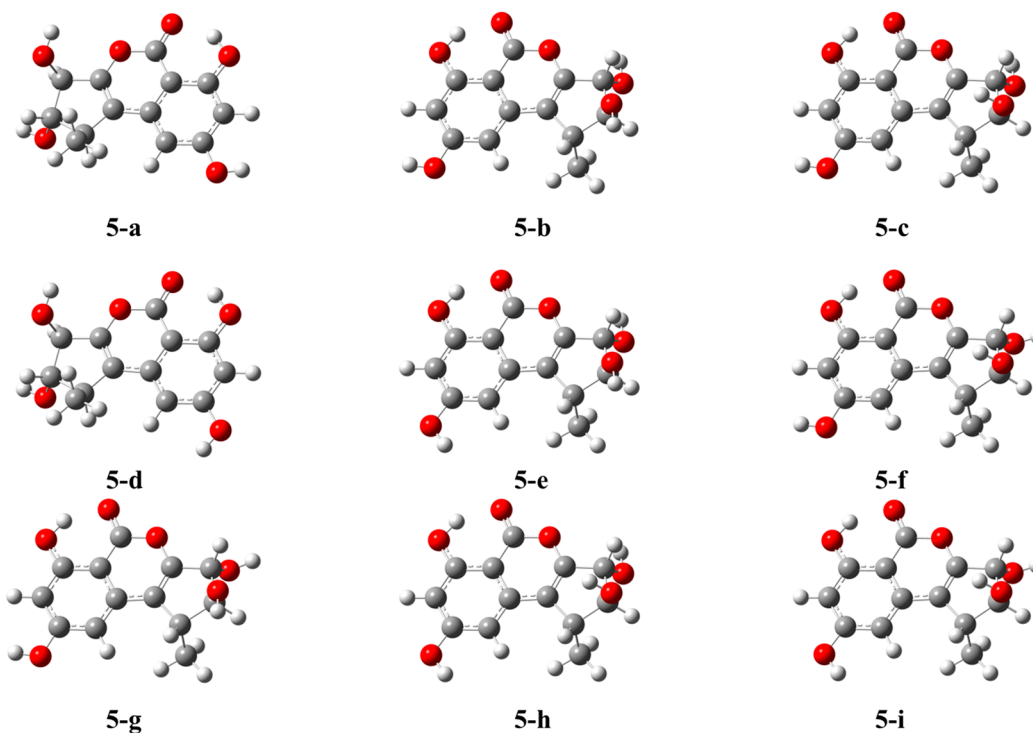

Figure S110. B3LYP/6-31G(d) optimized low-energy conformers of (7*R*,8*S*,9*R*)-  
talaroisochromenol B (**5**)

Table S6. Energy analysis for the conformers of (3*aS*, 9*bS*)-talaroisochromenol C (**11**)

| Compound  | Conformations | G (Hartree) | G (Kcal/mol) | $\Delta G$<br>(Kcal/mol) | Boltzmann<br>Dist (%) |
|-----------|---------------|-------------|--------------|--------------------------|-----------------------|
| <b>11</b> | <b>11-a</b>   | -914.5003   | -573857.6549 | 1.5198                   | 4.79%                 |
|           | <b>11-b</b>   | -914.5028   | -573859.1747 | 0.0000                   | 62.40%                |
|           | <b>11-c</b>   | -914.5019   | -573858.6137 | 0.5610                   | 24.19%                |
|           | <b>11-d</b>   | -914.5003   | -573857.6555 | 1.5192                   | 4.80%                 |
|           | <b>11-e</b>   | -914.5001   | -573857.5200 | 1.6547                   | 3.81%                 |

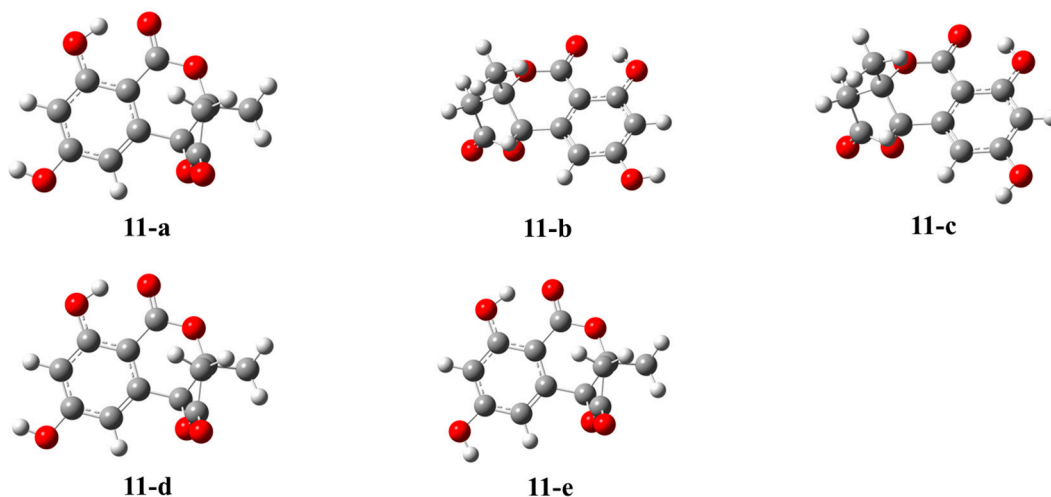

Figure S111. B3LYP/6-31G(d) optimized low-energy conformers of (3*aS*, 9*bS*)-  
talaroisochromenol C (**11**)

Table S7. Energy analysis for the conformers of (8*R*,9*R*,10*aR*)-5-hydroxyaltenuene (**13**)

| Compound  | Conformations | G (Hartree) | G (Kcal/mol) | $\Delta G$<br>(Kcal/mol) | Boltzmann<br>Dist (%) |
|-----------|---------------|-------------|--------------|--------------------------|-----------------------|
| <b>13</b> | <b>13-a</b>   | -993.0736   | -623163.0944 | 1.8185                   | 2.02%                 |
|           | <b>13-b</b>   | -993.0765   | -623164.9129 | 0.0000                   | 43.54%                |
|           | <b>13-c</b>   | -993.0736   | -623163.0944 | 1.8185                   | 2.02%                 |
|           | <b>13-d</b>   | -993.0757   | -623164.4322 | 0.4807                   | 19.33%                |
|           | <b>13-e</b>   | -993.0756   | -623164.3902 | 0.5227                   | 18.01%                |
|           | <b>13-f</b>   | -993.0753   | -623164.1724 | 0.7405                   | 12.47%                |
|           | <b>13-g</b>   | -993.0724   | -623162.3639 | 2.5489                   | 0.59%                 |
|           | <b>13-h</b>   | -993.0736   | -623163.0962 | 1.8166                   | 2.02%                 |

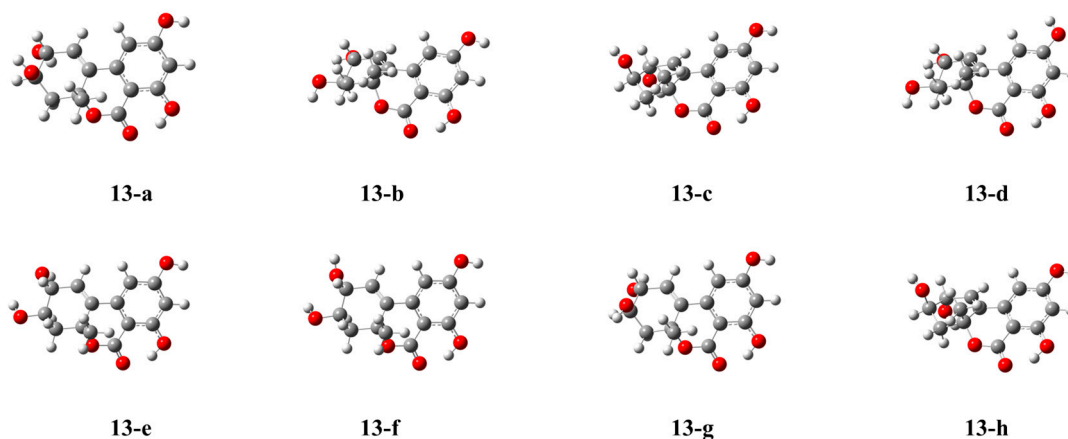

Figure S112. B3LYP/6-31G(d) optimized low-energy conformers of (8*R*,9*R*,10*aR*)-5-hydroxyaltenuene (**13**)

Table S8. Energy analysis for the conformers of (8*S*,9*S*,10*aR*)-5-hydroxyaltenuene (*ent*-**14**)

| Compound  | Conformations | G (Hartree) | G (Kcal/mol) | $\Delta G$<br>(Kcal/mol) | Boltzmann<br>Dist (%) |
|-----------|---------------|-------------|--------------|--------------------------|-----------------------|
| <b>14</b> | <b>14-a</b>   | -993.0764   | -623164.8984 | 0.3025                   | 13.16%                |
|           | <b>14-b</b>   | -993.0769   | -623165.2009 | 0.0000                   | 21.94%                |
|           | <b>14-c</b>   | -993.0764   | -623164.8972 | 0.3037                   | 13.13%                |
|           | <b>14-d</b>   | -993.0760   | -623164.6380 | 0.5629                   | 8.48%                 |
|           | <b>14-e</b>   | -993.0763   | -623164.8012 | 0.3997                   | 11.17%                |
|           | <b>14-f</b>   | -993.0765   | -623164.9631 | 0.2378                   | 14.68%                |
|           | <b>14-g</b>   | -993.0764   | -623164.8997 | 0.3012                   | 13.19%                |
|           | <b>14-h</b>   | -993.0754   | -623164.2289 | 0.9720                   | 4.25%                 |

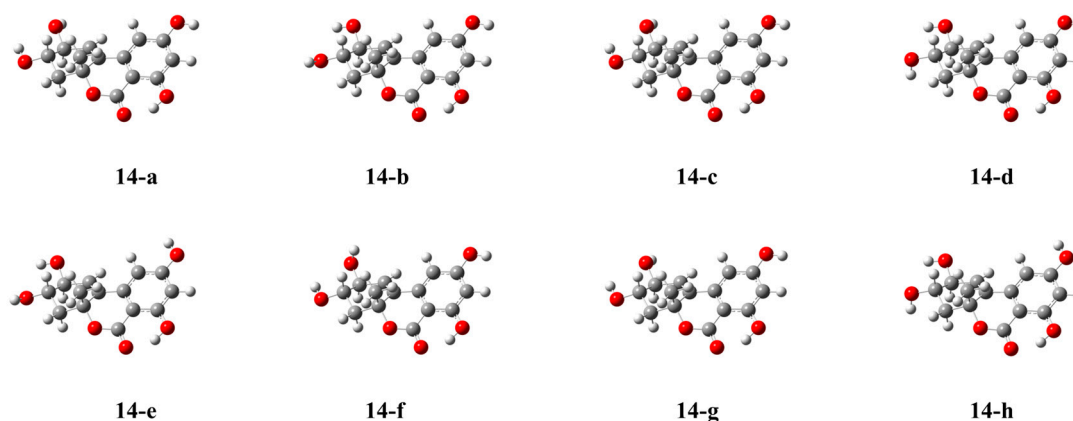

Figure S113. B3LYP/6-31G(d) optimized low-energy conformers of (8*S*,9*S*,10*aR*)-5-hydroxyaltenuene (*ent*-**14**)

Table S9. Energy analysis for the conformers of (8*R*,9*S*,10*aR*)-5-hydroxyaltenuene (**15**)

| Compound  | Conformations | G (Hartree) | G (Kcal/mol) | $\Delta G$<br>(Kcal/mol) | Boltzmann<br>Dist (%) |
|-----------|---------------|-------------|--------------|--------------------------|-----------------------|
| <b>15</b> | <b>15-a</b>   | -993.0759   | -623164.5746 | 0.5466                   | 13.78%                |
|           | <b>15-b</b>   | -993.0756   | -623164.3782 | 0.7430                   | 9.89%                 |
|           | <b>15-c</b>   | -993.0759   | -623164.5684 | 0.5528                   | 13.64%                |
|           | <b>15-d</b>   | -993.0768   | -623165.1212 | 0.0000                   | 34.69%                |
|           | <b>15-e</b>   | -993.0762   | -623164.7403 | 0.3809                   | 18.23%                |
|           | <b>15-f</b>   | -993.0745   | -623163.6698 | 1.4514                   | 2.99%                 |
|           | <b>15-g</b>   | -993.0747   | -623163.8122 | 1.3090                   | 3.80%                 |
|           | <b>15-h</b>   | -993.0745   | -623163.6660 | 1.4552                   | 2.97%                 |

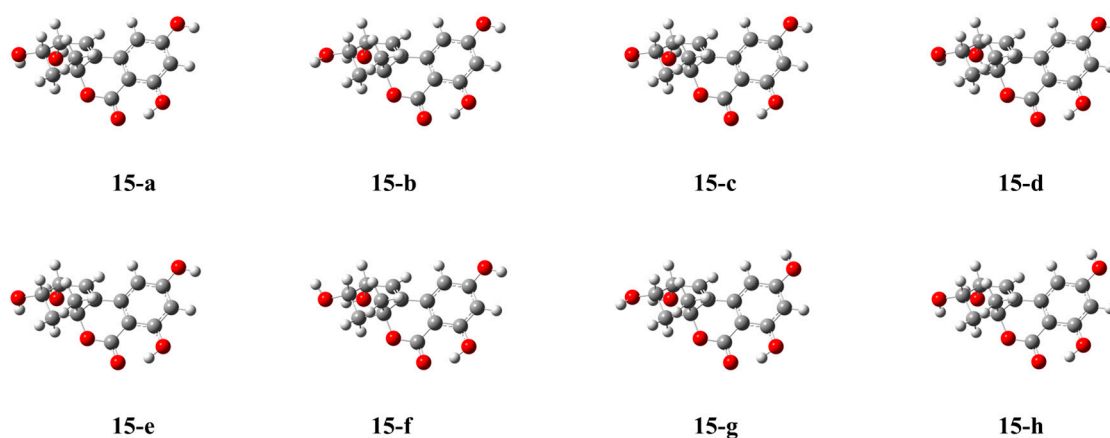Figure S114. B3LYP/6-31G(d) optimized low-energy conformers of (8*R*,9*S*,10*aR*)-5-hydroxyaltenuene (**15**)Table S10. Energy analysis for the conformers of (7*S*,8*R*,8*aR*,10*S*)-nemanecin D (**25a**)

| Compound   | Conformations | G (Hartree) | G (Kcal/mol) | $\Delta G$<br>(Kcal/mol) | Boltzmann<br>Dist (%) |
|------------|---------------|-------------|--------------|--------------------------|-----------------------|
| <b>25a</b> | <b>25a-a</b>  | -882.0324   | -553483.7003 | 12.1442                  | 0.00%                 |
|            | <b>25a-b</b>  | -882.0517   | -553495.8445 | 0.0000                   | 34.80%                |
|            | <b>25a-c</b>  | -882.0506   | -553495.1379 | 0.7066                   | 10.55%                |
|            | <b>25a-d</b>  | -882.0514   | -553495.6336 | 0.2108                   | 24.37%                |
|            | <b>25a-e</b>  | -882.0509   | -553495.2935 | 0.5510                   | 13.72%                |
|            | <b>25a-f</b>  | -882.0497   | -553494.5549 | 1.2895                   | 3.94%                 |
|            | <b>25a-g</b>  | -882.0500   | -553494.7432 | 1.1013                   | 5.42%                 |
|            | <b>25a-h</b>  | -882.0497   | -553494.5700 | 1.2745                   | 4.04%                 |
|            | <b>25a-i</b>  | -882.0483   | -553493.7047 | 2.1398                   | 0.94%                 |
|            | <b>25a-j</b>  | -882.0491   | -553494.2123 | 1.6322                   | 2.21%                 |

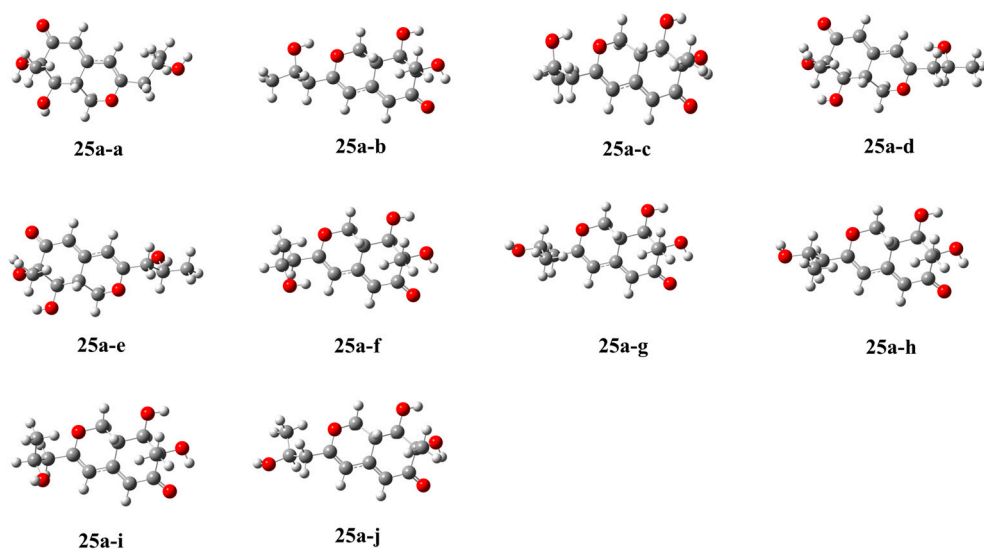

Figure S115. B3LYP/6-31G(d) optimized low-energy conformers of (7*S*,8*R*,8*aR*,10*S*)-nemanecin D (**25a**)

Table S11. Energy analysis for the conformers of (7*R*,8*S*,8*aS*,10*S*)-nemanecin D (**25b**)

| Compound   | Conformations | G (Hartree) | G (Kcal/mol) | $\Delta G$<br>(Kcal/mol) | Boltzmann<br>Dist (%) |
|------------|---------------|-------------|--------------|--------------------------|-----------------------|
| <b>25b</b> | <b>25b-a</b>  | -882.0330   | -553484.0818 | 11.8731                  | 0.00%                 |
|            | <b>25b-b</b>  | -882.0519   | -553495.9549 | 0.0000                   | 41.61%                |
|            | <b>25b-c</b>  | -882.0504   | -553494.9929 | 0.9620                   | 8.20%                 |
|            | <b>25b-d</b>  | -882.0515   | -553495.6957 | 0.2592                   | 26.86%                |
|            | <b>25b-e</b>  | -882.0501   | -553494.8430 | 1.1119                   | 6.36%                 |
|            | <b>25b-f</b>  | -882.0496   | -553494.4746 | 1.4803                   | 3.42%                 |
|            | <b>25b-g</b>  | -882.0501   | -553494.8103 | 1.1446                   | 6.02%                 |
|            | <b>25b-h</b>  | -882.0498   | -553494.6428 | 1.3121                   | 4.54%                 |
|            | <b>25b-i</b>  | -882.0485   | -553493.8094 | 2.1455                   | 1.11%                 |
|            | <b>25b-j</b>  | -882.0490   | -553494.1257 | 1.8292                   | 1.89%                 |

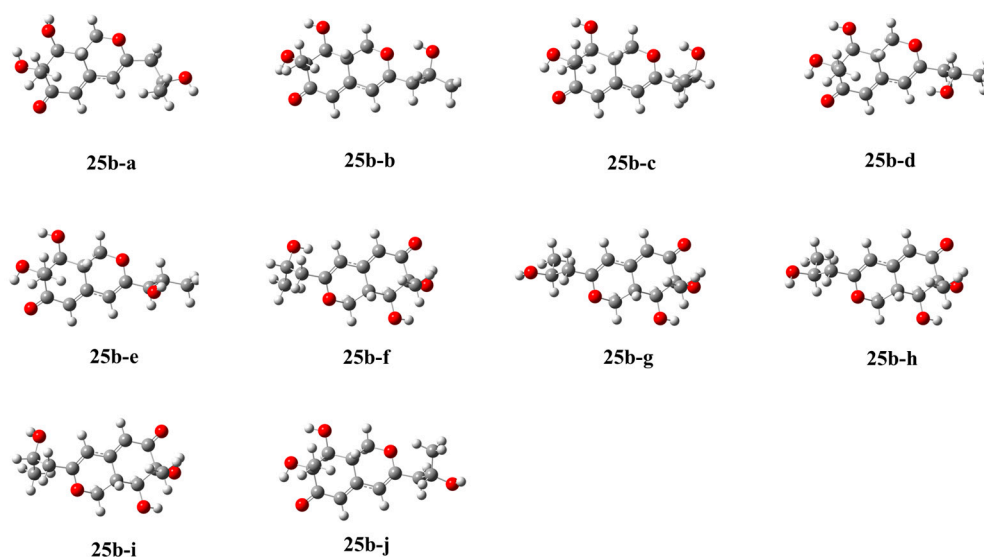

Figure S116. B3LYP/6-31G(d) optimized low-energy conformers of (7*R*,8*S*,8*aS*,10*S*)-nemanecin D (**25b**)

Table S12. Energy analysis for the conformers of (7*R*,8*S*,8*aS*,10*R*)-nemanecin E (**26a**)

| Compound   | Conformations | G (Hartree) | G (Kcal/mol) | $\Delta G$<br>(Kcal/mol) | Boltzmann<br>Dist (%) |
|------------|---------------|-------------|--------------|--------------------------|-----------------------|
| <b>26a</b> | <b>26a-a</b>  | -882.0363   | -553486.1287 | 9.7157                   | 0.00%                 |
|            | <b>26a-b</b>  | -882.0517   | -553495.8445 | 0.0000                   | 34.80%                |
|            | <b>26a-c</b>  | -882.0506   | -553495.1379 | 0.7066                   | 10.55%                |
|            | <b>26a-d</b>  | -882.0514   | -553495.6336 | 0.2108                   | 24.37%                |
|            | <b>26a-e</b>  | -882.0509   | -553495.2935 | 0.5510                   | 13.72%                |
|            | <b>26a-f</b>  | -882.0497   | -553494.5549 | 1.2895                   | 3.94%                 |
|            | <b>26a-g</b>  | -882.0500   | -553494.7432 | 1.1013                   | 5.42%                 |
|            | <b>26a-h</b>  | -882.0497   | -553494.5700 | 1.2745                   | 4.04%                 |
|            | <b>26a-i</b>  | -882.0483   | -553493.7040 | 2.1404                   | 0.94%                 |
|            | <b>26a-j</b>  | -882.0491   | -553494.2123 | 1.6322                   | 2.21%                 |

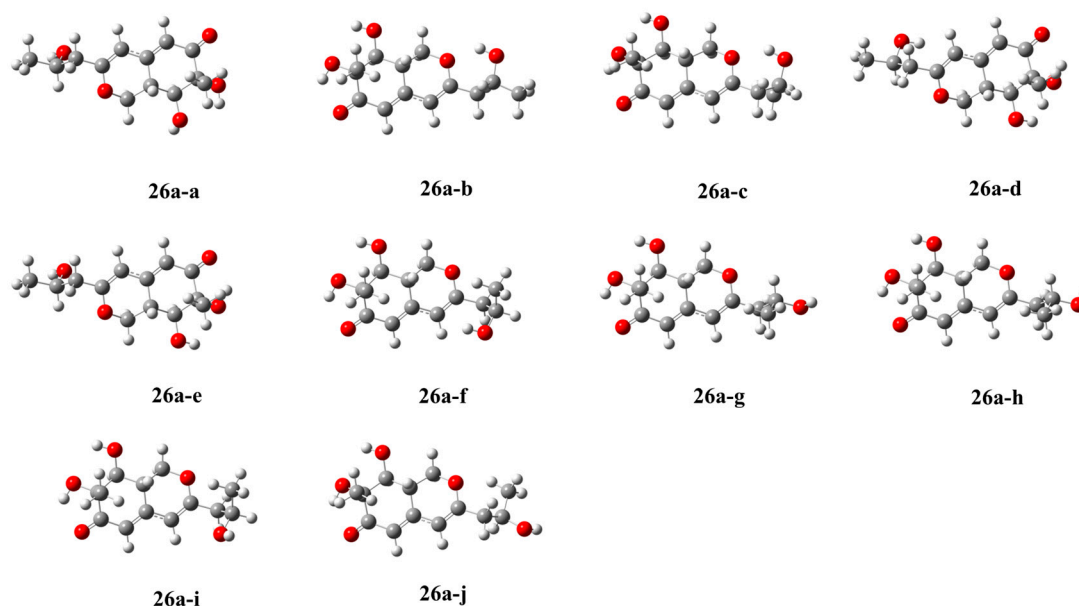

Figure S117. B3LYP/6-31G(d) optimized low-energy conformers of (7*R*,8*S*,8*aS*,10*R*)-nemanecin E (**26a**)

Table S13. Energy analysis for conformers of (7*S*,8*R*,8*aR*,10*R*)-nemanecin E (**26b**)

| Compound   | Conformations | G (Hartree) | G (Kcal/mol) | $\Delta G$<br>(Kcal/mol) | Boltzmann<br>Dist (%) |
|------------|---------------|-------------|--------------|--------------------------|-----------------------|
| <b>26b</b> | <b>26b-a</b>  | -882.0330   | -553484.0818 | 11.8731                  | 0.00%                 |
|            | <b>26b-b</b>  | -882.0519   | -553495.9549 | 0.0000                   | 41.61%                |
|            | <b>26b-c</b>  | -882.0504   | -553494.9929 | 0.9620                   | 8.20%                 |
|            | <b>26b-d</b>  | -882.0515   | -553495.6957 | 0.2592                   | 26.86%                |
|            | <b>26b-e</b>  | -882.0501   | -553494.8430 | 1.1119                   | 6.36%                 |
|            | <b>26b-f</b>  | -882.0496   | -553494.4746 | 1.4803                   | 3.42%                 |
|            | <b>26b-g</b>  | -882.0501   | -553494.8103 | 1.1446                   | 6.02%                 |
|            | <b>26b-h</b>  | -882.0498   | -553494.6428 | 1.3121                   | 4.54%                 |
|            | <b>26b-i</b>  | -882.0485   | -553493.8094 | 2.1455                   | 1.11%                 |
|            | <b>26b-j</b>  | -882.0490   | -553494.1257 | 1.8292                   | 1.89%                 |



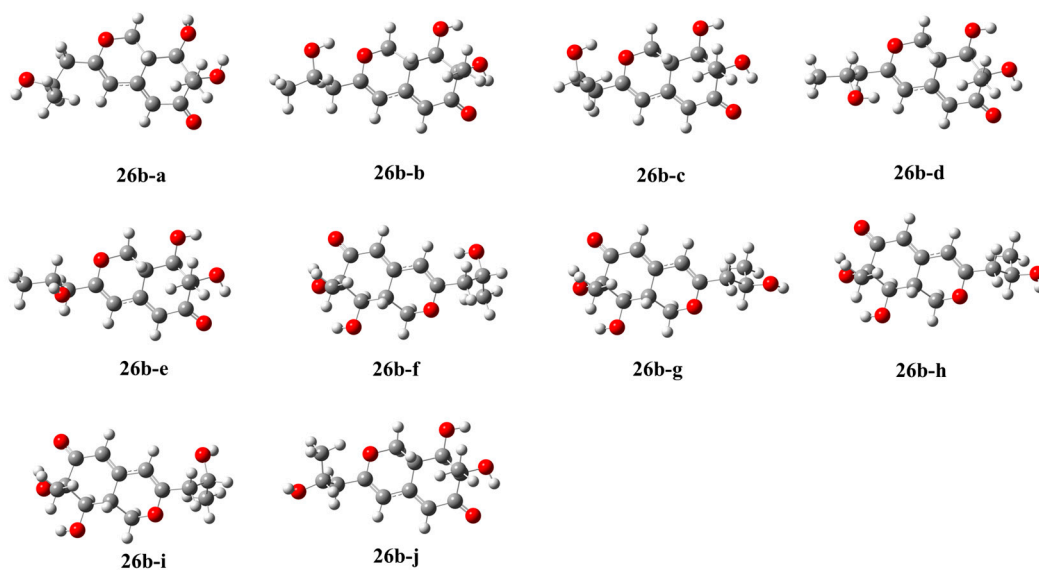

Figure S118. B3LYP/6-31G(d) optimized low-energy conformers of (7*S*,8*R*,8*aR*,10*R*)-nemanecin E (**26b**)

Table S14. Energy analysis for the conformers of (5*R*,3'*S*)-talarofurolactone A (**29a**)

| compound   | Conformations | G (Hartree) | G (Kcal/mol) | $\Delta G$<br>(Kcal/mol) | Boltzmann<br>Dist (%) |
|------------|---------------|-------------|--------------|--------------------------|-----------------------|
| <b>29a</b> | <b>29a-a</b>  | -729.4334   | -457726.3975 | 4.1585                   | 0.02%                 |
|            | <b>29a-b</b>  | -729.4391   | -457729.9448 | 0.6112                   | 9.47%                 |
|            | <b>29a-c</b>  | -729.4370   | -457728.6415 | 1.9145                   | 1.05%                 |
|            | <b>29a-d</b>  | -729.4399   | -457730.4701 | 0.0860                   | 23.00%                |
|            | <b>29a-e</b>  | -729.4394   | -457730.1243 | 0.4317                   | 12.83%                |
|            | <b>29a-f</b>  | -729.4380   | -457729.2847 | 1.2713                   | 3.11%                 |
|            | <b>29a-g</b>  | -729.4388   | -457729.7585 | 0.7976                   | 6.91%                 |
|            | <b>29a-h</b>  | -729.4400   | -457730.5560 | 0.0000                   | 26.59%                |
|            | <b>29a-i</b>  | -729.4373   | -457728.8480 | 1.7081                   | 1.49%                 |
|            | <b>29a-j</b>  | -729.4395   | -457730.2379 | 0.3181                   | 15.54%                |

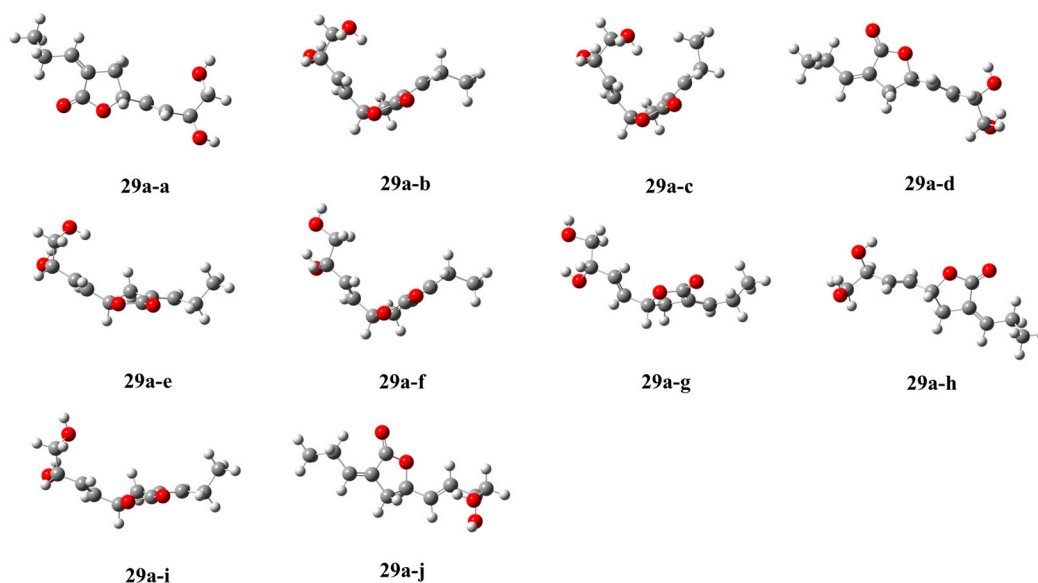

Figure S119. B3LYP/6-31G(d) optimized low-energy conformers of (5*R*,3'*S*)-talarofurolactone A (**29a**)

Table S15. Energy analysis for the conformers of (5*S*,3'*R*)-talarofurolactone A (**29b**)

| Compound   | Conformations | G (Hartree) | G (Kcal/mol) | $\Delta G$<br>(Kcal/mol) | Boltzmann<br>Dist (%) |
|------------|---------------|-------------|--------------|--------------------------|-----------------------|
| <b>29b</b> | <b>29b-a</b>  | -729.4380   | -457729.2935 | 1.2625                   | 3.06%                 |
|            | <b>29b-b</b>  | -729.4391   | -457729.9448 | 0.6112                   | 9.20%                 |
|            | <b>29b-c</b>  | -729.4399   | -457730.4701 | 0.0860                   | 22.34%                |
|            | <b>29b-d</b>  | -729.4394   | -457730.1243 | 0.4317                   | 12.46%                |
|            | <b>29b-e</b>  | -729.4380   | -457729.2847 | 1.2713                   | 3.02%                 |
|            | <b>29b-f</b>  | -729.4388   | -457729.7585 | 0.7976                   | 6.72%                 |
|            | <b>29b-g</b>  | -729.4400   | -457730.5560 | 0.0000                   | 25.83%                |
|            | <b>29b-h</b>  | -729.4373   | -457728.8480 | 1.7081                   | 1.44%                 |
|            | <b>29b-i</b>  | -729.4395   | -457730.2379 | 0.3181                   | 15.09%                |
|            | <b>29b-j</b>  | -729.4368   | -457728.5173 | 2.0388                   | 0.83%                 |

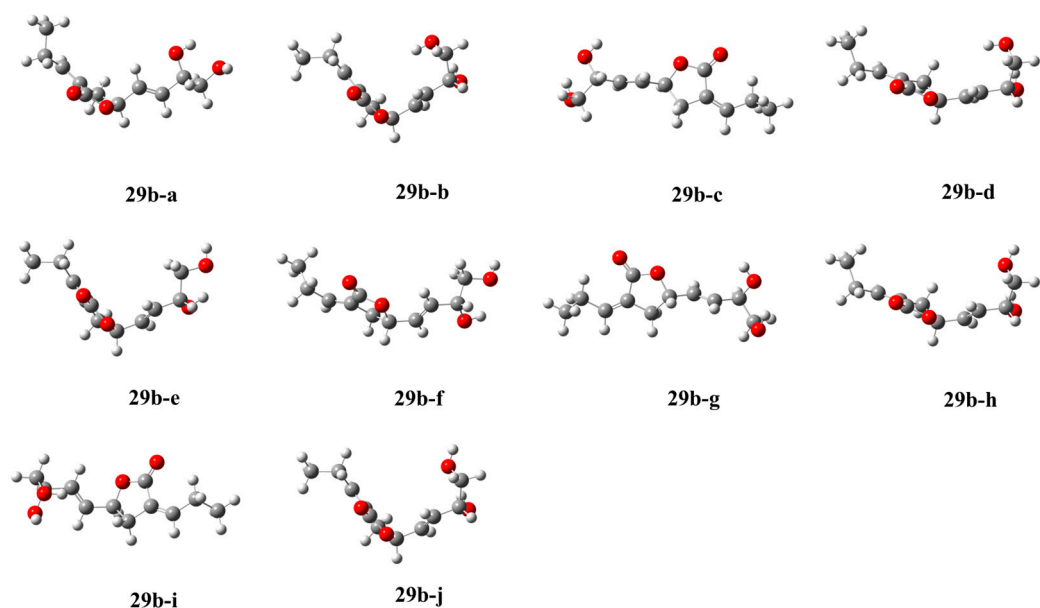

Figure S120. B3LYP/6-31G(d) optimized low-energy conformers of (5*S*,3'*R*)-talarofurolactone A (**29b**)

Table S16. DP4<sup>+</sup> probability analysis of **15** (mPW1PW91/6-31+G (d, p) level).

| mPW1PW91 |      | PCM          |            | 6-31+G(d, p) |          | Shielding Tensors |          |
|----------|------|--------------|------------|--------------|----------|-------------------|----------|
|          |      | DP4+         | 100.00%    | 0.00%        | –        | –                 | –        |
| Nuclei   | sp2? | Experimental | Isomer 1   | Isomer 2     | Isomer 3 | Isomer 4          | Isomer 5 |
| C        |      | 25.8         | 170.784105 | 170.262018   |          |                   |          |
| C        |      | 38.4         | 155.791038 | 152.97446    |          |                   |          |
| C        |      | 65.4         | 128.095174 | 122.828631   |          |                   |          |
| C        |      | 64.9         | 127.388112 | 119.712112   |          |                   |          |
| C        | x    | 127.8        | 68.775087  | 66.2734494   |          |                   |          |
| C        | x    | 167.7        | 30.5722995 | 30.1955163   |          |                   |          |
| C        |      | 81.6         | 111.564311 | 111.291715   |          |                   |          |
| C        | x    | 133.5        | 58.2025766 | 62.0206493   |          |                   |          |
| C        | x    | 163.2        | 34.3250061 | 34.5506101   |          |                   |          |
| C        | x    | 98.1         | 95.8505882 | 95.5230927   |          |                   |          |
| C        | x    | 138.2        | 57.6496827 | 57.7168437   |          |                   |          |
| C        | x    | 103.8        | 94.7742967 | 95.1237859   |          |                   |          |
| C        | x    | 165.8        | 35.7681723 | 35.755644    |          |                   |          |
| C        | x    | 102.7        | 95.3472487 | 95.4390424   |          |                   |          |
| H        |      | 1.43         | 30.0562755 | 30.00        |          |                   |          |
| H        |      | 1.9          | 29.523834  | 29.34        |          |                   |          |
| H        |      | 2.21         | 29.3665741 | 29.32        |          |                   |          |
| H        |      | 3.65         | 27.6844334 | 27.62        |          |                   |          |
| H        |      | 4.08         | 27.1528416 | 27.07        |          |                   |          |
| H        | x    | 6.28         | 24.7252154 | 25.00        |          |                   |          |
| H        | x    | 6.53         | 24.7127335 | 24.69        |          |                   |          |
| H        | x    | 6.28         | 24.9909073 | 25.01        |          |                   |          |

| Functional       | Solvent? |          | Basis Set    |          | Type of Data      |          |
|------------------|----------|----------|--------------|----------|-------------------|----------|
| mPW1PW91         | PCM      |          | 6-31+G(d, p) |          | Shielding Tensors |          |
|                  | Isomer 1 | Isomer 2 | Isomer 3     | Isomer 4 | Isomer 5          | Isomer 6 |
| sDP4+ (H data)   | 55.79%   | 44.21%   | –            | –        | –                 | –        |
| sDP4+ (C data)   | 99.98%   | 0.02%    | –            | –        | –                 | –        |
| sDP4+ (all data) | 99.98%   | 0.02%    | –            | –        | –                 | –        |
| uDP4+ (H data)   | 88.76%   | 11.24%   | –            | –        | –                 | –        |
| uDP4+ (C data)   | 100.00%  | 0.00%    | –            | –        | –                 | –        |
| uDP4+ (all data) | 100.00%  | 0.00%    | –            | –        | –                 | –        |
| DP4+ (H data)    | 90.89%   | 9.11%    | –            | –        | –                 | –        |
| DP4+ (C data)    | 100.00%  | 0.00%    | –            | –        | –                 | –        |
| DP4+ (all data)  | 100.00%  | 0.00%    | –            | –        | –                 | –        |

Table S17. The experimental and calculated chemical shifts (DP4+) of **15**

| C  | Exp. <b>15</b> | Calcd. <b>15-1</b><br>(TMS) | Calcd. <b>15-2</b><br>(TMS) | Calcd. <b>15-1</b><br>(DMSO) | Calcd. <b>15-2</b><br>(DMSO) |
|----|----------------|-----------------------------|-----------------------------|------------------------------|------------------------------|
| 3  | 25.8           | 25.7                        | 26.2                        | 21.4                         | 21.9                         |
| 4  | 38.4           | 40.6                        | 43.5                        | 36.4                         | 39.2                         |
| 5  | 65.4           | 68.3                        | 73.6                        | 64.1                         | 69.4                         |
| 6  | 64.9           | 69.1                        | 76.7                        | 64.8                         | 72.5                         |
| 7  | 127.8          | 127.7                       | 130.2                       | 123.4                        | 125.9                        |
| 11 | 167.7          | 165.9                       | 166.2                       | 161.6                        | 162.0                        |
| 13 | 81.6           | 84.9                        | 85.1                        | 80.6                         | 80.9                         |
| 14 | 133.5          | 138.2                       | 134.4                       | 134.0                        | 130.2                        |
| 15 | 163.2          | 162.1                       | 161.9                       | 157.9                        | 157.6                        |
| 16 | 98.1           | 100.6                       | 100.9                       | 96.3                         | 96.7                         |
| 17 | 138.2          | 138.8                       | 138.7                       | 134.5                        | 134.5                        |
| 18 | 103.8          | 101.7                       | 101.3                       | 97.4                         | 97.1                         |
| 19 | 165.8          | 160.7                       | 160.7                       | 156.4                        | 156.4                        |
| 20 | 102.7          | 101.1                       | 101.0                       | 96.8                         | 96.7                         |
| H  | Exp. <b>15</b> | Calcd. <b>15-1</b><br>(TMS) | Calcd. <b>15-2</b><br>(TMS) | Calcd. <b>15-1</b><br>(DMSO) | Calcd. <b>15-2</b><br>(DMSO) |
| 23 | 1.43           | 1.49                        | 1.55                        | 1.61                         | 1.67                         |
| 24 | 1.90           | 2.03                        | 2.21                        | 2.15                         | 2.33                         |
| 25 | 2.21           | 2.18                        | 2.23                        | 2.30                         | 2.35                         |
| 26 | 3.65           | 3.87                        | 3.93                        | 3.99                         | 4.05                         |
| 27 | 4.08           | 4.40                        | 4.48                        | 4.52                         | 4.60                         |
| 28 | 6.28           | 6.82                        | 6.55                        | 6.95                         | 6.67                         |
| 29 | 6.53           | 6.84                        | 6.86                        | 6.96                         | 6.98                         |
| 30 | 6.28           | 6.56                        | 6.54                        | 6.68                         | 6.66                         |
| 33 | 1.43           | 1.49                        | 1.55                        | 1.61                         | 1.67                         |
| 34 | 1.90           | 2.03                        | 2.21                        | 2.15                         | 2.33                         |

Table S18. The calculated shielding tensors of each conformer for isomer 1

(8*R*\*,9*S*\*,10*aR*\*-15)

| C  | 1-1      | 1-2      | 1-3      | 1-4      | 1-5      | 1-6      | 1-7      | 1-8      |
|----|----------|----------|----------|----------|----------|----------|----------|----------|
| 3  | 170.5265 | 170.6822 | 170.5273 | 170.9025 | 171.0157 | 170.5216 | 170.7311 | 171.0255 |
| 4  | 155.477  | 156.0299 | 155.4725 | 155.8586 | 155.6086 | 157.838  | 156.0501 | 155.854  |
| 5  | 127.9892 | 126.9829 | 127.996  | 128.785  | 128.0568 | 126.7198 | 127.0507 | 127.6466 |
| 6  | 127.4034 | 128.4829 | 127.4101 | 127.2124 | 126.8724 | 127.9148 | 128.5075 | 126.825  |
| 7  | 68.1488  | 68.4411  | 68.1525  | 69.8517  | 68.1111  | 68.0359  | 68.4958  | 68.2548  |
| 11 | 30.5779  | 30.5781  | 30.5481  | 30.581   | 30.5142  | 30.5815  | 30.7212  | 30.6932  |
| 13 | 111.2764 | 111.7894 | 111.252  | 111.6897 | 111.5809 | 111.3791 | 111.9438 | 111.7188 |
| 14 | 58.9167  | 58.9979  | 58.9201  | 56.6299  | 59.1529  | 59.4114  | 59.1616  | 59.0363  |
| 15 | 34.3742  | 34.2923  | 34.3525  | 34.3292  | 34.315   | 34.3339  | 34.2063  | 34.2349  |
| 16 | 95.7541  | 95.9586  | 95.7453  | 95.8829  | 95.9501  | 95.9275  | 95.6301  | 95.6387  |
| 17 | 57.4412  | 57.4011  | 57.436   | 57.9622  | 57.5513  | 57.3596  | 57.5938  | 57.7433  |
| 18 | 94.9214  | 94.6695  | 94.9221  | 94.5944  | 94.7973  | 94.7141  | 95.17315 | 95.2719  |
| 19 | 35.8113  | 35.7315  | 35.8072  | 35.7642  | 35.7667  | 35.7728  | 35.6731  | 35.6835  |
| 20 | 95.5089  | 95.4933  | 95.5116  | 95.1342  | 95.4726  | 95.5268  | 95.17315 | 95.1173  |
| H  | 1-1      | 1-2      | 1-3      | 1-4      | 1-5      | 1-6      | 1-7      | 1-8      |
| 23 | 29.8862  | 29.86    | 29.8859  | 29.894   | 29.8466  | 29.8297  | 29.8636  | 29.8483  |
| 24 | 30.1913  | 30.2379  | 30.1913  | 30.2252  | 30.2191  | 30.2157  | 30.2522  | 30.2338  |
| 25 | 30.0716  | 30.0989  | 30.0714  | 30.0733  | 30.0727  | 30.0651  | 30.1075  | 30.0772  |
| 26 | 29.51435 | 29.6538  | 29.5128  | 29.4832  | 29.5177  | 29.5316  | 29.6603  | 29.5154  |
| 27 | 29.1799  | 29.1236  | 29.1799  | 29.5886  | 29.4309  | 29.1904  | 29.1372  | 29.38195 |
| 28 | 27.6665  | 27.5165  | 27.6664  | 27.7349  | 27.7587  | 27.4784  | 27.526   | 27.7746  |
| 29 | 27.1322  | 27.0046  | 27.1318  | 27.2695  | 27.0757  | 27.198   | 27.0133  | 27.0831  |
| 30 | 24.73785 | 24.7369  | 24.73765 | 24.68095 | 24.7603  | 24.69605 | 24.79315 | 24.8146  |
| 33 | 24.73785 | 24.6691  | 24.73765 | 24.68095 | 24.693   | 24.69605 | 24.887   | 24.9131  |
| 34 | 25.015   | 25.0071  | 25.015   | 24.9925  | 25.0098  | 25.0094  | 24.79315 | 24.8146  |

Table S19. The calculated shielding tensors of each conformer for isomer 2

(8*S*\*,9*S*\*,10*aR*\*-15)

| C  | 2-1      | 2-2      | 2-3      | 2-4      | 2-5      | 2-6      | 2-7      | 2-8      |
|----|----------|----------|----------|----------|----------|----------|----------|----------|
| 3  | 170.3594 | 170.1528 | 170.3686 | 170.0179 | 170.1921 | 170.4117 | 170.3583 | 170.0496 |
| 4  | 153.9054 | 151.6626 | 153.9136 | 152.6251 | 151.6858 | 153.6923 | 153.9084 | 152.6655 |
| 5  | 124.4264 | 121.6341 | 124.422  | 121.3244 | 121.673  | 122.4959 | 124.4229 | 121.3604 |
| 6  | 119.1458 | 120.9781 | 119.1494 | 119.4652 | 120.9482 | 118.617  | 119.1425 | 119.4652 |
| 7  | 65.465   | 66.7318  | 65.4768  | 66.9137  | 66.8225  | 66.7569  | 65.4697  | 66.9781  |
| 11 | 30.1662  | 30.1291  | 30.1429  | 30.1801  | 30.2777  | 30.3087  | 30.1585  | 30.3305  |
| 13 | 126.6705 | 125.5756 | 125.5761 | 125.6775 | 126.2629 | 126.5617 | 125.7933 | 125.7309 |
| 14 | 111.2262 | 111.4585 | 111.2025 | 110.8877 | 111.6157 | 111.3132 | 111.2141 | 111.0306 |

|    |            |            |            |            |            |            |            |            |
|----|------------|------------|------------|------------|------------|------------|------------|------------|
| 15 | 62.2087    | 62.3947    | 62.2066    | 62.4264    | 62.4601    | 60.2542    | 62.2091    | 62.4856    |
| 16 | 34.5814    | 34.5232    | 34.5616    | 34.5679    | 34.451     | 34.6121    | 34.5762    | 34.4982    |
| 17 | 95.51025   | 95.6375    | 95.51345   | 95.667     | 95.293     | 95.5322    | 95.509     | 95.3319    |
| 18 | 57.6742    | 57.6706    | 57.6754    | 57.5905    | 57.7908    | 57.9264    | 57.6682    | 57.7005    |
| 19 | 95.1145    | 95.0859    | 95.1196    | 94.9875    | 95.5186    | 94.8879    | 95.1121    | 95.4466    |
| 20 | 35.7811    | 35.737     | 35.7742    | 35.7373    | 35.6747    | 35.8174    | 35.7796    | 35.6773    |
| H  | <b>2-1</b> | <b>2-2</b> | <b>2-3</b> | <b>2-4</b> | <b>2-5</b> | <b>2-6</b> | <b>2-7</b> | <b>2-8</b> |
| 23 | 30.07275   | 30.1095    | 30.0727    | 30.06745   | 30.0943    | 30.0655    | 30.07275   | 30.0776    |
| 24 | 29.8154    | 29.8129    | 29.8145    | 29.8133    | 29.8263    | 29.8164    | 30.07275   | 29.8283    |
| 25 | 30.07275   | 30.1095    | 30.0727    | 30.06745   | 30.1453    | 30.1252    | 29.8148    | 30.0776    |
| 26 | 29.3114    | 29.4065    | 29.3114    | 29.2759    | 29.4165    | 29.32005   | 29.3113    | 29.2849    |
| 27 | 29.3114    | 29.3163    | 29.3114    | 29.3796    | 29.3246    | 29.32005   | 29.3113    | 29.3871    |
| 28 | 27.5828    | 27.5412    | 27.5821    | 27.8456    | 27.5519    | 27.7126    | 27.5829    | 27.8591    |
| 29 | 27.0484    | 26.9712    | 27.0472    | 27.1169    | 26.981     | 27.299     | 27.0486    | 27.1288    |
| 30 | 25.0487    | 24.9424    | 25.0485    | 24.935     | 24.9879    | 25.02065   | 25.0485    | 24.9822    |
| 33 | 24.6732    | 24.6308    | 24.6734    | 24.6397    | 24.8486    | 24.6966    | 24.6733    | 24.8537    |
| 34 | 25.0487    | 25.0287    | 25.0485    | 25.0278    | 24.8486    | 25.02065   | 25.0485    | 24.8537    |

Table S20. DP4<sup>+</sup> probability analysis of **29** (mPW1PW91/6-31+G(d, p) level)

| Functional |      | Solvent?     |             | Basis Set    |          | Type of Data      |          |
|------------|------|--------------|-------------|--------------|----------|-------------------|----------|
| mPW1PW91   |      | PCM          |             | 6-31+G(d, p) |          | Shielding Tensors |          |
|            |      | DP4+         | 0. 88%      | 99. 12%      | -        | -                 | -        |
| Nuclei     | sp2? | Experimental | Isomer 1    | Isomer 2     | Isomer 3 | Isomer 4          | Isomer 5 |
| C          |      | 12. 9        | 181. 152198 | 181. 278665  |          |                   |          |
| C          |      | 23. 3        | 171. 333453 | 171. 411157  |          |                   |          |
| C          | x    | 141. 4       | 47. 3621241 | 48. 0505148  |          |                   |          |
| C          |      | 77. 4        | 119. 166134 | 118. 074918  |          |                   |          |
| C          | x    | 128. 7       | 66. 0134575 | 65. 2677215  |          |                   |          |
| C          | x    | 135. 4       | 68. 9214161 | 65. 8620611  |          |                   |          |
| C          |      | 71. 6        | 123. 724365 | 122. 407288  |          |                   |          |
| C          |      | 66. 2        | 129. 414595 | 129. 62552   |          |                   |          |
| C          | x    | 126. 5       | 73. 0484486 | 72. 5192126  |          |                   |          |
| C          |      | 31. 5        | 156. 728692 | 156. 370926  |          |                   |          |
| C          | x    | 170. 5       | 28. 7441859 | 28. 672947   |          |                   |          |
| H          |      | 5. 03        | 26. 4634068 | 26. 5521303  |          |                   |          |
| H          |      | 1. 02        | 30. 5346643 | 30. 5415828  |          |                   |          |
| H          |      | 2. 16        | 28. 6276822 | 28. 6404505  |          |                   |          |
| H          | x    | 6. 54        | 24. 7309198 | 24. 72       |          |                   |          |
| H          | x    | 5. 73        | 25. 0434843 | 25. 24       |          |                   |          |
| H          | x    | 5. 83        | 25. 3587452 | 25. 13       |          |                   |          |
| H          |      | 3. 98        | 27. 182378  | 27. 24       |          |                   |          |
| H          |      | 3. 3         | 27. 8327058 | 27. 83       |          |                   |          |
| H          |      | 3. 09        | 28. 4258835 | 28. 54       |          |                   |          |
| H          |      | 2. 55        | 28. 8915918 | 28. 88       |          |                   |          |

| Functional       | Solvent? |          | Basis Set    |          | Type of Data      |          |
|------------------|----------|----------|--------------|----------|-------------------|----------|
| mPW1PW91         | PCM      |          | 6-31+G(d, p) |          | Shielding Tensors |          |
|                  | Isomer 1 | Isomer 2 | Isomer 3     | Isomer 4 | Isomer 5          | Isomer 6 |
| sDP4+ (H data)   | 66.90%   | 33.10%   | –            | –        | –                 | –        |
| sDP4+ (C data)   | 21.60%   | 78.40%   | –            | –        | –                 | –        |
| sDP4+ (all data) | 35.77%   | 64.23%   | –            | –        | –                 | –        |
| uDP4+ (H data)   | 33.62%   | 66.38%   | –            | –        | –                 | –        |
| uDP4+ (C data)   | 3.05%    | 96.95%   | –            | –        | –                 | –        |
| uDP4+ (all data) | 1.57%    | 98.43%   | –            | –        | –                 | –        |
| DP4+ (H data)    | 50.58%   | 49.42%   | –            | –        | –                 | –        |
| DP4+ (C data)    | 0.86%    | 99.14%   | –            | –        | –                 | –        |
| DP4+ (all data)  | 0.88%    | 99.12%   | –            | –        | –                 | –        |

Table S21. The experimental and calculated chemical shifts (DP4+) of **29**

| C  | Exp. <b>29</b> | Calcd. <b>29-1</b><br>(TMS) | Calcd. <b>29-2</b><br>(TMS) | Calcd. <b>29-1</b><br>(DMSO) | Calcd. <b>29-2</b><br>(DMSO) |
|----|----------------|-----------------------------|-----------------------------|------------------------------|------------------------------|
| 1  | 12.9           | 15.3                        | 15.2                        | 11.0                         | 10.9                         |
| 2  | 23.3           | 25.1                        | 25.0                        | 20.9                         | 20.8                         |
| 3  | 141.4          | 149.1                       | 148.4                       | 144.8                        | 144.1                        |
| 4  | 77.4           | 77.3                        | 78.4                        | 73.0                         | 74.1                         |
| 5  | 128.7          | 130.4                       | 131.2                       | 126.2                        | 126.9                        |
| 6  | 135.4          | 127.5                       | 130.6                       | 123.3                        | 126.3                        |
| 7  | 71.6           | 72.7                        | 74.0                        | 68.5                         | 69.8                         |
| 8  | 66.2           | 67.0                        | 66.8                        | 62.8                         | 62.6                         |
| 11 | 126.5          | 123.4                       | 123.9                       | 119.1                        | 119.7                        |
| 12 | 31.5           | 39.7                        | 40.1                        | 35.5                         | 35.8                         |
| 13 | 170.5          | 167.7                       | 167.8                       | 163.4                        | 163.5                        |
| H  | Exp. <b>29</b> | Calcd. <b>29-1</b><br>(TMS) | Calcd. <b>29-2</b><br>(TMS) | Calcd. <b>29-1</b><br>(DMSO) | Calcd. <b>29-2</b><br>(DMSO) |
| 16 | 5.03           | 5.09                        | 5.00                        | 5.21                         | 5.12                         |
| 17 | 1.02           | 1.02                        | 1.01                        | 1.14                         | 1.13                         |
| 18 | 2.16           | 2.92                        | 2.91                        | 3.04                         | 3.03                         |
| 19 | 6.54           | 6.82                        | 6.83                        | 6.94                         | 6.95                         |
| 20 | 5.73           | 6.51                        | 6.31                        | 6.63                         | 6.43                         |
| 21 | 5.83           | 6.19                        | 6.42                        | 6.31                         | 6.54                         |
| 22 | 3.98           | 4.37                        | 4.31                        | 4.49                         | 4.43                         |
| 23 | 3.3            | 3.72                        | 3.72                        | 3.84                         | 3.84                         |
| 24 | 3.09           | 3.12                        | 3.01                        | 3.24                         | 3.13                         |
| 25 | 2.55           | 2.66                        | 2.67                        | 2.78                         | 2.79                         |
| 26 | 5.03           | 5.09                        | 5.00                        | 5.21                         | 5.12                         |
| 27 | 1.02           | 1.02                        | 1.01                        | 1.14                         | 1.13                         |
| 30 | 2.16           | 2.92                        | 2.91                        | 3.04                         | 3.03                         |
| 31 | 6.54           | 6.82                        | 6.83                        | 6.94                         | 6.95                         |

Table S22. The calculated shielding tensors of each conformer for isomer 1

(5*R*\*,3'*R*\*-29)

| C  | 1-1      | 1-2      | 1-3      | 1-4      | 1-5      | 1-6      | 1-7      | 1-8      | 1-9      | 1-10     |
|----|----------|----------|----------|----------|----------|----------|----------|----------|----------|----------|
| 1  | 181.0276 | 181.2932 | 181.0596 | 181.4149 | 180.9688 | 181.5909 | 181.3231 | 181.0277 | 181.5178 | 181.0891 |
| 2  | 171.4732 | 171.2888 | 171.2832 | 171.2456 | 171.4301 | 171.6217 | 171.3215 | 171.382  | 171.4984 | 171.2253 |
| 3  | 48.5347  | 47.8019  | 47.5257  | 47.4208  | 46.4017  | 47.046   | 46.7916  | 47.36    | 46.5838  | 47.6685  |
| 4  | 116.4522 | 119.1457 | 119.016  | 119.6525 | 119.8337 | 119.6707 | 119.787  | 119.5621 | 119.7224 | 118.7777 |
| 5  | 69.8303  | 65.9151  | 65.8848  | 64.5943  | 63.9054  | 64.2199  | 64.2069  | 64.771   | 67.3371  | 69.6221  |
| 6  | 62.4416  | 68.9068  | 69.2045  | 66.8686  | 68.4591  | 68.4792  | 68.4217  | 66.6055  | 71.4449  | 71.9127  |
| 7  | 124.2979 | 123.9577 | 123.9101 | 120.2756 | 124.0614 | 120.5039 | 120.2438 | 120.2498 | 124.4691 | 124.3591 |
| 8  | 127.5954 | 129.9061 | 130.0747 | 129.8569 | 129.8784 | 130.0707 | 130.0793 | 130.0038 | 127.1213 | 127.0206 |
| 11 | 72.4294  | 72.3753  | 72.4553  | 72.0912  | 74.567   | 73.9702  | 73.7581  | 73.579   | 74.6119  | 72.6972  |
| 12 | 155.7729 | 155.7628 | 155.7871 | 158.9978 | 158.0566 | 162.7512 | 162.4982 | 158.7554 | 158.1073 | 155.5418 |
| 13 | 28.383   | 28.9453  | 28.9052  | 29.3114  | 28.2342  | 29.052   | 29.2893  | 29.0985  | 28.1143  | 28.8504  |
| H  | 1-1      | 1-2      | 1-3      | 1-4      | 1-5      | 1-6      | 1-7      | 1-8      | 1-9      | 1-10     |
| 16 | 26.6832  | 26.4951  | 26.4525  | 26.5241  | 26.3719  | 26.4305  | 26.4137  | 26.5     | 26.4025  | 26.5094  |
| 17 | 30.3476  | 30.7713  | 30.7762  | 30.7559  | 30.4968  | 30.4617  | 30.4708  | 30.7712  | 30.4952  | 30.3434  |
| 18 | 30.7915  | 30.3132  | 30.4683  | 30.28345 | 30.8463  | 30.8037  | 30.8307  | 30.4377  | 30.3334  | 30.7683  |
| 19 | 30.4611  | 30.4741  | 30.3464  | 30.4716  | 30.3722  | 30.35065 | 30.35885 | 30.3353  | 30.7716  | 30.4592  |
| 20 | 29.6376  | 27.6494  | 29.6201  | 27.6469  | 27.5755  | 29.6598  | 27.6252  | 29.6203  | 29.6787  | 29.6186  |
| 21 | 27.65735 | 29.6234  | 27.6187  | 29.6057  | 29.6654  | 27.684   | 29.6548  | 27.6505  | 27.5836  | 27.6173  |
| 22 | 24.7837  | 24.7039  | 24.7675  | 24.665   | 24.7047  | 24.634   | 24.7074  | 24.7051  | 24.7127  | 24.7886  |
| 23 | 25.1293  | 24.9709  | 24.9797  | 25.03555 | 25.1561  | 25.3404  | 25.3248  | 25.0172  | 25.1683  | 24.9791  |
| 24 | 25.4131  | 25.3337  | 25.3254  | 25.03555 | 25.56    | 24.9991  | 25.0129  | 25.0172  | 25.5728  | 25.289   |
| 25 | 27.028   | 27.1795  | 27.1941  | 27.2946  | 27.2587  | 27.3842  | 27.3573  | 27.3042  | 27.0824  | 27.0059  |
| 26 | 28.3263  | 27.7159  | 27.7072  | 28.0762  | 27.7278  | 28.0624  | 28.0416  | 28.0607  | 28.3368  | 28.3018  |
| 27 | 27.65735 | 27.8806  | 27.8777  | 27.4507  | 27.9195  | 27.483   | 27.4517  | 27.4461  | 27.643   | 27.6173  |
| 30 | 28.7005  | 28.4604  | 28.4621  | 28.5033  | 28.2633  | 28.3906  | 28.3784  | 28.5221  | 28.2778  | 28.4838  |
| 31 | 28.7716  | 28.9656  | 28.9489  | 28.6563  | 28.8764  | 28.4409  | 28.4559  | 28.6506  | 28.867   | 28.9298  |

Table S23. The calculated shielding tensors of each conformer for isomer 2

(5*R*\*,3'*S*\*-29).

| C | 2-1      | 2-2      | 2-3      | 2-4      | 2-5      | 2-6      | 2-7      | 2-8      | 2-9      | 2-10     |
|---|----------|----------|----------|----------|----------|----------|----------|----------|----------|----------|
| 1 | 181.3439 | 181.5935 | 180.5913 | 181.4445 | 181.3749 | 181.4621 | 181.5072 | 181.005  | 181.3498 | 181.1313 |
| 2 | 171.5188 | 171.4653 | 171.3786 | 171.3467 | 171.3995 | 171.5897 | 171.3813 | 171.4472 | 171.4898 | 171.3936 |
| 3 | 48.243   | 46.8962  | 46.8216  | 48.1325  | 48.3108  | 46.8528  | 47.7871  | 48.405   | 48.6467  | 48.1936  |
| 4 | 116.5088 | 119.5396 | 118.9214 | 117.112  | 119.1235 | 119.6469 | 118.9552 | 116.8806 | 118.898  | 118.9463 |
| 5 | 65.9702  | 63.923   | 63.8991  | 64.4781  | 65.5768  | 67.3905  | 69.4684  | 64.6206  | 69.0215  | 65.5473  |
| 6 | 61.0911  | 68.2132  | 66.7402  | 62.6983  | 68.5423  | 71.0448  | 71.74    | 62.7193  | 66.3861  | 68.5239  |
| 7 | 121.2154 | 124.0035 | 124.1083 | 120.6495 | 124.0156 | 124.4312 | 124.523  | 120.7035 | 124.2215 | 123.9918 |
| 8 | 128.7534 | 130.0374 | 130.0938 | 130.1021 | 129.7635 | 127.127  | 127.0911 | 129.9143 | 128.8604 | 129.7311 |



|    |            |            |            |            |            |            |            |            |            |             |
|----|------------|------------|------------|------------|------------|------------|------------|------------|------------|-------------|
| 11 | 72.7159    | 74.1601    | 74.0516    | 72.6545    | 71.936     | 74.2296    | 72.753     | 72.6371    | 71.6121    | 71.1354     |
| 12 | 155.9606   | 157.7631   | 156.0252   | 156.3829   | 155.7932   | 158.05     | 155.7765   | 156.5335   | 155.4009   | 155.7487    |
| 13 | 28.158     | 28.2794    | 28.0316    | 28.4803    | 29.2069    | 28.0698    | 29.068     | 28.356     | 29.0329    | 29.2541     |
| H  | <b>2-1</b> | <b>2-2</b> | <b>2-3</b> | <b>2-4</b> | <b>2-5</b> | <b>2-6</b> | <b>2-7</b> | <b>2-8</b> | <b>2-9</b> | <b>2-10</b> |
| 16 | 26.7156    | 26.3196    | 26.2834    | 26.7358    | 26.4207    | 26.3324    | 26.4299    | 26.7015    | 26.4641    | 26.3995     |
| 17 | 30.3263    | 30.346     | 30.9236    | 30.4931    | 30.3298    | 30.809     | 30.7878    | 30.3453    | 30.494     | 30.3418     |
| 18 | 30.4731    | 30.822     | 30.3617    | 30.7854    | 30.5001    | 30.5089    | 30.331     | 30.7979    | 30.7892    | 30.8131     |
| 19 | 30.7561    | 30.5056    | 30.5166    | 30.3152    | 30.8057    | 30.3528    | 30.479     | 30.4732    | 30.3375    | 30.4827     |
| 20 | 27.6243    | 29.6836    | 27.8072    | 27.647     | 27.68485   | 29.6918    | 27.6325    | 29.6339    | 27.62387   | 29.6192     |
| 21 | 29.6448    | 27.6473    | 29.6294    | 29.6272    | 29.6284    | 27.6176    | 29.6226    | 27.6303    | 29.6363    | 27.6403     |
| 22 | 24.7511    | 24.7141    | 24.7715    | 24.7434    | 24.6978    | 24.7207    | 24.7668    | 24.7151    | 24.7244    | 24.7037     |
| 23 | 25.4857    | 25.1835    | 25.2205    | 25.4312    | 24.97      | 25.1965    | 25.0324    | 25.435     | 25.0752    | 24.9722     |
| 24 | 25.4857    | 25.5247    | 25.554     | 24.8608    | 25.3344    | 25.5076    | 25.3071    | 24.8798    | 25.1298    | 25.362      |
| 25 | 27.208     | 27.1761    | 27.1241    | 27.3447    | 27.1505    | 27.0201    | 27.0033    | 27.3635    | 27.1776    | 27.1438     |
| 26 | 27.8361    | 27.8571    | 27.8807    | 28.0934    | 27.68485   | 28.4451    | 28.3237    | 28.0942    | 27.62387   | 27.731      |
| 27 | 28.1483    | 27.955     | 27.9755    | 27.4678    | 27.8996    | 27.7106    | 27.6325    | 27.5003    | 27.62387   | 27.9055     |
| 30 | 28.6651    | 28.2802    | 28.3588    | 28.6611    | 28.4525    | 28.2653    | 28.4919    | 28.6693    | 28.4711    | 28.4357     |
| 31 | 28.8133    | 28.9059    | 29.0185    | 28.7941    | 28.9382    | 28.899     | 28.9826    | 28.8396    | 28.9478    | 28.9663     |
